# Supplementary material for: A Gene-Based Linkage Map for Bicyclus anynana Butterflies Allows for a Comprehensive Analysis of Synteny with the Lepidopteran Reference Genome
Source: PLoS Genet. 2009 Feb 6;5(2):e1000366. doi: 10.1371/journal.pgen.1000366 (PMC2629579; doi:10.1371/journal.pgen.1000366)
Supplement: Table S2 — Genotypes of 288 panel individuals for each of the 533 converted SNPs. (1.04 MB XLS) [file pgen.1000366.s002.xls]

## Sheet: F1-F6
family	F1	F1	F1	F1	F1	F1	F1	F1	F1	F1	F1	F1	F1	F1	F1	F1	F1	F1	F1	F1	F1	F1	F1	F1	F2	F2	F2	F2	F2	F2	F2	F2	F2	F2	F2	F2	F2	F2	F2	F2	F2	F2	F2	F2	F2	F2	F2	F2	F3
role_in_family	1	2	3	3	3	3	3	3	3	3	3	3	3	3	3	3	3	3	3	3	3	3	3	3	1	2	3	3	3	3	3	3	3	3	3	3	3	3	3	3	3	3	3	3	3	3	3	3	1
ind_number	1	5	2	3	4	6	7	8	9	10	11	12	13	14	15	16	17	18	19	20	21	22	23	24	25	29	26	27	28	30	31	32	33	34	35	36	37	38	39	40	41	42	43	44	45	46	47	48	49
sex	0	1	0	0	0	1	1	1	0	0	0	0	1	1	1	1	0	0	0	0	1	1	1	1	0	1	0	0	0	1	1	1	0	0	0	0	1	1	1	1	0	0	0	0	1	1	1	1	0
C5501P516	2	1	2	2	2	1	1	2	2	2	2	1	6	2	1	2	2	2	1	1	1	2	1	2	3	3	3	3	3	3	3	3	3	3	3	3	3	3	3	3	3	3	3	3	3	3	3	3	3
G10P404	1	2	1	3	1	1	1	1	3	1	1	3	2	2	1	2	1	3	3	3	2	2	1	1	2	2	1	3	3	1	1	3	1	3	1	3	3	1	1	3	3	1	1	1	1	1	1	1	3
C5066P218	2	3	2	3	2	2	2	3	3	3	2	2	3	3	2	2	3	3	3	2	3	2	3	3	2	2	3	2	2	2	3	2	3	1	3	3	2	3	1	2	2	2	2	3	3	2	2	1	2
C681P201	3	3	3	3	3	3	3	3	3	3	3	3	3	3	3	3	3	3	3	3	3	3	3	3	3	3	3	3	3	3	3	3	3	3	3	3	3	3	3	3	3	3	3	3	3	3	3	3	3
C960P287	3	3	3	3	3	3	3	3	3	3	3	3	3	3	3	3	3	3	3	3	3	3	3	3	3	2	2	3	2	2	2	2	2	3	2	2	2	3	2	3	3	2	2	2	2	2	3	3	1
G6P127	2	2	3	2	3	2	2	2	2	2	1	3	2	2	3	2	3	2	2	2	1	2	3	2	2	1	2	2	2	1	1	2	2	1	1	2	2	2	1	1	1	2	1	1	1	1	1	2	2
C2480P978	1	1	1	1	1	1	1	1	1	1	1	1	1	1	1	1	1	1	1	1	1	1	1	1	1	1	1	1	1	1	1	1	1	1	1	1	1	1	1	1	1	1	1	1	1	1	1	1	1
C2598P375	3	3	3	3	3	3	3	3	3	3	3	3	3	3	3	3	3	3	3	3	3	3	3	3	2	1	1	2	1	1	1	1	1	1	1	1	2	2	2	2	2	2	2	2	2	1	1	2	3
C4266P307	3	3	3	3	3	3	3	3	3	3	3	3	3	3	3	3	3	3	3	3	3	3	3	3	3	3	3	3	3	3	3	3	3	3	3	3	3	3	3	3	3	3	3	3	3	3	3	3	3
C2669P435	2	1	1	1	1	2	1	2	1	6	2	1	6	1	2	1	2	2	2	2	1	1	1	2	3	3	3	3	3	3	3	3	3	3	3	3	3	3	3	3	3	3	3	3	3	3	3	3	3
C3282P289	3	3	3	3	3	3	3	3	3	3	3	3	3	3	3	3	3	3	3	3	3	3	3	3	2	2	1	2	1	2	1	1	2	2	1	1	3	1	3	1	3	2	2	1	2	2	1	3	3
C6246P682	2	2	2	3	2	3	3	1	2	3	1	2	3	2	3	2	2	1	3	2	2	1	2	2	3	3	3	3	3	3	3	3	3	3	3	3	3	3	3	3	3	3	3	3	3	3	3	3	3
C6976P456	3	3	3	3	3	3	3	3	3	3	3	3	3	3	3	3	3	3	3	3	3	3	3	3	2	2	3	3	2	2	2	2	2	2	2	3	1	2	1	2	2	1	3	2	3	1	2	2	3
C6322P350	1	3	2	2	2	2	2	2	2	4	2	2	2	2	2	2	2	2	2	2	2	2	2	2	1	1	1	1	1	1	1	1	1	1	1	1	1	1	1	1	1	1	1	1	1	1	1	1	1
C1393P256	3	3	3	3	3	3	3	3	3	3	3	3	3	3	3	3	3	3	3	3	3	3	3	3	1	2	2	1	2	1	2	2	1	1	1	2	2	1	1	2	2	2	1	1	1	2	2	2	3
C4436P218	2	3	3	2	2	2	2	2	3	3	3	2	3	3	3	3	3	3	2	2	2	2	2	3	2	3	3	3	2	2	2	2	2	3	2	2	2	2	2	3	3	2	2	3	3	2	2	2	3
C5875P602	2	2	3	2	2	3	2	2	3	3	2	1	2	1	2	2	3	2	3	2	2	3	2	3	2	2	2	2	3	1	1	2	3	2	2	3	2	2	2	2	2	2	3	2	3	1	2	3	2
G7P315	3	3	3	3	3	3	3	3	3	3	3	3	3	3	3	3	3	3	3	3	3	3	3	3	3	3	3	3	3	3	3	3	3	3	3	3	3	3	3	3	3	3	3	3	3	3	3	3	3
C5259P671	1	1	1	1	1	1	1	1	1	1	1	1	1	1	1	1	1	1	1	1	1	1	1	1	1	1	1	1	1	1	1	1	1	1	1	1	1	1	1	1	1	1	1	1	1	1	1	1	2
C3244P861	3	3	3	3	3	3	3	3	3	3	3	3	3	3	3	3	3	3	3	3	3	3	3	3	2	1	2	2	2	1	1	1	2	1	1	1	2	2	1	1	2	2	1	1	2	2	1	2	3
C5586P392	3	3	3	3	3	3	3	3	3	3	3	3	3	3	3	3	3	3	3	3	3	3	3	3	2	3	3	2	3	2	2	3	3	2	3	2	2	2	3	3	3	3	2	2	3	2	3	3	3
C2588P517	3	3	3	3	3	3	3	3	3	3	3	3	3	3	3	3	3	3	3	3	3	3	3	3	3	3	3	3	3	3	3	3	3	3	3	3	3	3	3	3	3	3	3	3	3	3	3	3	3
G21P231	3	2	3	3	3	3	3	3	2	4	3	2	2	2	3	3	2	2	2	2	2	2	3	2	2	2	3	2	2	2	3	2	3	1	3	3	2	3	1	2	2	2	2	3	3	2	2	1	2
C3958P146	3	3	3	3	3	3	3	3	3	3	3	3	3	3	3	3	3	3	3	3	3	3	3	3	2	2	2	2	1	2	1	1	3	2	1	3	2	2	2	1	2	2	3	1	1	1	2	2	3
C6778P338	2	1	2	2	1	1	1	1	2	1	2	2	1	1	2	1	1	1	1	1	1	2	2	2	3	3	3	3	3	3	3	3	3	3	3	3	3	3	3	3	3	3	3	3	3	3	3	3	3
C7605P296	3	3	3	3	3	0	0	3	3	3	3	3	3	3	3	3	3	3	3	0	0	3	3	3	1	2	2	1	2	2	2	1	1	1	1	2	2	2	1	1	2	2	2	1	1	2	2	2	2
C6245P97	1	1	1	1	1	1	1	1	1	1	1	1	1	1	1	1	1	1	1	1	1	1	1	1	2	1	1	1	1	1	1	2	2	2	1	2	2	2	2	2	2	2	2	1	1	1	2	2	1
C2337P828	3	2	2	3	2	2	3	2	2	3	2	2	3	2	3	3	3	2	3	2	3	3	2	3	3	3	3	3	3	3	3	3	3	3	3	3	3	3	3	3	3	3	3	3	3	3	3	3	3
C7736P814	3	3	3	3	3	3	3	3	3	3	3	3	3	3	3	3	3	3	3	3	3	3	3	3	3	3	3	3	3	3	3	3	3	3	3	3	3	3	3	3	3	3	3	3	3	3	3	3	2
C4108P507	1	1	1	1	1	1	1	1	1	1	1	1	1	1	1	1	1	1	1	1	1	1	1	1	1	1	1	1	1	1	1	1	1	1	1	1	1	1	1	1	1	1	1	1	1	1	1	1	2
C1576P882	1	1	1	1	1	1	1	1	1	1	1	1	1	1	1	1	1	1	1	1	1	1	1	1	2	2	2	2	3	2	3	2	1	2	3	1	2	2	2	3	2	2	1	3	3	3	2	2	2
C7148P593	1	1	1	1	1	1	1	1	1	1	1	1	1	1	1	1	1	1	1	1	1	1	1	1	1	1	1	1	1	1	1	1	1	1	1	1	1	1	1	1	1	1	1	1	1	1	1	1	2
C6961P563	3	3	3	3	3	3	3	3	3	3	3	3	3	3	3	3	3	3	3	3	3	3	3	3	3	3	3	3	3	3	3	3	3	3	3	3	3	3	3	3	3	3	3	3	3	3	3	3	2
C3505P1918	2	3	3	2	3	2	2	3	2	3	3	3	3	3	2	2	2	3	2	2	2	2	3	2	2	2	2	3	1	2	2	3	2	3	2	2	2	2	3	2	2	2	2	2	2	1	2	2	2
G20P773	2	1	2	2	2	2	2	1	1	2	1	1	2	2	2	2	2	1	2	1	1	1	2	2	2	1	2	2	1	1	1	1	2	2	2	2	2	2	2	1	2	2	2	1	1	1	2	1	3
C2311P171	3	3	3	3	3	3	3	3	3	3	3	3	3	3	3	3	3	3	3	3	3	3	3	3	3	3	3	3	3	3	3	3	3	3	3	3	3	3	3	3	3	3	3	3	3	3	3	3	2
C4154P1060	6	2	1	3	1	2	3	1	1	0	1	2	0	1	3	1	3	3	3	2	3	3	2	3	1	1	1	1	1	1	1	1	1	1	1	1	1	1	1	1	1	1	1	1	1	1	1	1	2
C5034P456	3	3	3	3	3	3	3	3	3	3	3	3	3	3	3	3	3	3	3	3	3	3	3	3	3	3	3	3	3	3	3	3	3	3	3	3	3	3	3	3	3	3	3	3	3	3	3	3	3
C7433P337	3	3	3	3	3	3	3	3	3	3	3	3	3	3	3	3	3	3	3	3	3	3	3	3	3	3	3	3	3	3	3	3	3	3	3	3	3	3	3	3	3	3	3	3	3	3	3	3	3
C259P90	2	1	2	1	2	2	2	1	1	1	2	2	1	1	2	2	1	1	1	2	1	2	1	1	2	2	1	2	2	2	1	2	1	3	1	1	2	1	3	2	2	2	2	1	1	2	2	3	2
C6378P534	3	3	3	3	3	3	3	3	3	3	3	3	3	3	3	3	3	3	3	3	3	3	3	3	1	2	2	1	2	2	2	1	2	1	1	2	2	2	2	1	1	2	2	2	2	1	1	1	2
C6470P474	1	1	1	1	1	1	1	1	1	1	1	1	1	1	1	1	1	1	1	1	1	1	1	1	1	1	1	1	1	1	1	1	1	1	1	1	1	1	1	1	1	1	1	1	1	1	1	1	1
C5011P541	1	2	2	2	2	2	2	1	2	1	2	1	1	1	1	2	1	1	2	1	2	1	1	1	1	1	1	1	1	1	1	1	1	1	1	1	1	1	1	1	1	1	1	1	1	1	1	1	2
C5067P558	3	2	2	2	3	3	2	3	3	3	2	2	2	3	3	3	3	2	3	3	3	2	3	2	2	3	2	2	2	3	2	2	2	2	2	2	3	2	3	2	3	2	3	2	3	2	2	3	3
C7963P240	3	3	3	3	3	3	3	3	3	3	3	3	3	3	3	3	3	3	3	3	3	3	3	3	2	2	3	1	3	2	2	1	1	3	2	2	2	1	2	3	3	2	1	1	3	1	2	2	3
G20P118	2	1	2	2	2	2	2	1	1	2	1	1	2	2	2	2	2	1	2	1	1	1	2	2	2	1	2	2	1	1	1	1	2	2	2	2	2	2	2	1	2	2	2	1	1	1	2	1	3
C5010P530	3	3	3	3	3	3	3	3	3	3	3	3	3	3	3	3	3	3	3	3	3	3	3	3	3	3	3	3	3	3	3	3	3	3	3	3	3	3	3	3	3	3	3	3	3	3	3	3	3
C2403P977	2	2	2	3	2	1	1	2	2	1	1	2	3	1	2	1	3	3	3	2	3	3	3	3	3	3	3	3	3	3	3	3	3	3	3	3	3	3	3	3	3	3	3	3	3	3	3	3	2
C4269P217	2	2	2	2	1	2	2	2	1	2	2	1	2	1	2	2	2	3	3	2	1	2	1	3	1	1	1	1	1	1	1	1	1	1	1	1	1	1	1	1	1	1	1	1	1	1	1	1	1
G25P134	3	3	3	3	3	3	3	3	3	3	3	3	3	3	3	3	3	3	3	3	3	3	3	3	3	3	3	3	3	3	3	3	3	3	3	3	3	3	3	3	3	3	3	3	3	3	3	3	3
C4014P649	2	2	2	3	3	1	1	3	2	2	1	2	1	2	2	2	1	3	2	1	2	2	2	1	2	2	2	2	1	1	1	3	2	2	2	2	3	3	2	3	2	2	3	1	2	2	3	3	1
C493P465	2	2	3	2	2	1	1	2	2	1	3	1	1	1	1	2	2	2	1	2	2	2	3	1	3	1	3	3	2	2	3	1	2	3	3	2	3	1	1	1	3	3	3	1	1	3	2	3	3
G3P433	2	2	3	3	2	3	2	2	2	1	2	2	3	2	2	3	2	1	2	2	2	1	2	2	3	3	3	3	3	3	3	3	3	3	3	3	3	3	3	3	3	3	3	3	3	3	3	3	2
C5215P416	1	1	1	1	1	1	1	1	1	1	1	1	1	1	1	1	1	1	1	1	1	1	1	1	1	1	1	1	1	1	1	1	1	1	1	1	1	1	1	1	1	1	1	1	1	1	1	1	2
C1071P1009	3	3	3	3	3	3	3	3	3	3	3	3	3	3	3	3	3	3	3	3	3	3	3	3	3	3	3	3	3	3	3	3	3	3	3	3	3	3	3	3	3	3	3	3	3	3	3	3	3
C6383P317	3	3	3	3	3	3	3	3	3	4	3	3	5	3	3	3	3	3	3	3	3	3	3	4	1	1	1	1	1	1	1	1	1	1	1	1	1	1	1	1	1	1	1	1	1	1	1	1	1
C697P580	3	3	3	3	3	3	3	3	3	3	3	3	3	3	3	3	3	3	3	3	3	3	3	3	3	3	3	3	3	3	3	3	3	3	3	3	3	3	3	3	3	3	3	3	3	3	3	3	2
C2483P1107	2	2	1	3	1	2	2	1	3	3	2	3	3	2	2	2	3	3	3	1	2	2	2	3	2	2	3	3	2	3	2	2	2	1	3	2	3	1	2	2	3	2	3	2	1	3	2	2	1
C3560P974	1	2	1	1	2	1	1	1	2	3	1	2	2	2	1	1	2	2	2	2	2	2	2	2	3	3	3	3	3	3	3	3	3	3	3	3	3	3	3	3	3	3	3	3	3	3	3	3	3
G19P749	2	3	2	2	2	2	2	3	3	2	3	3	2	2	2	2	2	3	2	3	3	3	2	2	2	3	2	2	3	3	3	3	2	2	2	2	2	2	2	3	2	2	2	3	3	3	2	3	2
C8108P318	2	3	2	2	3	3	3	2	2	2	3	3	2	2	2	3	3	2	3	3	3	3	2	2	3	2	2	2	2	2	2	3	3	3	2	3	3	3	2	2	2	2	3	2	2	2	3	2	3
C6044P553	3	2	3	2	3	2	2	3	2	2	3	2	2	3	2	2	3	3	3	2	2	3	3	3	3	3	3	3	3	3	3	3	3	3	3	3	3	3	3	3	3	3	3	3	3	3	3	3	2
C5106P480	1	1	1	1	1	1	1	1	1	1	1	1	1	1	1	1	1	1	1	1	1	1	1	1	2	2	2	3	2	2	1	2	1	2	2	1	1	3	3	1	3	2	1	2	2	2	1	1	2
C4302P1067	2	2	2	2	3	2	2	2	3	2	2	3	2	3	2	2	2	1	1	2	3	2	3	1	3	3	3	3	3	3	3	3	3	3	3	3	3	3	3	3	3	3	3	3	3	3	3	3	2
C995P671	1	1	1	1	1	1	1	1	1	1	1	1	1	1	1	1	1	1	1	1	1	1	1	1	2	3	2	2	2	3	3	3	2	3	3	3	2	2	3	3	2	2	3	3	2	2	3	2	1
C3359P304	2	2	3	2	2	2	2	2	2	3	2	1	1	1	2	3	3	2	3	2	2	2	2	3	3	3	3	3	3	3	3	3	3	3	3	3	3	3	3	3	3	3	3	3	3	3	3	3	3
C1214P461	1	1	1	1	1	1	1	1	1	1	1	1	1	1	1	1	1	1	1	1	1	1	1	1	1	1	1	1	1	1	1	1	1	1	1	1	1	1	1	1	1	1	1	1	1	1	1	1	1
C6466P276	2	2	2	2	1	1	2	2	2	2	3	2	3	1	2	2	3	3	1	3	1	3	3	2	2	3	3	3	2	2	2	3	3	3	3	3	3	3	2	2	3	3	2	2	3	3	2	2	3
C4927P108	3	3	3	3	3	3	3	3	3	3	3	3	3	3	3	3	3	3	3	3	3	3	3	3	2	2	3	2	2	2	3	2	3	1	3	3	2	3	1	2	2	2	2	3	3	2	2	1	2
C1975P770	2	2	3	2	2	1	1	2	2	1	3	1	2	1	1	2	2	2	1	2	2	2	3	1	3	3	3	3	3	3	3	3	3	3	3	3	3	3	3	3	3	3	3	3	3	3	3	3	3
C4315P371	1	1	1	1	1	0	0	1	1	0	0	1	1	1	1	1	1	0	1	1	1	0	1	1	3	3	3	3	3	3	3	3	3	3	3	3	3	3	3	3	3	3	3	3	3	3	3	3	3
C4460P231	2	1	1	1	2	2	1	2	2	2	1	1	1	2	2	1	1	1	2	1	2	1	1	6	1	1	1	1	1	1	1	1	1	1	1	1	1	1	1	1	1	1	1	1	1	1	1	1	1
C2605P380	3	3	3	3	3	3	3	3	3	3	3	3	3	3	3	3	3	3	3	3	3	3	3	3	2	2	3	2	3	3	1	2	3	1	1	3	2	2	2	2	2	2	2	2	2	2	3	3	3
C2691P265	2	3	3	3	2	2	3	2	2	3	3	3	3	3	2	2	3	2	3	3	3	3	3	3	2	2	2	1	2	2	3	2	3	2	2	2	3	2	1	3	1	2	3	2	2	2	2	3	1
C4824P1045	3	2	2	2	2	2	3	2	2	3	2	2	3	2	3	3	3	2	3	2	3	3	3	3	2	1	1	2	1	2	2	1	1	2	1	2	2	2	1	1	1	1	2	2	1	2	1	1	2
G22P88	3	1	1	1	1	2	2	2	1	1	1	1	2	2	2	2	1	1	1	1	2	2	2	2	1	1	1	0	0	1	1	1	1	0	1	0	1	1	1	1	0	1	1	1	1	1	1	1	0
C1425P629	2	2	3	1	3	2	2	1	2	2	1	2	3	2	2	3	2	2	2	3	2	1	2	2	1	2	2	2	1	1	2	1	2	1	1	2	2	1	2	1	2	2	1	1	2	1	2	2	1
C8135P293	3	3	3	3	3	3	3	3	3	3	3	3	3	3	3	3	3	3	3	3	3	3	3	3	3	2	3	3	2	2	2	3	3	2	3	3	3	2	2	3	3	3	3	2	3	2	2	2	3
C3046P1618	2	3	3	3	2	2	2	2	2	2	2	2	3	2	3	2	3	3	3	3	3	3	3	3	2	2	3	2	2	2	3	3	3	2	2	2	3	1	2	2	2	3	2	2	3	3	2	1	3
C5516P391	3	3	3	3	3	3	3	3	3	3	3	3	3	3	3	3	3	3	3	3	3	3	3	3	1	2	1	2	2	1	2	2	2	1	2	2	1	2	2	2	1	1	1	2	2	1	1	1	1
C7031P1283	2	2	3	2	2	1	1	2	2	1	3	1	2	1	1	2	2	2	1	2	2	2	3	1	3	3	3	3	3	3	3	3	3	3	3	3	3	3	3	3	3	3	3	3	3	3	3	3	2
C2832P641	2	2	2	3	2	1	1	3	3	1	1	3	3	2	2	2	2	1	2	3	2	1	3	2	3	3	3	3	3	3	3	3	3	3	3	3	3	3	3	3	3	3	3	3	3	3	3	3	3
C1920P110	3	2	3	2	3	2	2	3	2	2	3	2	2	3	2	2	3	3	3	2	2	3	3	3	3	3	3	3	3	3	3	3	3	3	3	3	3	3	3	3	3	3	3	3	3	3	3	3	2
C8118P736	2	1	1	1	2	2	2	2	2	2	1	2	2	2	2	2	2	2	2	2	1	1	2	6	2	2	2	3	2	1	3	2	2	1	1	1	2	2	2	2	3	2	2	3	2	3	2	2	2
C6152P344	3	3	3	3	3	3	3	3	3	3	3	3	3	3	3	3	3	3	3	3	3	3	3	3	2	2	2	2	1	2	1	2	3	2	1	3	2	2	2	1	2	2	3	1	1	1	2	2	3
C3895P862	3	3	3	3	3	3	3	3	3	3	3	3	3	3	3	3	3	3	3	3	3	3	3	3	2	2	2	1	2	2	1	3	2	2	2	2	3	3	2	3	3	2	2	1	2	2	3	2	2
C2850P210	3	3	3	3	3	3	3	3	3	3	3	3	3	3	3	3	3	3	3	3	3	3	3	3	3	3	3	3	3	3	3	3	3	3	3	3	3	3	3	3	3	3	3	3	3	3	3	3	3
C1528P893	1	2	2	1	2	1	1	2	1	6	1	1	1	1	1	2	1	1	1	2	2	1	2	1	2	1	2	2	2	2	2	1	1	1	2	2	2	1	1	1	2	1	2	1	1	2	1	1	3
C7446P232	2	2	1	2	1	0	2	2	2	2	3	2	1	2	1	1	2	1	2	2	3	2	2	2	2	2	3	3	2	2	1	2	3	2	1	3	2	3	2	2	1	3	2	1	1	1	2	2	2
C6023P1088	1	1	1	1	1	1	1	1	1	1	1	1	1	1	1	1	1	1	1	1	1	1	1	1	1	1	1	1	1	1	1	1	1	1	1	1	1	1	1	1	1	1	1	1	1	1	1	1	1
C3734P358	2	2	3	1	2	1	3	1	1	2	1	1	2	2	2	2	2	2	2	3	3	1	2	2	2	2	2	1	1	2	2	2	2	2	3	2	3	2	1	2	2	2	3	1	1	3	3	3	2
C7263P405	3	3	3	3	3	3	4	3	3	3	3	3	3	3	3	3	3	3	3	3	4	3	3	3	3	3	3	0	3	3	0	0	3	3	3	0	3	3	0	3	3	3	3	3	3	3	3	0	1
C2056P834	3	3	3	3	3	3	3	3	3	3	3	3	3	3	3	3	3	3	3	3	3	3	3	3	2	3	3	2	2	2	3	3	3	3	2	3	3	2	2	3	2	2	3	3	2	2	3	3	3
G16P168	3	3	3	3	3	3	3	3	3	5	3	3	5	3	3	3	3	3	3	3	3	3	3	5	2	2	2	2	2	2	3	3	1	2	2	3	1	2	3	1	2	2	2	1	2	2	1	3	3
C6583P465	3	2	2	3	3	3	3	2	2	3	2	3	2	3	3	2	3	3	3	2	2	2	2	3	2	2	2	3	3	2	1	2	3	1	1	3	2	2	2	2	2	2	2	2	2	2	3	2	2
C2817P666	3	2	1	3	1	2	2	2	3	3	3	1	2	2	2	2	1	1	3	3	3	3	2	3	1	1	1	1	1	1	1	1	1	1	1	1	1	1	1	1	1	1	1	1	1	1	1	1	1
G24P74	3	3	3	3	3	3	3	3	3	3	3	3	3	3	3	3	3	3	3	3	3	3	3	3	3	3	3	3	3	3	3	3	3	3	3	3	3	3	3	3	3	3	3	3	3	3	3	3	2
C4576P3784	3	2	2	2	2	2	2	2	3	3	3	3	3	3	2	2	2	3	2	3	3	2	2	3	3	3	3	3	3	3	3	3	3	3	3	3	3	3	3	3	3	3	3	3	3	3	3	3	1
C684P573	1	2	1	1	1	2	1	1	1	2	1	1	2	2	2	2	1	2	2	2	2	2	2	2	2	2	1	3	2	2	1	2	1	2	2	2	1	2	3	1	2	2	1	2	2	2	2	1	2
C1137P1529	1	1	1	1	1	1	1	1	1	1	1	1	1	1	1	1	1	1	1	1	1	1	1	1	1	1	1	1	1	1	1	1	1	1	1	1	1	1	1	1	1	1	1	1	1	1	1	1	1
C790P473	1	1	1	1	1	1	1	1	1	1	1	1	1	1	1	1	1	1	1	1	1	1	1	1	1	2	1	2	1	2	1	1	1	2	1	1	2	1	2	2	1	2	2	1	1	2	2	2	3
C1486P605	1	1	1	1	1	1	1	1	1	1	1	1	1	1	1	1	1	1	1	1	1	1	1	1	2	2	2	2	3	2	3	3	3	3	3	3	1	1	1	1	2	2	1	1	1	3	2	2	1
C1073P159	3	3	3	3	3	3	3	3	3	3	3	3	3	3	3	3	3	3	3	3	3	3	3	3	1	2	2	1	2	1	2	2	2	2	1	2	1	1	1	1	2	1	2	2	1	2	1	1	2
C7709P188	1	1	1	1	1	1	1	1	1	1	1	1	1	1	1	1	1	1	1	1	1	1	1	1	1	1	1	1	1	1	1	1	1	1	1	1	1	1	1	1	1	1	1	1	1	1	1	1	2
C142P252	2	2	2	1	2	2	2	1	2	3	2	3	2	2	2	2	2	2	2	3	2	3	2	2	2	2	3	2	2	2	3	2	3	1	3	3	2	3	1	2	2	1	2	3	3	2	2	1	3
C5680P109	2	2	2	1	2	3	3	1	1	3	3	1	2	2	2	2	2	3	2	1	2	3	1	2	2	3	3	2	3	3	3	3	3	3	3	3	2	2	2	2	2	2	2	2	2	3	3	2	3
C1043P559	4	4	1	1	1	1	1	1	1	2	1	1	2	1	1	1	1	1	1	1	1	1	1	2	2	2	3	2	1	2	2	2	2	2	3	2	3	1	2	2	2	3	3	1	2	3	3	3	1
C3909P380	1	2	1	2	1	2	2	2	2	1	2	2	1	1	2	2	1	1	1	1	1	1	1	2	2	2	1	2	3	2	1	2	1	3	1	1	2	2	3	1	2	3	2	1	2	2	1	3	1
C2769P512	3	2	2	2	2	2	2	3	3	2	3	2	2	2	3	2	3	3	2	3	2	3	2	3	2	3	3	3	2	2	2	3	3	3	3	3	3	3	2	2	3	3	2	2	3	3	2	2	1
C1915P1162	2	1	1	1	2	2	2	2	2	2	2	2	1	2	1	2	1	1	1	1	1	1	1	1	2	2	1	2	2	2	1	1	1	2	2	2	1	2	2	2	2	1	2	2	1	1	2	3	2
C6755P790	1	2	2	1	1	2	2	2	2	1	1	1	1	2	2	1	2	2	2	2	1	1	1	2	1	1	1	1	1	1	1	1	1	1	1	1	1	1	1	1	1	1	1	1	1	1	1	1	2
G21P360	2	1	2	1	2	2	2	1	1	1	2	2	1	1	2	2	1	1	1	2	1	2	1	1	2	2	3	2	2	2	3	2	3	1	3	3	2	3	1	2	2	2	2	3	3	2	2	1	1
C2102P607	3	2	2	2	2	2	2	3	3	2	3	2	2	2	3	2	3	3	2	3	2	3	2	3	2	2	3	3	1	2	1	2	3	3	3	2	2	2	1	1	2	3	1	1	2	2	2	1	1
C3482P668	2	2	2	2	1	3	3	2	2	1	2	2	1	2	2	2	2	2	2	3	3	2	1	2	1	3	3	0	2	3	3	0	1	0	1	3	2	3	0	1	3	3	3	1	1	2	2	0	1
C2583P371	2	3	2	2	2	3	3	2	2	2	2	3	4	2	3	2	2	2	3	3	3	2	3	2	3	2	2	3	2	3	2	2	2	2	3	2	3	3	2	3	2	3	2	2	3	2	3	3	2
C5636P122	2	2	2	3	2	2	2	2	2	3	2	2	2	2	3	2	2	2	2	2	1	2	2	2	2	3	2	2	2	3	3	3	2	3	3	3	2	2	3	3	2	2	3	3	2	2	3	2	3
C4110P249	3	3	3	3	3	3	3	3	3	3	3	3	5	3	3	3	3	3	3	3	3	3	3	5	3	2	3	3	2	3	2	2	3	3	2	3	2	3	2	3	3	2	3	2	2	2	3	2	2
C1180P427	3	3	3	3	3	3	3	3	3	3	3	3	3	3	3	3	3	3	3	3	3	3	3	3	2	2	2	2	1	2	3	2	1	1	1	1	2	3	2	3	2	3	1	2	2	3	2	1	3
C98P235	2	2	1	2	2	2	2	2	2	3	2	3	3	3	2	1	1	2	1	2	2	2	2	3	2	2	2	2	3	2	1	2	3	2	2	3	2	1	2	1	2	1	3	2	3	1	2	3	1
C8125P384	3	2	2	3	2	3	2	2	2	2	2	2	3	3	2	3	2	2	2	3	2	2	3	3	3	3	3	3	3	3	3	3	3	3	3	3	3	3	3	3	3	3	3	3	3	3	3	3	3
G17P137	1	3	3	3	3	2	2	2	3	4	3	3	2	2	2	2	3	3	3	3	2	2	2	2	1	2	3	3	3	1	1	2	3	3	3	3	2	1	1	2	3	3	1	1	1	1	1	1	3
C5812P593	2	2	1	2	2	3	2	1	2	1	2	2	2	1	2	3	2	2	2	2	2	3	2	3	3	3	3	3	3	3	3	3	3	3	3	3	3	3	3	3	3	3	3	3	3	3	3	3	1
C3763P929	1	1	1	1	1	1	1	1	1	1	1	1	1	1	1	1	1	1	1	1	1	1	1	1	1	2	1	2	2	2	1	1	1	2	1	1	2	2	2	2	1	2	2	1	2	2	1	2	2
C7430P1262	2	2	2	3	2	1	1	2	3	3	1	2	1	2	2	2	1	3	1	1	2	2	2	1	2	3	3	3	3	3	3	2	2	2	3	2	2	2	2	2	2	2	2	3	3	3	2	2	1
C1513P563	2	2	2	1	2	3	2	2	2	1	1	1	1	2	3	3	1	3	1	2	1	2	2	2	1	1	1	1	1	1	1	1	1	1	1	1	1	1	1	1	1	1	1	1	1	1	1	1	1
C435P628	3	3	3	3	3	3	3	3	3	3	3	3	3	3	3	3	3	3	3	3	3	3	3	3	3	3	3	3	3	3	3	3	3	3	3	3	3	3	3	3	3	3	3	3	3	3	3	3	3
C8120P393	3	3	3	3	3	3	3	3	3	3	3	3	3	3	3	3	3	3	3	3	0	3	3	3	3	3	3	3	3	3	3	3	3	3	3	3	3	3	3	3	3	3	3	3	3	3	3	3	3
C6024P311	2	2	3	2	2	1	2	1	1	1	3	3	3	2	1	2	2	2	2	2	2	3	2	2	2	3	2	2	2	3	2	2	2	2	2	2	3	2	3	2	3	2	3	2	3	2	2	3	3
G16P850	1	1	1	1	1	1	1	1	1	1	1	1	1	1	1	1	1	1	1	1	1	1	1	1	1	1	1	1	1	1	1	1	1	1	1	1	1	1	1	1	1	1	1	1	1	1	1	1	2
C7937P506	2	2	2	3	3	3	2	1	2	3	2	2	3	2	3	3	2	1	2	1	2	2	3	1	1	2	1	1	2	2	1	2	2	1	1	1	1	2	1	2	2	1	2	1	2	2	1	2	1
C5578P867	3	3	3	3	3	3	3	3	3	3	3	3	3	3	3	3	3	3	3	3	3	3	3	3	2	3	3	3	3	3	3	2	2	2	3	3	3	2	2	2	3	2	3	2	2	3	2	2	3
C3876P1845	1	1	1	1	1	1	1	1	1	1	1	1	1	1	1	1	1	1	1	1	1	1	1	1	1	1	1	1	1	1	1	1	1	1	1	1	1	1	1	1	1	1	1	1	1	1	1	1	1
C27P1776	1	1	1	1	1	1	1	1	1	1	1	1	1	1	1	1	1	1	1	1	1	1	1	1	2	1	2	2	2	1	1	2	2	1	1	2	2	2	1	1	1	2	1	1	1	1	1	2	3
C7771P894	3	2	3	3	3	3	3	3	2	1	3	2	2	2	3	3	2	2	2	2	2	2	2	2	2	2	3	2	2	2	3	2	3	1	3	3	2	3	1	2	2	2	2	3	3	2	2	1	1
C857P821	2	2	3	2	2	3	2	2	2	2	2	2	3	2	2	3	2	2	2	2	2	1	3	2	3	3	3	3	3	3	3	3	3	3	3	3	3	3	3	3	3	3	3	3	3	3	3	3	2
C2488P696	3	3	3	3	3	3	3	3	3	3	3	3	3	3	3	3	3	3	3	3	3	3	3	3	3	3	3	3	3	3	3	3	3	3	3	3	3	3	3	3	3	3	3	3	3	3	3	3	2
C2586P204	2	2	2	3	2	3	3	1	2	3	1	2	3	2	3	3	2	1	2	2	2	1	2	1	2	2	2	2	2	2	2	2	3	2	2	3	2	3	2	2	3	2	3	1	1	1	2	2	3
C440P376	2	1	2	2	2	1	1	2	2	2	2	1	6	2	1	2	2	2	1	1	1	2	1	2	2	1	1	2	1	2	2	1	1	2	1	2	2	2	1	1	1	1	2	2	1	2	1	1	3
C1955P491	2	2	1	2	2	1	2	2	3	2	2	2	1	2	2	2	2	2	2	2	3	2	1	1	3	3	3	3	3	3	3	3	3	3	3	3	3	3	3	3	3	3	3	3	3	3	3	3	1
C6492P151	2	2	2	1	2	3	3	3	2	2	1	2	2	2	3	3	3	2	3	2	1	2	3	3	2	2	2	3	2	1	3	2	2	1	1	1	2	2	2	2	3	2	2	2	2	3	2	2	2
C7561P266	3	3	3	3	3	3	3	3	3	3	3	3	3	3	3	3	3	3	3	3	3	3	3	3	2	2	2	2	2	3	3	2	2	2	2	1	2	2	2	2	3	2	2	2	1	3	2	2	3
C7431P153	2	2	2	3	2	1	1	2	2	1	1	2	3	1	2	1	3	3	3	2	3	3	3	3	1	1	1	1	1	1	1	1	1	1	1	1	1	1	1	1	1	1	1	1	1	1	1	1	1
C6652P175	1	1	1	1	1	0	1	1	1	0	1	1	0	0	0	1	1	1	0	1	1	1	1	0	2	6	1	2	2	1	3	3	1	3	3	1	2	3	3	3	2	2	2	3	3	2	1	1	3
C2621P565	3	3	3	0	3	3	3	3	3	3	3	3	0	3	3	3	0	0	0	3	0	0	0	0	2	2	3	2	2	2	3	2	3	2	1	1	3	2	2	2	2	3	2	2	3	2	3	1	3
C1526P774	2	3	2	2	3	3	3	2	2	2	3	3	2	2	2	3	3	2	3	3	3	3	2	2	2	2	2	1	1	2	1	2	3	2	1	3	2	2	2	1	1	2	3	1	1	1	2	2	3
C3532P392	2	2	2	1	2	3	3	1	1	3	3	1	1	2	2	2	2	3	2	1	2	3	1	2	3	2	2	3	3	2	3	3	3	3	3	2	2	2	2	2	3	3	2	2	2	2	2	3	2
C758P972	2	2	1	2	2	1	2	2	2	3	2	2	1	2	2	1	2	3	2	2	2	3	1	2	3	3	3	3	3	3	3	3	3	3	3	3	3	3	3	3	3	3	3	3	3	3	3	3	2
C2278P790	1	1	1	1	1	1	1	1	1	1	1	1	1	1	1	1	1	1	1	1	1	1	1	1	1	2	2	1	1	2	1	1	2	2	2	2	1	1	2	2	1	2	1	1	2	1	2	1	1
C5193P405	2	2	2	3	2	1	1	3	3	1	1	3	2	2	2	2	2	2	2	3	2	1	3	2	2	1	1	2	1	1	1	1	1	1	1	1	2	2	2	2	2	2	2	2	2	1	1	2	3
C7217P720	3	3	3	3	3	3	3	3	3	3	3	3	3	3	3	3	3	3	3	3	3	3	3	3	2	2	2	2	1	2	1	1	1	1	2	2	3	3	3	3	2	2	3	3	3	2	1	2	3
C5413P468	3	3	3	3	3	3	3	3	3	3	3	3	5	3	3	3	3	3	3	3	3	3	3	1	3	2	3	3	2	3	2	2	3	3	2	3	2	3	2	3	3	2	3	2	2	2	3	2	1
C1061P507	1	1	1	1	1	1	1	1	1	1	1	1	1	1	1	1	1	1	1	1	1	1	1	1	1	1	1	1	1	1	1	1	1	1	1	1	1	1	1	1	1	1	1	1	1	1	1	1	1
C5369P603	3	3	3	3	3	3	3	3	3	3	3	3	3	3	3	3	3	3	3	3	3	3	3	3	3	3	3	3	3	3	3	3	3	3	3	3	3	3	3	3	3	3	3	3	3	3	3	3	3
C1751P356	1	1	1	1	1	1	1	1	1	1	1	1	1	1	1	1	1	1	1	1	1	1	1	1	1	1	1	1	1	1	1	1	1	0	0	0	1	1	1	1	1	1	1	1	1	1	1	1	1
C1622P256	2	2	2	2	1	2	2	2	1	2	2	1	2	1	2	2	2	3	3	2	2	2	1	3	1	1	1	1	1	1	1	1	1	1	1	1	1	1	1	1	1	1	1	1	1	1	1	1	2
C3202P694	3	3	3	3	3	3	3	3	3	3	3	3	3	3	3	3	3	3	3	3	3	3	3	3	2	2	2	2	1	2	1	1	3	2	1	3	2	2	2	1	2	2	3	1	1	1	2	2	3
C5629P638	2	2	3	1	3	2	2	3	1	3	2	1	1	1	2	2	1	1	1	3	2	2	2	1	2	3	3	3	3	3	3	2	2	2	3	3	3	2	2	2	3	2	3	2	2	3	2	2	3
C2227P432	3	3	3	3	3	3	3	3	3	3	3	3	3	3	3	3	3	3	3	3	3	3	3	3	2	2	2	2	1	2	1	2	3	2	1	3	2	2	2	1	2	2	3	1	1	1	2	2	3
C5856P240	2	2	1	1	2	1	1	2	1	1	2	3	2	2	2	3	2	1	1	1	3	2	2	2	2	2	2	3	2	3	2	2	2	2	1	3	1	2	1	2	2	1	1	2	1	3	2	1	2
C5493P190	1	1	1	1	1	1	1	1	1	1	1	1	1	1	1	1	1	1	1	1	1	1	1	1	1	2	2	1	1	2	1	1	2	2	2	2	1	1	2	2	1	2	1	1	2	1	2	1	2
C1421P510	2	2	2	2	3	3	3	3	2	2	1	2	1	2	3	3	3	2	3	2	1	2	3	2	2	2	3	1	2	2	1	2	2	3	3	3	2	2	2	2	1	2	2	2	2	1	2	2	2
C4284P405	3	3	3	3	3	3	3	3	3	3	3	3	3	3	3	3	3	3	3	3	3	3	3	3	2	2	2	2	3	2	1	2	3	2	2	3	2	2	2	1	2	1	3	2	3	1	2	3	2
C898P533	2	2	1	2	1	1	2	1	1	3	1	3	3	3	2	2	1	2	2	2	2	1	2	3	2	1	2	2	2	1	1	1	2	2	2	2	1	1	2	1	1	1	2	2	2	1	2	2	1
C2696P1802	3	3	3	3	3	3	3	3	3	3	3	3	3	3	3	3	3	3	3	3	3	3	3	3	2	2	1	2	1	3	2	1	3	2	3	2	1	2	3	2	2	2	3	2	2	2	2	2	1
C1497P555	1	1	1	1	1	1	1	1	1	1	1	1	1	1	1	1	1	1	1	1	1	1	1	1	1	1	1	1	1	1	1	1	1	1	1	1	1	1	1	1	1	1	1	1	1	1	1	1	3
C5847P279	1	2	2	1	2	1	1	2	1	6	1	1	1	1	1	2	1	1	1	2	2	1	2	1	2	1	2	2	2	2	2	1	1	1	2	2	2	1	1	1	2	1	2	1	1	2	1	1	3
C4410P610	2	1	2	1	1	1	1	1	2	1	2	1	6	2	2	2	2	2	1	1	1	1	1	2	3	2	3	3	3	3	3	3	2	2	3	3	3	3	3	3	2	2	3	3	2	2	2	2	1
C6848P565	3	3	3	3	3	3	3	3	3	3	3	3	3	3	3	3	3	3	3	3	3	3	3	2	2	1	2	2	2	1	1	1	2	1	1	1	2	2	1	1	2	2	1	1	2	2	1	2	3
C2180P437	3	2	3	2	2	2	3	2	2	4	2	2	4	3	2	2	2	2	2	3	3	3	2	3	3	2	3	2	3	3	2	2	3	3	3	2	2	2	2	2	3	2	3	2	2	2	3	2	2
C3075P208	2	2	2	2	2	3	3	2	2	3	3	2	1	3	2	3	1	1	1	2	1	1	1	1	3	3	3	3	3	3	3	3	3	3	3	3	3	3	3	3	3	3	3	3	3	3	3	3	3
C6114P648	3	3	3	3	3	3	3	3	3	3	3	3	3	3	3	3	3	3	3	3	3	3	3	3	1	2	2	1	2	1	2	2	1	1	1	2	2	1	1	2	2	2	1	1	1	2	2	2	3
C6041P172	2	2	1	2	2	3	2	3	2	3	1	1	3	2	3	2	1	2	1	2	2	1	2	3	3	3	3	3	3	3	3	3	3	3	3	3	3	3	3	3	3	3	3	3	3	3	3	3	3
C1309P200	2	2	1	2	1	3	2	2	1	2	2	1	1	1	3	2	2	3	3	3	2	2	1	3	1	1	1	1	1	1	1	1	1	1	1	1	1	1	1	1	1	1	1	1	1	1	1	1	1
C4606P737	2	1	1	1	1	2	2	2	2	2	1	2	1	2	2	2	1	1	2	2	2	2	1	2	2	2	1	2	2	1	3	3	2	2	3	2	1	3	3	3	1	1	1	3	3	1	1	1	3
C5653P801	2	2	2	2	3	2	2	2	3	2	2	3	3	3	1	2	2	1	1	1	2	2	3	1	2	2	3	1	2	2	2	1	1	3	2	2	2	1	2	3	2	2	1	1	3	1	2	2	3
C2317P439	2	2	2	1	2	3	3	3	2	2	1	2	1	2	3	3	3	2	3	2	1	2	3	2	2	2	2	1	2	3	1	2	2	3	3	3	2	2	2	2	1	2	2	1	2	1	2	2	3
C2683P159	3	3	3	3	3	3	3	3	3	3	3	3	3	3	3	3	3	3	3	3	3	3	3	3	3	3	3	3	3	3	3	3	3	3	3	3	3	3	3	3	3	3	3	3	3	3	3	3	3
C7565P477	2	1	1	1	2	2	2	2	2	2	1	2	1	2	2	2	2	2	2	2	1	1	2	2	1	1	1	1	1	1	1	1	1	1	1	1	1	1	1	1	1	1	1	1	1	1	1	1	1
C6370P434	1	1	1	1	1	1	1	1	1	2	1	1	2	1	1	1	1	1	1	1	1	1	1	2	1	1	1	1	1	1	1	1	1	1	1	1	1	1	1	1	1	1	1	1	1	1	1	1	2
C6467P94	2	2	1	1	2	3	3	3	2	1	1	2	1	2	3	2	3	3	3	3	1	2	3	2	1	2	1	1	1	2	1	2	1	2	2	2	1	2	2	1	1	1	2	1	2	1	2	2	1
C570P276	2	2	2	2	2	1	1	2	2	2	1	2	2	2	2	2	1	2	1	1	2	2	2	2	3	3	3	3	3	3	3	3	3	3	3	3	3	3	3	3	3	3	3	3	3	3	3	3	2
C4754P408	1	1	1	1	1	1	1	1	1	1	1	1	1	1	1	1	1	1	1	1	1	1	1	1	2	2	3	3	2	2	2	2	1	2	2	2	2	2	2	3	2	1	2	3	2	1	1	1	1
C4049P503	1	2	1	3	1	1	1	1	3	1	1	1	1	2	1	1	1	3	3	3	2	2	1	1	1	2	3	1	1	2	2	1	1	1	3	1	1	2	2	1	1	3	3	3	2	2	2	2	1
C8121P594	2	2	2	2	2	2	2	2	2	3	2	2	2	2	2	2	2	2	2	2	2	2	2	2	2	2	2	2	2	2	2	2	2	3	2	2	2	2	3	2	2	3	2	2	2	2	2	3	2
C6063P396	2	2	2	3	3	1	1	3	2	3	1	2	1	2	2	2	1	3	1	1	2	2	2	1	2	2	2	1	1	2	1	3	2	2	2	2	3	3	2	3	2	2	3	1	2	2	3	3	3
C6137P1923	2	3	2	2	3	3	2	2	2	1	2	3	2	3	3	3	2	3	3	2	2	3	3	1	3	3	3	3	3	3	3	3	3	3	3	3	3	3	3	3	3	3	3	3	3	3	3	3	2
C1963P1170	3	3	3	3	3	3	3	3	3	3	3	3	3	3	3	3	3	3	3	3	3	3	3	3	2	2	2	2	1	2	3	2	1	2	2	1	2	2	2	2	2	3	1	2	1	3	2	1	3
C4595P163	1	2	2	1	2	2	1	2	2	1	2	2	1	2	1	1	1	2	1	2	1	1	2	1	2	1	1	2	1	2	2	1	1	2	1	2	2	2	1	1	1	1	2	2	1	2	1	1	1
C7235P456	1	1	1	1	1	1	1	1	1	1	1	1	2	1	1	1	1	1	1	1	1	1	1	2	2	2	3	3	2	2	1	3	3	2	1	3	2	3	2	2	1	2	2	2	2	1	2	2	2
G19P216	2	1	2	2	2	2	2	1	1	2	1	1	2	2	2	2	2	1	2	1	1	1	2	2	2	2	2	2	2	2	2	2	3	2	2	3	2	3	2	2	3	2	3	1	1	1	2	2	3
C5182P66	2	2	3	3	3	2	1	3	3	2	3	2	3	3	1	2	2	3	1	2	1	2	1	2	1	1	1	1	1	1	1	1	1	1	1	1	1	1	1	1	1	1	1	1	1	1	1	1	3
C1140P567	2	3	3	3	2	2	3	3	3	2	3	2	3	2	2	2	3	2	2	3	3	2	2	2	2	2	3	2	3	1	2	3	1	2	1	2	3	2	1	2	2	2	1	2	2	2	2	2	2
C5342P697	2	2	2	3	2	1	1	3	3	1	1	3	2	2	2	2	2	1	2	3	2	1	3	2	3	3	3	3	3	3	3	3	3	3	3	3	3	3	3	3	3	3	3	3	3	3	3	3	2
C5322P733	2	3	3	3	2	2	2	2	2	2	3	2	2	2	2	2	2	2	2	2	3	3	2	1	3	3	3	3	3	3	3	3	3	3	3	3	3	3	3	3	3	3	3	3	3	3	3	3	2
C5931P2284	2	2	1	3	1	2	2	1	3	1	2	3	3	2	2	2	3	3	3	1	2	2	2	3	2	2	3	3	2	2	2	2	2	1	3	2	3	1	2	2	3	2	3	2	2	3	2	2	3
C4163P771	3	3	3	3	3	3	3	3	3	3	3	3	3	3	3	3	3	3	3	3	3	3	3	3	3	3	3	3	3	3	3	3	3	3	3	3	3	3	3	3	3	3	3	3	3	3	3	3	1
C346P140	2	1	1	1	1	2	2	2	2	2	1	2	1	2	2	2	1	1	2	2	2	2	1	2	1	2	1	2	2	1	2	2	2	1	2	2	1	2	2	2	1	1	1	2	2	1	1	1	3
C2959P902	1	1	1	1	1	1	1	1	1	1	1	1	1	1	1	1	1	1	1	1	1	1	1	1	1	1	1	1	1	1	1	1	1	1	1	1	1	1	1	1	1	1	1	1	1	1	1	1	2
C5104P874	2	2	3	3	2	3	3	3	3	2	1	1	2	2	2	1	3	3	3	3	1	2	2	1	2	2	3	2	3	2	2	3	1	1	3	2	2	3	2	3	2	2	2	3	2	2	3	2	3
C3605P437	1	1	1	1	1	1	1	1	1	1	1	1	1	1	1	1	1	1	1	1	1	1	1	1	2	1	2	2	2	1	1	1	2	2	2	2	1	1	2	1	1	1	2	2	2	1	2	2	1
C6991P1109	1	2	1	1	2	1	1	1	2	3	1	2	2	2	1	1	2	2	2	2	2	2	2	2	2	2	3	2	2	2	3	2	3	1	3	3	2	3	1	2	2	1	2	3	3	2	2	1	2
C5197P347	1	2	3	1	3	2	2	2	1	3	3	1	1	1	2	1	3	1	1	1	1	1	2	2	3	1	1	1	1	2	2	2	1	1	1	1	2	2	2	2	1	1	1	1	2	2	2	2	1
C4206P930	3	3	3	3	3	3	3	3	3	3	3	3	3	3	3	3	3	3	3	3	3	3	3	3	2	1	1	2	1	1	1	1	1	1	1	1	2	2	2	2	2	2	2	2	2	1	1	2	3
C3454P421	3	3	3	3	3	3	3	3	3	3	3	3	3	3	3	3	3	3	3	3	3	3	3	3	2	3	2	2	2	3	3	3	2	3	3	3	2	2	3	3	2	2	3	3	2	2	3	2	1
C6459P246	1	1	1	1	1	1	1	1	1	1	1	1	1	1	1	1	1	1	1	1	1	1	1	1	3	3	3	3	3	3	3	3	3	3	3	3	3	3	3	3	3	3	3	3	3	3	3	3	2
C3149P241	2	2	2	1	1	2	2	3	3	1	2	3	1	2	2	1	2	3	2	3	2	2	1	3	3	3	3	3	3	3	3	3	3	3	3	3	3	3	3	3	3	3	3	3	3	3	3	3	3
C2748P544	2	1	1	1	1	2	2	2	2	2	1	2	1	2	2	2	1	1	2	2	2	2	1	2	1	1	1	1	1	1	1	1	1	1	1	1	1	1	1	1	1	1	1	1	1	1	1	1	2
C5101P631	2	2	2	2	3	2	2	2	1	1	1	2	1	3	3	2	1	2	2	1	2	2	2	1	3	3	3	3	3	3	3	3	3	3	3	3	3	3	3	3	3	3	3	3	3	3	3	3	3
C1388P245	2	2	3	2	2	3	2	2	2	2	2	2	3	2	2	3	2	2	2	2	2	1	3	3	3	3	3	3	3	3	3	3	3	3	3	3	3	3	3	3	3	3	3	3	3	3	3	3	3
C2235P677	3	2	2	2	2	2	2	3	3	2	3	2	2	2	3	2	3	3	2	3	2	3	3	3	2	3	3	3	2	2	2	3	3	3	3	3	3	3	2	2	3	3	2	2	3	3	2	2	3
C3464P251	2	2	3	1	3	2	2	3	1	1	2	1	1	2	2	2	1	1	1	3	2	2	2	1	2	1	2	2	2	2	2	1	1	1	2	2	2	1	1	1	2	1	2	1	1	2	1	1	2
C6223P116	1	1	1	1	1	1	1	1	1	1	1	1	1	1	1	1	1	1	1	1	1	1	1	2	2	3	2	2	2	3	3	3	2	3	3	3	2	2	3	3	2	2	3	3	2	2	3	2	3
C3604P483	2	3	3	3	2	2	2	2	2	2	3	2	2	2	2	2	2	2	2	2	3	3	2	1	2	2	2	1	2	3	1	2	2	3	3	3	2	2	2	2	1	2	2	2	2	1	2	2	3
C4926P110	3	2	2	2	2	3	2	2	2	3	3	2	2	2	2	3	3	3	3	3	3	3	3	2	2	3	2	2	2	3	3	2	3	2	3	3	2	2	3	3	3	3	3	2	2	3	3	3	2
C5880P719	2	2	1	1	2	3	3	3	2	2	1	2	2	2	3	2	3	3	3	3	1	2	3	3	3	3	3	3	3	3	3	3	3	3	3	3	3	3	3	3	3	3	3	3	3	3	3	3	3
C6206P334	1	1	1	1	1	1	1	1	1	1	1	1	1	1	1	1	1	1	1	1	1	1	1	1	2	1	2	2	1	1	1	1	1	2	1	1	1	1	1	2	2	1	1	2	2	1	1	1	1
C4700P526	3	3	3	3	3	3	3	3	3	3	3	3	3	3	3	3	3	3	3	3	3	3	3	3	3	3	3	3	3	3	3	3	3	3	3	3	3	3	3	3	3	3	3	3	3	3	3	3	2
C2115P329	1	2	3	1	3	2	2	2	3	1	1	3	2	2	2	2	3	3	1	1	1	1	2	1	1	3	3	3	3	2	2	2	3	3	3	3	2	2	2	2	3	3	3	3	2	2	2	2	3
C1211P408	3	2	3	3	1	2	3	3	3	1	1	3	3	3	2	3	1	3	3	3	3	2	2	2	3	2	3	1	1	3	3	2	3	1	3	3	2	3	2	2	1	3	3	1	3	3	2	2	1
C6456P265	3	3	3	3	3	3	3	3	3	3	3	3	3	3	3	3	3	3	3	3	3	3	3	3	2	2	2	1	2	2	3	2	3	2	2	2	3	2	1	3	2	2	3	2	2	2	2	3	3
C4124P412	2	2	1	2	2	1	2	2	2	2	2	2	1	2	2	1	2	2	2	2	2	3	1	2	1	2	1	1	2	1	2	1	1	2	2	1	2	2	1	2	1	1	2	1	1	1	2	1	2
G14P49	1	1	1	1	1	1	1	1	1	1	1	1	1	1	1	1	1	1	1	1	1	1	1	1	1	1	1	1	1	1	1	1	1	1	1	1	1	1	1	1	1	1	1	1	1	1	1	1	2
C6406P297	2	2	1	1	2	3	3	3	2	1	1	2	1	2	3	2	3	3	3	3	1	2	3	2	1	2	1	1	1	2	1	2	1	2	2	2	1	2	2	1	1	1	2	1	2	1	2	2	2
C2152P698	3	3	3	3	3	3	3	3	3	3	3	3	3	3	3	3	3	3	3	3	3	3	3	3	2	2	2	1	2	2	3	2	3	2	2	2	3	2	1	3	2	2	3	2	2	2	2	3	2
C3580P598	2	2	2	2	2	1	1	2	3	3	1	2	2	2	2	2	1	2	1	1	2	2	2	2	3	3	3	3	3	3	3	3	3	3	3	3	3	3	3	3	3	3	3	3	3	3	3	3	2
G15P275	3	2	2	3	2	3	3	3	3	3	2	2	3	2	3	3	3	3	3	2	2	3	2	2	2	2	3	2	3	2	2	3	1	1	3	2	2	3	2	3	2	3	2	3	3	2	3	2	3
C1176P225	2	1	1	2	1	2	1	1	2	1	2	2	1	2	1	1	2	2	2	2	2	1	2	1	1	1	1	1	1	1	1	1	1	1	1	1	1	1	1	1	1	1	1	1	1	1	1	1	2
C2081P479	1	1	1	1	1	1	1	1	1	1	1	1	1	1	1	1	1	1	1	1	1	1	1	1	2	3	2	2	3	3	3	3	2	2	2	2	2	2	2	3	2	2	2	3	3	3	2	3	1
C3012P804	1	2	2	2	1	1	1	2	2	1	2	1	2	1	1	2	1	1	1	2	2	2	2	1	2	1	1	1	1	1	2	2	1	2	2	1	1	2	2	2	1	1	1	2	2	1	1	1	2
C7387P1672	2	2	3	1	2	1	3	1	2	2	1	1	2	2	2	2	2	2	2	3	3	1	2	2	2	2	3	1	1	2	2	2	2	2	3	2	3	2	1	2	2	2	3	1	1	3	3	3	2
C3769P735	2	2	2	3	2	3	3	1	2	3	1	2	3	2	3	3	2	1	2	2	2	1	2	2	1	1	1	1	1	1	1	1	1	1	1	1	1	1	1	1	1	1	1	1	1	1	1	1	3
C4138P571	2	2	1	1	1	2	3	1	2	2	1	2	1	1	3	2	2	1	3	2	3	1	3	2	2	2	1	2	2	2	3	2	2	3	1	3	2	2	2	1	2	1	3	3	1	3	1	2	1
C6157P765	3	3	3	3	3	3	3	3	3	3	3	3	3	3	3	3	3	3	3	3	3	3	3	3	3	2	2	3	3	2	2	3	3	2	2	3	2	3	3	3	2	2	2	3	3	2	3	2	1
C624P380	3	3	3	3	3	3	3	3	3	3	3	3	3	3	3	3	3	3	3	3	3	3	3	3	3	3	3	3	3	3	3	3	3	3	3	3	3	3	3	3	3	3	3	3	3	3	3	3	2
C645P837	1	1	1	1	1	1	1	1	1	1	1	1	1	1	1	1	1	1	1	1	1	1	1	1	3	3	3	0	0	3	0	3	3	3	0	3	3	3	3	0	3	3	3	0	0	0	3	3	3
C5315P102	3	3	3	3	3	3	3	3	3	3	3	3	3	3	3	3	3	3	3	3	3	3	3	3	3	2	2	3	3	3	2	2	2	2	2	2	2	3	3	3	3	2	2	3	3	2	2	2	3
C1124P470	3	3	3	3	3	3	3	3	3	3	3	3	3	3	3	3	3	3	3	3	3	3	3	3	3	3	3	3	3	3	3	3	3	3	3	3	3	3	3	3	3	3	3	3	3	3	3	3	3
C940P207	3	3	3	3	3	3	3	3	3	3	3	3	3	3	3	3	3	3	3	3	3	3	3	3	3	3	3	3	3	3	3	3	3	3	3	3	3	3	3	3	3	3	3	3	3	3	3	3	3
C1452P133	1	1	1	1	1	1	1	1	1	1	1	1	1	1	1	1	1	1	1	1	1	1	1	1	1	1	1	1	1	1	1	1	1	1	1	1	1	1	1	1	1	1	1	1	1	1	1	1	3
C966P443	2	1	2	2	1	1	2	2	2	2	2	1	1	1	1	1	2	1	1	2	2	1	1	1	1	2	2	1	2	1	2	2	1	1	1	2	2	1	1	2	2	2	1	1	1	2	2	2	2
C1590P91	1	2	2	1	1	1	1	2	2	1	2	1	2	1	1	2	1	1	1	2	2	2	2	1	2	1	1	1	1	1	2	2	1	2	2	1	1	2	2	2	1	1	1	2	2	1	1	1	2
C6295P1252	2	2	3	1	3	1	3	1	2	1	1	1	1	2	2	2	2	2	2	3	2	1	2	1	2	2	3	1	1	2	2	2	2	2	3	2	3	2	1	2	2	3	3	1	2	3	3	3	2
C6344P286	2	2	2	2	2	2	1	3	2	2	2	3	3	3	2	2	2	2	2	2	1	2	3	2	1	1	1	1	1	1	1	1	1	1	1	1	1	1	1	1	1	1	1	1	1	1	1	1	1
C1785P815	3	2	2	0	3	3	3	3	3	2	3	4	3	2	2	2	2	2	3	3	3	3	3	2	3	3	3	3	3	3	3	3	3	3	3	3	3	3	3	3	3	3	3	3	3	3	3	3	2
C7961P457	3	3	3	3	3	1	1	3	3	3	1	3	1	3	3	3	1	3	1	1	3	3	3	1	3	3	1	1	3	3	1	3	3	3	3	3	3	3	3	3	3	3	3	1	3	3	3	3	3
C2486P297	1	1	1	1	1	1	1	1	1	1	1	1	1	1	1	1	1	1	1	1	1	1	1	2	2	2	2	3	1	2	3	2	3	3	3	3	3	1	2	3	2	2	1	2	3	2	2	3	2
C4019P613	1	1	1	1	1	1	1	1	1	1	1	1	1	1	1	1	1	1	1	1	1	1	1	1	2	3	2	2	2	3	3	3	2	3	3	3	2	2	3	3	2	2	3	3	2	2	3	2	1
C5171P540	2	1	1	1	2	2	2	2	2	1	1	2	1	2	2	2	2	2	2	2	1	1	2	1	1	1	1	1	1	1	1	1	1	1	1	1	1	1	1	1	1	1	1	1	1	1	1	1	2
G14P439	1	1	1	1	1	1	1	1	1	1	1	1	1	1	1	1	1	1	1	1	1	1	1	1	1	1	1	1	1	1	1	1	1	1	1	1	1	1	1	1	1	1	1	1	1	1	1	1	2
C2609P215	1	1	1	1	1	1	1	1	1	1	1	1	1	1	1	1	1	1	1	1	1	1	1	1	2	2	3	2	1	2	3	2	3	1	3	3	2	2	1	3	2	1	2	3	2	2	3	1	1
C3491P173	3	3	3	3	3	3	3	3	3	3	3	3	3	3	3	3	3	3	3	3	3	3	3	3	3	3	3	3	3	3	3	3	3	3	3	3	3	3	3	3	3	3	3	3	3	3	3	3	1
C673P134	3	3	3	0	3	0	3	0	3	3	0	0	3	3	3	3	3	3	3	3	3	0	3	3	2	2	3	1	1	2	2	2	2	2	3	2	3	1	2	2	2	3	3	1	2	3	3	3	1
C2529P553	2	2	1	2	2	1	2	2	2	3	2	2	1	2	2	1	2	3	2	2	2	3	1	2	3	3	3	3	3	3	3	3	3	3	3	3	3	3	3	3	3	3	3	3	3	3	3	3	3
C299P192	3	3	3	3	3	3	3	3	3	3	3	3	3	3	3	3	3	3	3	3	3	3	3	3	2	2	3	1	2	2	3	2	3	2	2	2	3	2	1	3	2	2	3	2	2	2	2	3	2
C1406P345	2	2	2	1	2	3	2	2	2	2	1	1	2	2	3	3	1	3	2	2	2	2	2	3	1	1	1	1	1	1	1	1	1	1	1	1	1	1	1	1	1	1	1	1	1	1	1	1	2
C3211P1348	1	1	1	1	1	1	1	1	1	1	1	1	1	1	1	1	1	1	1	1	1	1	1	1	2	3	3	2	3	2	2	3	3	2	3	2	2	2	3	3	3	3	2	2	3	2	3	3	2
C4090P366	1	1	1	1	1	1	1	1	1	1	1	1	1	1	1	1	1	1	1	1	1	1	1	1	2	1	2	2	1	1	1	1	1	2	1	1	1	1	1	2	2	1	1	2	2	1	1	1	1
C3447P640	3	3	3	3	3	3	3	3	3	3	3	3	3	3	3	3	3	3	3	3	3	3	3	3	1	1	1	1	1	1	1	1	1	1	1	1	1	1	1	1	1	1	1	1	1	1	1	1	2
C2877P313	2	3	2	3	2	2	2	3	3	3	2	2	3	3	2	2	3	3	3	2	3	2	3	3	2	3	3	3	2	3	3	2	3	2	3	3	3	3	2	3	2	2	3	3	3	3	3	2	2
C926P130	3	3	3	3	3	3	3	3	3	3	3	3	3	3	3	3	3	3	3	3	3	3	3	3	3	3	3	3	3	3	3	3	3	3	3	3	3	3	3	3	3	3	3	3	3	3	3	3	2
C1852P130	2	1	1	2	2	1	2	2	2	1	2	2	1	1	1	1	1	2	2	1	2	1	1	1	1	3	2	2	2	2	2	2	2	2	2	2	2	2	2	2	2	2	2	2	2	2	2	2	3
C326P594	1	1	1	1	1	1	1	1	1	1	1	1	1	1	1	1	1	1	1	1	1	1	1	1	1	1	1	1	1	1	1	1	1	1	1	1	1	1	1	1	1	1	1	1	1	1	1	1	1
C3462P759	2	1	2	2	1	1	1	2	2	1	1	1	1	2	2	1	1	2	1	1	1	1	2	1	1	1	1	1	1	1	1	1	1	1	1	1	1	1	1	1	1	1	1	1	1	1	1	1	2
C5491P339	2	2	2	2	1	2	2	2	1	2	2	1	2	1	2	2	2	3	3	3	2	2	1	3	3	3	3	3	3	3	3	3	3	3	3	3	3	3	3	3	3	3	3	3	3	3	3	3	3
C5726P659	3	2	3	2	3	2	2	3	2	2	3	2	2	3	2	2	3	3	3	2	2	3	3	3	3	3	3	3	3	3	3	3	3	3	3	3	3	3	3	3	3	3	3	3	3	3	3	3	2
C7110P1528	1	1	1	1	1	1	1	1	1	1	1	1	1	1	1	1	1	1	1	1	1	1	1	1	1	2	2	1	3	1	1	2	3	2	1	2	1	1	3	1	2	3	3	3	2	1	1	2	1
C4326P158	3	3	3	3	3	3	3	3	3	3	3	3	3	3	3	3	3	3	3	3	3	3	3	3	2	3	3	3	2	3	3	2	3	2	3	3	3	3	2	3	2	2	3	3	3	3	3	2	3
C4925P249	1	1	1	1	1	1	1	1	1	1	1	1	1	1	1	1	1	1	1	1	1	1	1	1	2	2	1	2	3	2	1	2	1	3	1	1	2	2	3	1	2	3	2	1	2	2	1	3	2
C182P470	1	1	1	1	1	1	1	1	1	1	1	1	1	1	1	1	1	1	1	1	1	1	1	1	2	2	2	2	3	3	3	3	3	2	3	3	2	2	3	2	1	2	2	1	1	3	2	2	1
C5955P626	2	2	1	2	2	2	2	2	2	1	2	3	2	3	2	2	1	2	1	2	2	2	2	1	2	2	2	2	3	2	1	2	3	2	2	3	2	2	2	1	2	1	3	2	3	1	2	3	1
C3846P887	2	1	1	1	2	2	2	2	2	2	2	2	1	2	1	2	1	1	1	1	1	1	1	1	2	2	1	2	2	2	1	1	1	2	2	2	1	3	2	2	2	1	2	2	1	1	2	3	1
C2600P690	3	2	2	2	2	2	2	3	3	2	3	2	2	2	3	2	3	3	2	3	2	3	3	3	3	3	3	3	3	3	3	3	3	3	3	3	3	3	3	3	3	3	3	3	3	3	3	3	3
C3011P342	1	2	1	1	1	2	1	1	1	1	2	2	2	1	1	2	2	2	2	2	1	2	2	1	1	2	2	1	2	1	2	2	1	1	1	2	2	1	1	2	2	2	1	1	1	2	2	2	2
C2330P483	1	2	1	1	1	2	1	1	1	1	3	2	2	1	1	2	3	2	2	3	1	2	2	1	3	3	3	3	3	3	3	3	3	3	3	3	3	3	3	3	3	3	3	3	3	3	3	3	1
C5460P1219	2	1	2	2	2	1	1	2	2	2	2	1	3	2	1	2	2	2	1	1	1	2	1	2	1	2	2	1	2	1	2	2	2	2	1	2	1	1	2	1	2	1	2	2	1	2	1	1	3
C7112P826	3	3	3	3	3	3	3	3	3	3	3	3	3	3	3	3	3	3	3	3	3	3	3	3	3	3	3	3	3	3	3	3	3	3	3	3	3	3	3	3	3	3	3	3	3	3	3	3	3
C1354P320	2	1	1	2	1	1	1	2	2	1	1	1	2	2	1	1	2	2	2	1	2	1	2	1	3	3	3	3	3	3	3	3	3	3	3	3	3	3	3	3	3	3	3	3	3	3	3	3	1
C5806P60	3	3	3	3	3	3	3	3	3	3	3	3	3	3	3	3	3	3	3	3	3	3	3	3	2	2	2	2	2	2	2	1	2	2	2	1	2	2	2	2	1	1	2	2	2	2	1	1	3
C2815P387	1	1	1	1	1	1	1	1	1	1	1	1	1	1	1	1	1	1	1	1	1	1	1	1	2	3	2	2	2	2	2	3	3	2	2	2	2	2	2	2	3	3	3	3	3	2	2	2	2
C1934P740	3	3	3	3	3	3	3	3	3	3	3	3	3	3	3	3	3	3	3	3	3	3	3	3	1	1	1	1	1	1	1	1	1	1	1	1	1	1	1	1	1	1	1	1	1	1	1	1	2
C5292P259	3	3	3	3	3	3	3	3	3	3	3	3	3	3	3	3	3	3	3	3	3	3	3	3	3	3	3	3	3	3	3	3	3	3	3	3	3	0	3	3	3	3	3	3	3	3	3	3	1
C961P288	3	2	3	2	2	3	3	3	3	2	3	3	2	2	2	3	2	2	3	3	3	3	2	1	3	1	2	2	2	2	2	2	2	2	2	2	2	2	2	2	2	2	2	2	2	2	2	2	1
C1981P212	2	2	3	2	3	2	2	1	2	2	1	2	3	2	2	3	2	2	2	3	2	1	2	2	2	2	2	1	2	2	2	2	1	2	2	2	2	2	2	2	2	2	2	2	2	2	2	2	1
C5139P429	3	3	3	3	3	3	3	3	3	3	3	3	3	3	3	3	3	3	3	3	3	3	3	3	1	2	2	2	2	2	1	2	2	1	2	2	2	2	2	2	1	1	2	2	2	1	2	1	2
C5248P410	3	2	2	2	3	3	2	3	3	3	2	2	2	3	3	3	3	2	2	3	3	2	3	2	3	3	3	3	3	3	3	3	3	3	3	3	3	3	3	3	3	3	3	3	3	3	3	3	3
C2584P358	1	2	2	1	1	2	2	1	1	3	2	1	2	2	2	2	2	1	1	1	1	2	2	2	3	3	3	3	3	3	3	3	3	3	3	3	3	3	3	3	3	3	3	3	3	3	3	3	3
C1259P2184	3	2	2	3	3	2	2	2	2	3	3	3	3	2	3	3	2	2	2	2	3	3	3	2	2	2	2	2	2	2	3	2	1	2	2	2	1	1	2	2	1	2	1	3	2	2	2	2	2
C5425P663	2	3	3	2	2	2	2	2	3	2	3	2	3	3	3	3	3	3	2	2	2	2	2	3	3	2	3	3	3	3	3	3	2	2	3	3	3	3	3	3	2	2	3	3	2	2	2	2	3
C5879P205	1	1	1	1	1	1	1	1	1	1	1	1	1	1	1	1	1	1	1	1	1	1	1	1	2	2	2	1	2	3	1	2	2	3	3	3	2	2	2	2	1	2	2	1	2	1	2	2	2
C4388P391	1	1	1	1	1	1	1	1	1	1	1	1	1	1	1	1	1	1	1	1	1	1	1	1	2	2	1	1	1	1	1	2	2	2	1	1	1	1	2	2	2	2	2	3	2	1	1	1	2
C8123P1427	2	2	3	3	2	1	1	2	2	1	3	1	2	1	1	2	3	2	1	2	2	2	3	2	3	3	3	3	3	3	3	3	3	3	3	3	3	3	3	3	3	3	3	3	3	3	3	3	2
C5048P133	3	3	3	3	3	3	3	3	3	3	3	3	3	3	3	3	3	3	3	3	3	3	3	3	1	1	1	1	1	1	1	1	1	1	1	1	1	1	1	1	1	1	1	1	1	1	1	1	2
C3316P495	3	3	3	3	3	3	3	3	3	3	3	3	3	3	3	3	3	3	3	3	3	3	3	3	3	2	3	3	2	2	2	2	2	3	3	2	3	2	3	2	2	3	2	3	3	3	3	2	3
C7463P851	2	3	3	2	3	2	3	2	2	3	2	2	3	3	3	3	3	2	2	3	3	2	3	3	2	2	3	1	1	2	2	2	2	2	3	2	3	2	1	2	2	2	3	1	1	3	3	3	2
C2803P689	2	1	2	1	2	2	1	2	1	1	2	1	1	1	2	1	1	1	1	2	1	2	1	1	2	1	2	2	2	2	2	1	1	1	2	2	2	1	1	1	2	1	2	1	1	2	1	1	2
C235P283	1	1	1	1	1	1	1	1	1	1	1	1	1	1	1	1	1	1	1	1	1	1	1	1	2	1	1	2	2	1	2	2	1	2	2	1	2	2	1	2	2	1	1	2	2	2	2	1	1
C4855P550	3	3	3	3	3	3	3	3	3	3	3	3	2	3	3	3	3	3	3	3	3	3	3	3	3	3	3	3	3	3	3	3	3	3	3	3	3	3	3	3	3	3	3	3	3	3	3	3	3
C2553P621	2	2	2	3	3	1	1	3	2	3	1	2	1	2	2	2	1	3	1	1	2	2	2	1	2	3	3	3	3	3	3	2	2	2	3	2	2	2	2	2	2	2	2	3	3	3	2	2	1
C2772P203	3	3	3	3	3	3	3	3	3	3	3	3	3	3	3	3	3	3	3	3	3	3	3	3	2	3	2	2	2	2	2	3	3	2	2	2	2	2	2	2	3	3	3	3	3	2	2	2	2
C942P388	1	1	1	1	1	1	1	1	1	1	1	1	1	1	1	1	1	1	1	1	1	1	1	1	2	2	2	1	2	2	1	2	2	3	3	3	2	2	2	2	1	2	2	2	2	1	2	2	1
C5312P210	1	1	1	1	1	1	1	1	1	1	1	1	1	1	1	1	1	1	1	1	1	1	1	1	2	1	2	2	1	1	1	1	2	2	1	2	1	1	1	2	2	1	2	1	2	1	1	1	1
C1453P117	3	2	2	3	3	3	3	2	2	3	2	3	2	3	3	2	3	3	3	2	2	2	2	3	1	2	1	2	2	1	1	2	2	1	1	2	1	2	2	2	1	1	1	2	2	1	2	1	2
C419P225	2	3	2	3	2	2	2	3	3	1	2	2	2	3	2	2	3	3	3	2	3	2	3	2	2	2	3	2	1	2	3	2	3	1	3	3	2	2	1	3	2	1	2	3	2	2	3	1	3
C1193P341	2	2	2	2	1	1	2	2	2	1	3	2	2	1	2	2	3	3	1	3	1	3	3	2	1	1	1	1	1	1	1	1	1	1	1	1	1	1	1	1	1	1	1	1	1	1	1	1	1
C460P293	3	3	3	3	3	3	3	3	3	3	3	3	3	3	3	3	3	3	3	3	3	3	3	3	3	2	2	3	3	3	2	3	2	2	2	2	2	3	3	3	3	3	2	3	3	2	2	2	3
C1695P80	1	1	1	1	1	1	1	1	1	1	1	1	1	1	1	1	1	1	1	1	1	1	1	1	1	1	1	1	1	1	1	1	1	1	1	1	1	1	1	1	1	1	1	1	1	1	1	1	1
C2861P95	2	3	3	3	2	2	2	2	2	2	3	2	2	2	2	2	2	2	2	2	3	3	2	1	2	2	2	1	2	3	1	2	2	3	3	3	2	2	2	2	1	2	2	1	2	1	2	2	2
C7958P547	3	3	3	3	3	3	3	3	3	3	3	3	2	3	3	3	3	3	3	3	3	3	3	3	1	1	1	1	1	1	1	1	1	1	1	1	1	1	1	1	1	1	1	1	1	1	1	1	1
C6229P771	1	1	1	1	1	1	1	1	1	1	1	1	1	1	1	1	1	1	1	1	1	1	1	1	1	1	1	1	1	1	1	1	1	1	1	1	1	1	1	1	1	1	1	1	1	1	1	1	1
C3900P464	2	2	2	2	3	3	2	2	2	1	1	2	1	3	2	2	1	1	3	1	3	1	1	2	1	1	1	1	1	1	1	1	1	1	1	1	1	1	1	1	1	1	1	1	1	1	1	1	3
C22P657	3	3	3	3	3	3	3	3	3	3	3	3	3	3	3	3	3	3	3	3	3	3	3	3	3	1	2	3	3	0	1	1	2	1	1	1	2	3	0	0	3	2	1	0	3	2	1	2	3
C1447P327	3	3	3	3	3	3	3	3	3	3	3	3	3	3	3	3	3	3	3	3	3	3	3	3	2	2	2	3	3	2	2	2	2	2	1	2	2	2	2	2	2	2	2	3	2	2	2	2	2
C2716P354	3	3	3	3	3	3	3	3	3	3	3	3	2	3	3	3	3	3	3	3	3	3	3	3	2	2	3	2	3	2	2	1	1	2	2	2	2	1	2	3	3	2	1	1	3	2	2	2	1
C3944P361	3	3	3	3	3	3	3	3	3	3	3	3	3	3	3	3	3	3	3	3	3	3	3	3	3	3	3	3	3	3	3	3	3	3	3	3	3	3	3	3	3	3	3	3	3	3	3	3	3
C4293P414	3	2	3	3	2	3	3	2	3	3	2	3	3	2	3	2	2	2	3	3	2	2	2	3	1	1	1	1	1	1	1	1	1	1	1	1	1	1	1	1	1	1	1	1	1	1	1	1	1
C1057P736	1	1	1	1	1	1	1	1	1	1	1	1	1	1	1	1	1	1	1	1	1	1	1	1	1	1	1	1	1	1	1	1	1	1	1	1	1	1	1	1	1	1	1	1	1	1	1	1	2
C1460P913	2	2	2	1	1	2	2	3	3	1	2	2	1	2	1	1	2	3	2	3	2	2	1	3	3	3	3	3	3	3	0	3	3	3	3	3	3	3	3	0	3	3	3	0	3	3	3	3	3
C5889P724	3	3	3	3	3	3	3	3	3	3	3	3	2	3	3	3	3	3	3	3	3	3	3	3	3	3	3	3	3	3	3	3	3	3	3	3	3	3	3	3	3	3	3	3	3	3	3	3	2
C6124P605	2	2	2	3	3	2	1	2	2	2	3	2	2	3	1	2	3	3	2	1	1	3	1	2	2	3	3	2	3	2	2	3	3	2	3	2	2	2	3	3	3	3	2	2	3	2	3	3	2
C7987P244	1	1	1	1	1	1	1	1	1	1	1	1	1	1	1	1	1	1	1	1	1	1	1	1	2	1	1	2	2	1	2	2	1	2	2	1	2	2	1	2	2	1	1	2	2	2	2	1	2
C1551P943	3	2	3	3	2	2	2	2	2	3	2	2	3	3	3	3	3	3	2	2	2	2	2	3	1	2	1	1	2	1	1	1	2	2	1	2	1	1	1	1	1	2	1	1	2	2	2	2	2
C3882P430	2	3	3	3	2	2	3	3	3	2	3	2	3	2	2	2	3	2	2	3	3	2	2	1	1	2	2	1	2	2	2	1	1	1	2	2	1	1	2	2	1	1	2	1	2	1	2	1	2
C7168P392	1	2	2	2	2	2	2	1	1	1	1	2	1	1	1	2	1	1	2	1	2	1	1	1	1	2	1	1	2	1	2	2	1	1	2	2	1	2	2	2	2	1	2	2	2	2	1	1	1
C4279P1962	2	2	2	1	2	3	2	2	2	2	1	1	2	2	3	3	1	3	1	2	1	2	2	3	2	3	3	2	2	2	3	3	3	3	2	3	3	2	2	3	2	2	3	3	2	2	3	3	3
C495P1032	3	3	3	3	3	3	3	3	3	3	3	3	3	3	3	3	3	3	3	3	3	3	3	3	1	1	1	1	1	1	1	1	1	1	1	1	1	1	1	1	1	1	1	1	1	1	1	1	2
C6316P224	2	2	1	1	2	3	3	3	2	2	1	2	2	2	3	2	3	3	3	3	1	2	3	3	2	1	2	1	2	2	1	1	2	2	2	2	2	2	1	2	1	1	1	1	1	1	2	1	3
C4372P90	3	3	3	3	3	3	3	3	3	3	3	3	3	3	3	3	3	3	3	3	3	3	3	3	1	2	1	1	1	1	1	1	2	2	1	1	1	1	1	1	2	2	1	1	2	1	2	2	3
C5015P146	3	3	3	3	3	3	3	3	3	3	3	3	3	3	3	3	3	3	3	3	3	3	3	3	1	1	1	1	1	1	1	1	1	1	1	1	1	1	1	1	1	1	1	1	1	1	1	1	3
C5989P534	3	3	3	3	3	3	3	3	3	3	3	3	3	3	3	3	3	3	3	3	3	3	3	3	2	1	2	2	2	1	1	1	2	1	1	1	2	2	1	1	2	2	1	1	2	2	1	2	3
C1000P448	1	1	1	1	1	1	1	1	1	1	1	1	1	1	1	1	1	1	1	1	1	1	1	1	1	2	2	1	2	2	2	2	1	1	2	2	1	2	1	2	1	1	2	2	2	1	2	1	2
C5904P630	3	3	3	3	3	3	3	3	3	3	3	3	3	3	3	3	3	3	3	3	3	3	3	3	3	3	3	3	3	3	3	3	3	3	3	3	3	3	3	3	3	3	3	3	3	3	3	3	3
C1601P308	1	1	1	1	1	1	1	1	1	2	1	1	2	1	1	1	1	1	1	1	1	1	1	2	3	2	2	2	3	3	3	2	3	2	2	3	3	2	2	3	2	2	3	2	3	3	3	3	2
C2062P1292	3	3	3	3	3	3	3	3	3	3	3	3	3	3	3	3	3	3	3	3	3	3	3	3	3	3	3	3	3	3	3	3	3	3	3	3	3	3	3	3	3	3	3	3	3	3	3	3	2
C4470P752	2	2	1	2	2	2	2	2	2	3	2	3	3	3	2	1	1	2	1	2	2	2	2	3	2	2	2	2	3	2	1	2	3	2	2	3	2	1	2	1	2	1	3	2	3	1	2	3	1
C297P539	1	1	1	1	1	1	1	1	1	1	1	1	1	1	1	1	1	1	1	1	1	1	1	1	1	3	2	2	1	1	1	2	2	2	1	1	2	1	2	1	2	2	1	1	1	2	1	1	3
C7313P621	2	1	2	2	2	2	2	1	1	2	1	1	2	2	2	2	2	1	2	1	1	1	2	1	2	2	2	2	2	2	2	2	3	2	2	3	2	3	2	2	3	2	3	1	1	1	2	2	1
C5967P248	3	3	3	3	3	3	3	3	3	1	3	3	3	3	3	3	3	3	3	3	3	3	3	3	1	2	2	1	1	2	1	2	2	2	2	1	2	1	2	2	2	2	2	2	1	2	2	2	1
C4114P1160	3	2	2	2	2	3	2	2	2	3	3	2	2	2	2	3	3	3	3	3	3	3	3	2	2	3	2	2	2	3	3	2	3	2	3	3	2	2	3	3	3	3	3	2	2	3	3	3	2
C958P394	2	2	2	2	2	2	2	2	2	2	2	2	2	2	2	2	2	2	2	2	2	2	2	2	2	2	2	2	2	2	2	2	2	2	2	2	2	2	2	2	2	2	2	2	2	2	2	2	2
C8080P85	2	2	2	2	3	2	2	2	3	2	2	3	2	3	2	2	2	1	1	1	2	2	3	1	2	2	3	1	2	2	2	1	2	3	2	2	2	1	2	3	2	3	1	1	3	1	2	2	2
C1786P451	2	2	2	2	2	2	2	2	2	2	2	2	2	2	2	2	2	2	2	2	2	2	2	2	3	3	3	3	3	3	3	3	3	3	3	3	3	3	3	0	3	3	2	3	3	3	3	3	3
C6254P314	2	2	2	2	2	2	2	2	1	2	1	2	2	2	1	2	2	2	2	2	2	2	2	2	2	1	1	1	2	2	2	2	2	1	2	2	2	2	2	1	1	2	2	1	1	2	2	2	3
C2211P927	1	1	1	1	1	1	1	1	1	1	1	1	1	1	1	1	1	1	1	1	1	1	1	1	2	2	2	2	2	2	2	2	1	2	2	1	2	1	2	2	1	2	1	3	3	3	2	2	2
C5391P356	2	2	1	2	2	3	2	1	2	1	2	2	2	1	2	3	2	2	2	2	2	3	2	3	1	1	1	1	1	1	1	1	1	1	1	1	1	1	1	1	1	1	1	1	1	1	1	1	1
C13P288	1	2	2	2	1	1	1	1	2	2	1	2	2	2	1	1	2	2	2	2	2	2	1	2	3	3	3	3	3	3	3	3	3	3	3	3	3	3	3	3	3	3	3	3	3	3	3	3	3
C6125P318	3	3	3	3	3	3	3	3	3	3	3	3	3	3	3	3	3	3	3	3	3	3	3	3	2	2	3	2	3	2	2	1	1	3	2	2	2	1	2	3	3	2	1	1	3	2	2	2	2
C7094P244	1	1	1	1	1	1	1	1	1	1	1	1	1	1	1	1	1	1	1	1	1	1	1	1	1	1	1	1	1	1	1	1	1	1	1	1	1	1	1	1	1	1	1	1	1	1	1	1	2
C562P821	1	1	1	1	1	1	1	1	1	1	1	1	0	1	1	1	1	1	1	1	1	1	1	1	2	2	3	2	2	2	1	2	2	1	3	1	2	2	2	3	2	3	1	1	3	1	3	2	1
C4287P624	3	3	3	3	3	3	3	3	3	3	3	3	3	3	3	3	3	3	3	3	3	3	3	3	1	1	1	1	1	1	1	1	1	1	1	1	1	1	1	1	1	1	1	1	1	1	1	1	1
C2153P373	1	1	1	1	1	1	1	1	1	1	1	1	1	1	1	1	1	1	1	1	1	1	1	1	2	2	1	3	3	2	2	2	2	2	1	2	1	2	3	2	2	2	1	3	3	1	1	1	2
C6700P474	3	3	3	3	3	3	3	3	3	3	3	3	3	3	3	3	3	3	3	3	3	3	3	3	2	2	2	2	1	1	3	2	1	3	3	1	2	2	2	2	2	2	2	2	2	2	1	2	3
C1243P108	1	1	1	1	1	1	1	1	1	1	1	1	1	1	1	1	1	1	1	1	1	1	1	1	3	3	3	3	3	3	3	3	3	3	3	3	3	3	3	3	3	3	3	3	3	3	3	3	2
C4246P687	1	1	1	1	1	1	1	1	1	1	1	1	1	1	1	1	1	1	1	1	1	1	1	1	1	1	1	1	1	1	1	1	1	1	1	1	1	1	1	1	1	1	1	1	1	1	1	1	2
C2859P144	3	3	3	3	3	3	3	3	3	3	3	3	3	3	3	3	3	3	3	3	3	3	3	3	3	3	3	3	3	3	3	3	3	3	3	3	3	3	3	3	3	3	3	3	3	3	3	3	3
C3639P536	2	2	3	2	3	3	2	2	3	3	3	1	2	1	2	2	3	2	2	2	2	3	2	3	2	2	2	1	2	3	3	2	1	2	2	1	2	2	2	2	3	2	1	2	1	3	2	2	2
C6794P604	3	1	3	3	1	1	1	3	3	1	1	1	1	3	3	1	1	3	1	1	1	1	3	1	3	1	1	3	3	1	3	3	1	3	3	1	3	3	1	3	3	1	1	3	3	3	3	1	1
C5016P330	2	2	1	2	2	1	2	2	1	3	2	3	3	3	2	2	1	2	1	2	2	1	2	3	2	2	2	2	1	2	3	2	1	2	2	1	2	2	2	2	2	3	1	2	1	3	2	1	3
C4336P681	3	3	3	3	3	3	3	3	3	3	3	3	3	3	3	3	3	3	3	3	3	3	3	3	2	3	3	3	3	3	2	2	3	2	2	3	3	2	2	2	3	3	3	2	2	3	3	3	1
C5240P845	3	3	3	3	3	3	3	3	3	3	3	3	3	3	3	3	3	3	3	3	3	3	3	3	2	2	2	2	1	2	1	2	3	2	1	3	2	2	2	1	2	2	3	1	1	1	2	2	3
C1051P597	3	3	3	3	3	3	3	3	3	3	3	3	3	3	3	3	3	3	3	3	3	3	3	3	2	2	2	1	3	2	1	1	2	1	2	2	3	2	1	2	2	2	2	2	2	3	3	1	2
C2791P471	3	3	3	3	3	3	3	3	3	3	3	3	3	3	3	3	3	3	3	3	3	3	3	3	3	3	3	3	3	3	3	3	3	3	3	3	3	3	3	3	3	3	3	3	3	3	3	3	2
C6641P648	1	1	1	1	1	1	1	1	1	1	1	1	2	1	1	1	1	1	1	1	1	1	1	2	3	1	2	3	1	1	2	2	2	3	0	1	2	1	1	3	3	2	1	1	2	2	3	0	1
C3620P685	2	2	1	3	1	2	2	1	3	1	2	3	3	2	2	2	3	3	3	1	2	2	2	3	2	2	2	2	3	2	3	1	1	2	2	3	2	2	1	1	2	1	2	1	1	2	1	1	1
C8071P339	2	2	2	2	3	3	3	3	2	2	1	2	2	2	3	3	2	2	3	2	1	2	3	3	2	2	3	2	3	2	1	2	2	3	3	2	2	2	2	2	1	2	2	2	1	2	2	2	2
C1431P926	2	2	2	2	2	1	1	2	2	2	1	2	2	2	2	2	1	2	1	1	2	2	2	2	2	2	2	3	2	2	3	1	2	2	2	2	1	1	2	1	1	2	2	3	2	2	1	2	3
C3354P1993	3	3	3	3	3	3	3	3	3	3	3	3	3	3	3	3	3	3	3	3	3	3	3	3	1	3	2	2	2	2	2	2	2	2	2	2	2	2	2	2	2	2	2	2	2	2	2	2	0
C6805P737	1	1	1	1	1	1	1	1	1	1	1	1	1	1	1	1	1	1	1	1	1	1	1	1	3	3	3	3	3	3	3	3	3	3	3	3	3	3	3	3	3	3	3	3	3	3	3	3	2
C667P485	2	2	2	3	2	1	1	1	2	2	3	2	3	2	1	2	1	1	1	1	3	2	1	2	3	3	3	3	3	3	3	3	3	3	3	3	3	3	3	3	3	3	3	3	3	3	3	3	2
C2942P539	2	2	2	2	2	3	3	2	1	1	3	2	3	2	2	2	3	2	3	3	2	2	2	3	3	3	3	3	3	3	3	3	3	3	3	3	3	3	3	3	3	3	3	3	3	3	3	3	3
C2712P374	1	1	1	1	1	1	1	1	1	1	1	1	1	1	1	1	1	1	1	1	1	1	1	1	2	2	3	2	3	2	2	3	1	1	3	2	2	3	2	3	2	2	2	3	2	2	3	2	3
C2459P1156	2	2	2	2	2	3	3	2	1	1	3	2	3	2	2	2	3	2	3	3	2	2	2	3	2	2	2	1	2	2	1	3	3	2	2	3	3	2	3	3	3	2	2	1	2	2	3	2	2
C3635P372	3	1	2	2	2	2	2	2	2	3	2	2	2	2	2	2	2	2	2	2	2	2	2	3	2	2	3	2	3	2	2	2	1	2	2	2	2	2	2	2	1	2	2	2	3	1	2	1	2
C2300P781	3	3	3	3	3	3	3	3	3	3	3	3	3	3	3	3	3	3	3	3	3	3	3	3	3	2	2	2	2	2	2	2	3	3	2	2	3	2	3	2	3	3	3	2	3	2	2	3	3
C3714P2699	3	3	3	3	3	3	3	3	3	3	3	3	3	3	3	3	3	3	3	3	3	3	3	3	2	3	2	2	2	3	2	2	2	2	2	2	3	2	3	2	3	2	3	2	3	2	2	3	3
C2901P471	1	1	1	1	1	1	1	1	1	1	1	1	1	1	1	1	1	1	1	1	1	1	1	1	2	2	2	1	1	2	1	2	3	2	1	3	2	2	2	1	2	2	3	1	1	1	2	2	2
C424P1719	1	2	2	2	2	2	1	2	2	1	1	2	1	1	2	1	1	1	2	1	2	2	2	1	2	1	2	2	1	1	1	1	1	2	1	1	1	1	1	2	2	1	1	2	2	1	1	1	1
C43P413	3	3	3	3	3	3	3	3	3	3	3	3	3	3	3	3	3	3	3	3	3	3	3	3	3	3	3	3	3	3	3	3	3	3	3	3	3	3	3	3	3	3	3	3	3	3	3	3	3
C2582P1581	1	1	1	1	1	1	1	1	1	1	1	1	1	1	1	1	1	1	1	1	1	1	1	1	2	2	2	2	1	2	1	2	3	2	1	3	2	2	2	1	2	2	3	1	1	1	2	2	1
C1417P367	3	2	2	2	2	2	2	2	3	3	3	3	3	3	2	2	2	3	2	3	3	2	2	3	3	3	3	3	3	3	3	3	3	3	3	3	3	3	3	3	3	3	3	3	3	3	3	3	1
C205P309	1	1	1	1	1	1	1	1	1	1	1	1	1	1	1	1	1	1	1	1	1	1	1	1	2	2	2	1	1	2	1	2	3	2	1	3	2	2	2	1	2	2	3	1	1	1	2	2	1
C5951P411	2	1	3	2	3	1	1	1	1	1	1	2	3	1	3	3	3	3	2	2	1	1	3	2	2	2	1	1	2	2	3	2	1	2	3	1	2	1	2	2	3	1	2	3	3	3	2	2	1
C3501P506	1	1	1	1	1	1	1	1	1	1	1	1	1	1	1	1	1	1	1	1	1	1	1	1	2	2	1	1	2	2	3	1	1	3	3	1	2	1	2	2	3	2	2	2	2	3	2	2	3
C2496P64	1	1	1	1	1	1	1	1	1	1	1	1	1	1	1	1	1	1	1	1	1	1	1	1	1	1	1	1	0	1	1	1	1	1	1	1	1	0	1	1	1	1	0	1	1	1	1	1	1
C2602P515	2	3	2	2	3	3	3	2	2	3	3	3	3	2	2	3	3	2	3	3	3	3	2	3	3	3	3	3	3	3	3	3	3	3	3	3	3	3	3	3	3	3	3	3	3	3	3	3	3
C3936P321	1	1	1	1	1	1	1	1	1	1	1	1	1	1	1	1	1	1	1	1	1	1	1	2	1	2	2	1	1	2	2	1	2	2	2	2	2	1	1	1	1	1	2	1	1	2	2	1	1
C3365P583	3	3	3	1	1	3	3	3	3	3	0	3	3	3	3	3	3	1	3	3	3	3	3	0	3	3	3	3	3	3	3	3	3	3	3	3	3	3	3	3	3	3	3	3	3	3	3	3	2
C2658P343	3	2	2	3	3	3	2	2	3	1	3	2	2	2	3	2	2	3	2	2	2	3	3	3	3	3	3	3	3	3	3	3	3	3	3	3	3	3	3	3	3	3	3	3	3	3	3	3	3
C1947P134	1	3	2	2	2	2	2	2	2	2	2	2	2	2	2	2	2	2	2	2	2	2	2	2	2	2	2	2	1	2	1	2	2	2	2	2	2	3	1	3	2	2	1	1	2	3	2	2	2
C2566P384	1	1	1	1	1	1	1	1	1	1	1	1	1	1	1	1	1	1	1	1	1	1	1	1	2	1	1	1	1	1	1	2	2	1	1	1	1	1	1	1	2	2	2	2	2	1	1	1	1
C7827P781	2	2	2	1	1	1	2	3	2	1	2	2	1	2	1	1	2	3	2	3	2	2	1	3	2	3	2	2	3	3	3	3	2	2	2	2	2	2	2	3	2	2	2	3	3	3	2	3	3
C1395P273	2	1	1	2	1	2	1	2	2	1	2	2	1	1	1	1	1	2	2	1	1	2	1	1	1	1	1	1	1	1	1	1	1	1	1	1	1	1	1	1	1	1	1	1	1	1	1	1	1
C5628P417	1	1	1	1	1	1	1	1	1	1	1	1	1	1	1	1	1	1	1	1	1	1	1	1	2	2	2	2	3	2	3	2	1	2	3	1	2	2	2	3	2	2	1	3	3	3	2	2	2
C5713P784	1	1	1	1	1	1	1	1	1	1	1	1	1	1	1	1	1	1	1	1	1	1	1	1	3	3	3	3	3	3	3	3	3	3	3	3	3	3	3	3	3	3	3	3	3	3	3	3	2
C5886P1710	1	1	1	1	1	1	1	1	1	1	1	1	1	1	1	1	1	1	1	1	1	1	1	1	1	1	1	1	1	1	1	1	1	1	1	1	1	1	1	1	1	1	1	1	1	1	1	1	1
C3610P412	2	3	3	2	2	2	2	2	3	3	3	2	3	3	3	3	3	3	2	2	2	2	2	3	3	3	3	3	3	3	3	3	3	3	3	3	3	3	3	3	3	3	3	3	3	3	3	3	3
C533P250	3	3	3	3	3	3	3	3	3	3	3	3	3	3	3	3	3	3	3	3	3	3	3	3	2	1	2	2	1	1	2	2	2	2	1	1	2	1	1	2	2	2	1	1	2	2	2	1	2
C393P1212	3	3	3	3	3	3	3	3	3	3	3	3	3	3	3	3	3	3	3	3	3	3	3	3	1	2	1	1	1	1	1	1	2	2	1	1	1	1	1	1	2	2	1	1	2	1	2	2	3
C1832P509	1	1	1	1	1	1	1	1	1	1	1	1	1	1	1	1	1	1	1	1	1	1	1	1	3	3	3	3	3	3	3	3	3	3	3	3	3	3	3	3	3	3	3	3	3	3	3	3	3
C6257P640	2	2	2	2	2	2	2	2	2	2	2	2	1	2	2	2	2	2	2	2	2	2	2	2	2	2	2	2	2	2	3	2	2	2	1	3	2	2	2	1	2	1	2	3	1	2	1	1	2
C5871P606	1	2	2	2	1	1	1	2	2	1	2	1	2	1	1	2	1	1	1	2	2	2	2	1	2	2	1	2	2	1	2	3	2	2	2	2	1	3	3	3	1	1	1	3	3	1	2	1	1
C7487P213	2	2	2	2	3	2	2	2	2	2	1	3	2	3	3	2	1	2	2	1	1	2	2	3	3	3	3	3	3	3	3	3	3	3	3	3	3	3	3	3	3	3	3	3	3	3	3	3	3
C5143P575	2	2	1	2	2	1	2	2	3	2	2	2	1	2	2	2	2	2	2	2	3	2	1	1	1	1	1	1	1	1	1	1	1	1	1	1	1	1	1	1	1	1	1	1	1	1	1	1	1
C5308P474	1	2	1	1	1	1	1	1	2	3	1	2	2	2	1	1	2	2	2	2	2	2	2	2	2	2	1	2	2	2	1	2	1	3	1	1	2	1	3	2	2	2	2	1	1	2	2	3	2
C2847P426	1	1	1	1	1	1	1	1	1	1	1	1	1	1	1	1	1	1	1	1	1	1	1	1	1	1	1	1	1	1	1	1	1	1	1	1	1	1	1	1	1	1	1	1	1	1	1	1	1
C7932P447	1	1	1	1	1	1	1	1	1	1	1	1	1	1	1	1	1	1	1	1	1	1	1	1	1	1	1	1	1	1	1	1	1	1	1	1	1	1	1	1	1	1	1	1	1	1	1	1	2
C2370P476	2	2	3	1	3	2	2	3	1	1	2	1	1	2	2	2	1	1	1	3	2	2	2	1	1	2	1	1	2	1	2	1	1	2	1	2	1	2	1	1	1	1	1	1	1	1	1	1	3
C1472P141	3	2	3	3	3	2	2	3	2	3	2	2	1	3	3	2	2	3	2	2	3	2	3	1	1	1	1	1	1	1	1	1	1	1	1	1	1	1	1	1	1	1	1	1	1	1	1	1	1
C399P560	3	3	3	3	3	3	3	3	3	3	3	3	3	3	3	3	3	3	3	3	3	3	3	3	2	3	3	3	3	3	2	2	3	2	2	3	3	2	2	2	3	3	3	2	2	3	3	3	2
C7759P200	1	1	1	1	1	1	1	1	1	1	1	1	1	1	1	1	1	1	1	1	1	1	1	1	1	1	1	1	1	1	1	1	1	1	1	1	1	1	1	1	1	1	1	1	1	1	1	1	1
C2745P311	3	3	3	3	3	3	3	3	3	3	3	3	3	3	3	3	3	3	3	3	3	3	3	3	3	2	1	1	3	3	3	2	1	3	1	1	2	3	3	2	1	1	1	3	2	3	3	3	1
C242P217	1	1	1	1	1	1	1	1	1	1	1	1	1	1	1	1	1	1	1	1	1	1	1	1	2	2	1	3	1	2	2	3	3	1	2	2	2	3	2	1	1	2	3	3	1	3	2	2	2
C1743P582	2	3	3	3	2	2	3	2	2	3	3	3	3	2	2	3	3	3	2	3	2	3	3	2	2	1	1	1	2	2	2	1	1	1	1	1	1	1	2	2	1	1	2	2	1	1	2	2	3
C1364P324	1	1	1	1	1	1	1	1	1	1	1	1	1	1	1	1	1	1	1	1	1	1	1	1	1	1	1	1	1	1	1	1	1	1	1	1	1	1	1	1	1	1	1	1	1	1	1	1	1
C3218P744	3	2	3	3	3	2	2	2	3	2	3	3	2	3	2	3	2	2	2	2	3	3	2	1	2	2	2	3	2	1	3	2	2	1	2	1	2	1	2	2	3	3	2	3	2	3	1	2	1
C6547P639	2	2	2	2	2	2	2	2	3	2	3	3	2	2	2	3	1	2	1	2	1	1	1	2	2	1	2	2	1	1	2	2	2	2	1	1	2	1	1	2	2	2	1	1	2	2	2	1	3
C5729P894	2	2	2	2	3	2	2	2	2	1	2	2	2	2	2	2	2	1	1	2	3	2	3	2	2	2	1	3	2	2	2	3	2	1	2	2	2	3	2	1	2	1	3	3	1	3	2	2	2
C1223P583	2	2	2	3	2	2	1	2	2	3	2	2	2	2	3	2	2	2	2	2	1	2	2	3	3	3	3	3	3	3	3	3	3	3	3	3	3	3	3	3	3	3	3	3	3	3	3	3	2
C3499P670	2	2	1	2	2	2	2	2	2	1	2	3	2	3	2	1	1	2	1	2	2	2	2	1	2	2	2	2	3	2	1	2	3	3	3	3	2	1	2	1	2	1	3	2	2	1	2	3	1
C2387P430	2	2	3	2	2	2	2	2	2	3	2	1	2	1	2	3	3	2	3	2	2	2	2	3	2	2	2	2	1	2	3	2	1	2	2	1	2	3	2	3	2	3	1	2	1	3	2	1	3
C5123P257	2	1	2	2	2	1	1	2	2	2	2	1	3	2	1	2	2	2	1	1	1	2	1	2	3	2	2	3	2	3	2	2	2	2	3	2	3	3	2	3	2	3	2	2	3	2	3	3	2
C4382P862	3	2	2	3	2	2	3	2	2	3	2	2	3	2	3	2	3	3	3	2	3	3	2	3	1	2	2	1	2	1	2	2	2	2	1	2	1	1	1	1	2	2	2	2	1	1	1	1	1
C5503P582	2	1	1	2	2	2	2	2	1	2	1	2	1	1	1	1	1	1	2	2	2	2	2	1	2	2	1	1	2	2	2	2	3	2	2	2	2	2	2	1	2	3	2	1	2	3	3	3	1
C2784P174	3	3	3	3	3	3	3	3	3	3	3	3	3	3	3	3	3	3	3	3	3	3	3	3	1	1	1	1	1	1	1	1	1	1	1	1	1	1	1	1	1	1	1	1	1	1	1	1	1
C2277P301	3	3	3	3	3	3	3	3	3	3	3	3	3	3	3	3	3	3	3	3	3	3	3	3	2	3	3	2	2	3	2	2	3	2	2	3	2	2	3	2	2	3	3	2	2	2	2	3	3
C1959P117	3	3	3	3	3	3	3	3	3	3	3	3	3	3	3	3	3	3	3	3	3	3	3	3	2	2	1	2	2	1	2	3	2	2	2	2	1	3	3	3	1	1	1	3	3	1	2	1	2
C3599P364	2	2	3	2	3	1	2	2	2	2	1	3	2	2	3	2	3	2	2	2	1	2	3	2	2	2	1	1	2	2	3	1	1	3	3	1	2	1	2	2	3	2	2	2	2	3	2	2	2
C1558P502	3	2	2	3	3	2	2	3	3	2	3	3	2	2	2	2	3	2	2	2	2	2	2	1	2	2	2	3	2	2	1	2	1	2	2	2	1	3	3	1	3	2	1	2	2	2	2	1	3
C4454P492	1	1	1	1	1	1	1	1	1	1	1	1	1	1	1	1	1	1	1	1	1	1	1	1	1	1	1	1	1	1	1	1	1	1	1	1	1	1	1	1	1	1	1	1	1	1	1	1	1
C2767P472	3	0	0	0	3	3	0	3	3	3	0	0	3	3	3	0	0	0	3	0	3	0	0	3	2	3	3	3	1	2	1	3	3	3	3	3	3	3	1	2	3	3	1	1	3	3	2	1	1
C552P383	2	1	1	1	1	2	2	2	2	2	1	2	1	2	2	2	1	1	2	2	2	2	1	2	3	3	3	3	3	3	3	3	3	3	3	3	3	3	3	3	3	3	3	3	3	3	3	3	1
C1183P1288	2	3	3	3	2	2	3	3	3	2	3	2	3	2	2	2	3	2	2	3	3	2	2	1	2	2	1	2	1	2	2	2	3	2	2	2	2	2	2	2	3	2	2	2	1	3	2	3	3
C4701P1194	3	3	3	3	3	3	3	3	3	3	3	3	3	3	3	3	3	3	3	3	3	3	3	3	2	2	2	2	2	2	1	2	3	2	2	2	2	3	2	2	3	2	3	1	2	2	2	2	1
C6410P365	1	1	1	1	1	1	1	1	1	1	1	1	1	1	1	1	1	1	1	1	1	1	1	1	1	1	1	1	1	1	1	1	1	1	1	1	1	1	1	1	1	1	1	1	1	1	1	1	3
C4494P1587	2	1	1	2	1	2	1	2	2	2	2	2	2	1	1	1	1	2	2	1	1	2	1	2	2	2	1	3	3	2	2	2	2	2	1	2	1	2	3	2	2	1	1	3	2	1	1	1	2
C355P254	1	1	1	1	1	1	1	1	1	1	1	1	1	1	1	1	1	1	1	1	1	1	1	1	1	2	1	1	1	2	1	2	1	2	2	2	1	2	2	1	1	1	2	1	2	1	2	2	1
C779P213	1	1	1	1	1	1	1	1	1	1	1	1	1	1	1	1	1	1	1	1	1	1	1	1	2	3	3	3	2	2	2	2	2	3	2	2	2	2	2	3	3	2	2	3	3	2	2	2	3
C1992P544	3	3	3	3	3	3	3	3	3	3	3	3	3	3	3	3	3	3	3	3	3	3	3	3	1	2	2	1	2	1	2	2	1	1	1	2	2	1	1	2	2	2	1	1	1	2	2	2	3
C3257P375	2	2	1	3	1	2	2	3	2	2	3	2	1	2	2	1	2	2	2	1	2	3	2	2	3	2	2	2	3	3	2	3	2	3	3	2	2	3	2	3	2	2	3	3	2	3	2	2	3
C1012P682	3	3	3	3	3	3	3	3	3	3	3	3	3	3	3	3	3	3	3	3	3	3	3	2	3	2	2	3	3	2	2	3	2	2	2	2	2	3	3	3	3	3	2	3	3	2	2	3	3
C2725P240	3	2	2	3	3	3	3	2	2	3	2	3	2	3	3	2	3	3	3	2	2	2	2	3	1	3	2	2	2	2	2	2	2	2	2	2	2	2	2	2	2	2	2	2	2	2	2	2	2
C1422P414	1	2	1	1	1	2	1	1	1	1	2	2	2	1	1	2	2	2	2	2	1	2	2	1	2	1	2	2	2	1	1	2	1	2	1	1	2	2	1	1	1	1	1	2	2	1	1	1	1
C4992P598	1	2	2	1	2	2	2	2	2	2	1	1	2	2	2	2	2	2	1	1	1	2	2	2	2	2	1	1	2	2	3	2	1	2	3	1	2	1	2	2	3	1	2	3	3	3	2	2	1
C429P421	1	1	1	1	1	1	1	1	1	1	1	1	1	1	1	1	1	1	1	1	1	1	1	1	2	2	3	3	2	2	2	2	1	2	2	2	2	2	2	3	3	1	2	3	2	1	1	1	3
C1840P532	2	2	3	1	1	3	2	2	2	2	2	2	2	2	2	2	2	1	2	3	2	3	3	1	1	2	1	1	1	1	1	1	1	2	1	1	1	1	2	2	1	1	1	2	1	1	1	1	2
C5850P446	3	3	3	3	3	3	3	3	3	3	3	3	3	3	3	3	3	3	3	3	3	3	3	3	2	2	3	2	3	2	2	3	1	2	2	2	2	2	1	2	1	2	1	2	3	2	2	1	2
C5115P177	2	1	1	1	2	2	2	2	2	2	1	2	1	2	2	2	2	2	2	2	1	1	2	2	3	3	3	3	3	3	3	3	3	3	3	3	3	3	3	3	3	3	3	3	3	3	3	3	1
C2690P122	1	1	1	1	1	1	1	1	1	1	1	1	1	1	1	1	1	1	1	1	1	1	1	1	1	1	1	1	1	1	1	1	1	1	1	1	1	1	1	1	1	1	1	1	1	1	1	1	2
C5160P798	2	3	2	2	2	3	3	2	2	2	2	3	1	2	3	2	2	2	3	3	3	2	3	2	3	2	2	3	2	3	2	2	2	2	3	2	3	3	2	3	2	3	2	2	3	2	3	3	2
C3357P311	3	3	3	3	3	3	3	3	3	3	3	3	3	3	3	3	3	3	3	3	3	3	3	3	2	2	2	2	2	2	2	2	2	2	2	2	2	2	2	2	2	2	2	2	2	2	2	2	3
C7640P532	2	2	2	2	1	2	2	2	3	3	3	2	3	1	1	2	3	2	2	3	2	2	2	3	1	1	1	1	1	1	1	1	1	1	1	1	1	1	1	1	1	1	1	1	1	1	1	1	1
C2928P660	1	1	1	1	1	1	1	1	1	1	1	1	1	1	1	1	1	1	1	1	1	1	1	1	3	2	2	3	3	2	3	3	2	2	2	2	3	3	2	2	3	2	3	3	2	3	2	3	2
C1113P213	2	2	1	2	2	3	3	2	2	3	2	1	2	2	3	1	1	2	1	2	2	1	2	2	2	3	2	2	2	3	2	2	2	2	2	2	3	2	3	2	3	2	3	2	3	2	2	3	3
C6298P99	1	1	1	1	1	1	1	1	1	1	1	1	1	1	1	1	1	1	1	1	1	1	1	1	3	3	3	3	3	3	3	3	3	3	3	3	3	3	3	3	3	3	3	3	3	3	3	3	3
C2740P167	1	1	1	1	1	1	1	1	1	1	1	1	1	1	1	1	1	1	1	1	1	1	1	1	2	2	2	2	3	3	3	3	2	1	3	3	3	3	3	2	2	2	3	2	1	2	2	2	3
C334P684	2	2	3	2	3	2	1	3	3	2	3	2	3	3	1	2	2	3	1	2	1	2	2	2	2	2	2	2	2	2	3	2	2	3	1	3	2	2	2	1	2	1	3	3	1	3	1	1	3
C4945P421	2	3	3	3	2	2	2	2	2	2	3	2	2	2	2	2	2	2	2	2	3	3	2	1	3	3	3	3	3	3	3	3	3	3	3	3	3	3	3	3	3	3	3	3	3	3	3	3	2
C2150P257	3	3	3	3	3	3	3	3	3	3	3	3	3	3	3	3	3	3	3	3	3	3	3	3	3	3	3	3	3	3	3	3	3	3	3	3	3	3	3	3	3	3	3	3	3	3	3	3	3
C2519P1592	2	1	1	2	2	2	2	2	1	1	1	2	2	1	1	1	1	1	2	2	2	2	2	1	2	2	2	2	2	1	2	1	2	3	2	2	1	1	1	2	2	2	1	2	2	2	2	2	2
C1386P467	3	3	3	3	3	3	3	3	3	3	3	3	2	3	3	3	3	3	3	3	3	3	3	1	1	1	1	1	1	1	1	1	1	1	1	1	1	1	1	1	1	1	1	1	1	1	1	1	3
C768P488	3	3	3	3	3	3	3	3	3	3	3	3	3	3	3	3	3	3	3	3	3	3	3	3	2	2	2	2	2	2	2	2	2	2	2	2	2	2	2	2	2	2	2	2	2	2	2	2	3
C2130P875	3	3	3	3	3	3	3	3	3	3	3	3	3	3	3	3	3	3	3	3	3	3	3	3	1	1	1	1	1	1	1	1	1	1	1	1	1	1	1	1	1	1	1	1	1	1	1	1	2
C294P585	3	3	3	3	3	3	3	3	3	3	3	3	3	3	3	3	3	3	3	3	3	3	3	3	3	3	3	3	3	3	3	3	3	3	3	3	3	3	3	3	3	3	3	3	3	3	3	3	3
C3197P266	1	1	1	1	1	1	1	1	1	1	1	1	1	1	1	1	1	1	1	1	1	1	1	1	1	2	2	1	2	1	2	2	1	1	1	2	2	1	1	2	2	2	1	1	1	2	2	2	1
C5686P276	3	3	3	3	3	3	3	3	3	3	3	3	3	3	3	3	3	3	3	3	3	3	3	3	2	3	2	2	2	2	2	3	3	2	2	2	2	2	2	2	3	3	3	3	3	2	2	2	2
C7929P286	2	2	2	1	3	2	2	2	2	1	2	2	2	2	1	2	2	2	2	2	3	2	2	2	3	2	2	3	3	3	2	2	2	2	2	2	2	3	3	3	3	2	2	2	3	2	3	2	2
C6321P368	2	2	1	2	2	2	2	2	2	1	2	2	2	3	2	1	1	2	1	2	2	2	2	1	3	3	3	3	3	3	3	3	3	3	3	3	3	3	3	3	3	3	3	3	3	3	3	3	3
C2899P231	3	3	3	3	3	3	3	3	3	3	3	3	3	3	3	3	3	3	3	3	3	3	3	3	2	2	2	2	2	3	2	3	2	1	2	2	3	3	3	2	2	2	3	2	2	2	2	2	2
C5918P1870	3	3	3	3	3	3	3	3	3	3	3	3	3	3	3	3	3	3	3	3	3	3	3	3	3	3	3	3	3	3	3	3	3	3	3	3	3	3	3	3	3	3	3	3	3	3	3	3	2
C1631P1171	3	3	3	3	3	3	3	3	3	3	3	3	3	3	3	3	3	3	3	3	3	3	3	3	2	2	3	2	3	2	2	1	1	2	2	2	2	1	2	3	3	2	1	1	3	2	2	2	2
C597P1515	3	3	3	3	3	3	3	3	3	3	3	3	3	3	3	3	3	3	3	3	3	3	3	3	3	3	3	3	3	3	3	3	3	3	3	3	3	3	3	3	3	3	3	3	3	3	3	3	3
C1451P485	2	2	2	2	3	2	2	2	2	2	1	3	2	3	3	2	1	2	2	1	1	2	2	3	3	2	2	3	2	3	2	2	3	3	3	2	2	3	3	3	2	2	3	3	3	2	2	2	2
C3204P172	2	1	2	1	1	1	1	1	2	1	2	1	3	2	2	2	2	2	1	1	1	1	1	2	1	2	2	2	2	2	2	2	1	1	2	2	2	2	2	2	1	1	2	1	1	2	1	1	1
C5362P808	2	3	3	3	2	2	3	2	2	3	3	3	3	2	2	3	3	3	2	3	2	3	3	2	3	2	3	3	2	3	2	2	3	3	2	2	3	2	2	2	2	3	2	2	2	2	3	3	1
C6263P122	2	3	3	3	2	2	2	2	2	2	2	2	3	2	3	2	3	3	3	3	3	3	3	3	2	3	2	2	3	3	2	2	2	2	3	3	2	3	3	2	2	2	3	3	2	2	2	3	2
C3680P425	2	2	2	1	1	1	2	3	3	1	2	2	1	2	1	1	2	3	2	3	2	2	1	3	3	2	3	3	2	2	3	2	2	3	3	3	3	2	3	2	2	3	2	3	2	2	3	2	3
C4237P626	2	2	2	3	2	1	1	2	3	3	1	2	2	2	2	2	1	2	1	1	2	2	2	2	2	1	1	1	1	1	1	2	2	2	1	2	2	2	2	2	2	2	2	1	1	1	2	2	3
C7509P239	2	1	2	2	1	1	2	2	2	1	2	1	1	2	1	2	2	1	1	2	1	1	2	2	1	1	1	1	1	1	1	1	1	1	1	1	1	1	1	1	1	1	1	1	1	1	1	1	1
C7717P236	2	2	2	2	1	1	1	1	2	2	3	2	3	2	1	1	1	2	1	2	3	2	1	2	3	3	3	3	3	3	3	3	3	3	3	3	3	3	3	3	3	3	3	3	3	3	3	3	2
C3418P323	3	3	3	3	3	3	3	3	3	3	3	3	3	3	3	3	3	3	3	3	3	3	3	3	3	1	2	2	2	2	2	2	2	2	2	2	2	2	2	2	2	2	2	2	2	2	2	2	3
C4458P511	2	2	2	2	3	2	2	2	3	2	2	3	2	3	2	2	2	1	1	2	3	2	3	2	2	2	3	1	2	2	2	1	2	3	2	2	2	1	2	3	2	3	1	1	3	1	2	2	2
C2758P323	2	1	1	2	1	2	1	2	2	1	2	2	1	1	1	1	1	2	2	1	1	2	1	1	2	2	1	3	3	2	2	2	2	2	1	2	1	2	3	2	2	2	1	3	3	1	1	1	2
C6374P336	2	2	2	2	2	2	2	2	2	2	2	2	2	2	2	2	2	2	2	2	2	2	2	2	2	2	2	2	2	2	2	2	2	2	2	2	2	2	2	2	2	2	2	2	2	2	2	2	1
C3036P593	1	1	1	1	1	1	1	1	1	1	1	1	1	1	1	1	1	1	1	1	1	1	1	1	1	2	2	1	1	2	1	1	2	2	2	2	1	1	2	2	1	2	1	1	2	1	2	1	2
C1311P642	3	3	3	3	3	3	3	3	3	3	3	3	3	3	3	3	3	3	3	3	3	3	3	3	3	3	3	3	3	3	3	3	3	3	3	3	3	3	3	3	3	3	3	3	3	3	3	3	3
C2242P802	1	1	1	1	1	1	1	1	1	0	1	1	1	1	1	1	1	1	1	1	1	1	1	0	3	3	3	3	3	3	3	3	3	3	3	3	3	3	3	3	3	3	3	3	3	3	3	3	2
C2964P798	2	3	3	3	2	2	2	2	2	2	3	2	3	2	2	2	2	2	2	2	3	3	2	2	3	3	3	3	3	3	3	3	3	3	3	3	3	3	3	3	3	3	3	3	3	3	3	3	3
C1358P424	2	2	2	1	2	3	3	1	1	3	3	1	1	2	2	2	2	3	2	1	2	3	1	2	1	1	1	1	1	1	1	1	1	1	1	1	1	1	1	1	1	1	1	1	1	1	1	1	1
C2979P107	3	3	3	3	3	3	3	3	3	3	3	3	3	3	3	3	3	3	3	3	3	3	3	3	3	2	2	3	2	2	3	2	3	3	2	3	2	2	3	2	2	3	2	3	2	2	2	3	2
C3005P261	3	2	3	3	3	2	2	2	3	3	3	3	2	3	2	3	2	2	2	2	3	2	2	2	3	2	3	3	3	2	3	2	3	2	2	2	3	3	2	3	3	2	2	3	2	3	2	2	2
C3630P471	1	1	1	1	1	1	0	1	1	1	1	1	1	1	1	1	1	1	1	1	0	1	1	3	1	2	2	1	1	2	2	1	2	2	2	2	2	1	1	1	1	1	2	1	1	2	2	1	1
C4385P260	2	2	2	3	2	2	1	2	3	3	3	2	2	1	3	2	2	2	2	1	1	2	2	2	2	1	2	2	2	1	1	1	2	1	1	1	2	2	1	1	2	2	1	1	2	2	1	2	2
C3294P1249	2	2	3	1	3	2	2	3	1	1	2	1	1	2	2	2	1	1	1	3	2	2	2	1	1	2	1	1	2	1	2	1	1	2	1	2	1	2	1	1	1	1	1	1	2	1	1	1	2
C3351P718	1	1	1	1	1	1	1	1	1	1	1	1	1	1	1	1	1	1	1	1	1	1	1	1	2	2	2	1	2	3	1	2	2	3	3	3	2	2	2	2	1	2	2	2	2	1	2	2	1
C513P580	1	2	1	2	1	2	2	1	2	2	1	2	2	1	2	1	1	1	2	2	2	1	1	1	1	2	1	1	2	2	2	2	3	1	1	3	1	3	1	2	3	1	3	1	1	1	1	2	1
C7337P597	2	1	2	1	1	1	1	1	2	1	2	1	3	2	2	2	2	2	1	1	1	1	1	2	3	3	3	3	3	3	3	3	3	3	3	3	3	3	3	3	3	3	3	3	3	3	3	3	1
C5999P680	1	1	1	1	1	1	1	1	1	1	1	1	1	1	1	1	1	1	1	1	1	1	1	1	3	3	3	3	3	3	3	3	3	3	3	3	3	3	3	3	3	3	3	3	3	3	3	3	3
C1726P338	3	3	3	3	3	3	3	3	3	3	3	3	3	3	3	3	3	3	3	3	3	3	3	3	2	3	3	2	3	3	3	3	3	3	3	3	2	2	2	2	2	2	2	2	2	3	3	2	3
C5004P71	2	2	2	2	3	2	2	2	3	2	2	3	2	3	2	2	2	1	1	1	2	2	3	1	2	2	3	1	2	2	2	1	2	3	2	2	2	1	2	3	2	3	1	1	3	1	2	2	1
C3394P1632	3	2	3	3	3	2	3	3	2	2	2	2	2	2	2	3	2	2	2	2	3	2	2	1	3	3	3	3	3	3	3	3	3	3	3	3	3	3	3	3	3	3	3	3	3	3	3	3	2
C2430P256	1	1	1	1	1	1	1	1	1	1	1	1	1	1	1	1	1	1	1	1	1	1	1	1	1	1	1	1	1	1	1	1	1	1	1	1	1	1	1	1	1	1	1	1	1	1	1	1	1
C3472P645	1	1	1	1	1	1	1	1	1	1	1	1	2	1	1	1	1	1	1	1	1	1	1	3	1	1	1	1	1	1	1	1	1	1	1	1	1	1	1	1	1	1	1	1	1	1	1	1	1
C5486P2392	3	3	3	3	3	3	3	3	3	3	3	3	3	3	3	3	3	3	3	3	3	3	3	3	2	3	2	2	3	3	3	3	2	2	3	2	3	3	3	2	2	3	2	3	2	3	3	3	1
C2207P324	2	2	2	2	3	2	2	2	2	2	1	2	1	3	2	2	1	1	3	1	3	1	2	2	3	3	3	3	3	3	3	3	3	3	3	3	3	3	3	3	3	3	3	3	3	3	3	3	3
C1003P170	1	1	1	1	1	1	1	1	1	1	1	1	1	1	1	1	1	1	1	1	1	1	1	1	3	3	3	3	3	3	3	3	3	3	3	3	3	3	3	3	3	3	3	3	3	3	3	3	3
C1818P434	2	2	2	2	2	2	2	2	3	2	3	3	2	2	2	3	1	2	1	2	1	2	1	1	2	2	3	2	1	2	2	3	3	3	2	2	0	1	2	2	2	3	2	2	0	0	2	1	0
C1661P113	1	1	1	1	1	1	1	1	1	1	1	1	1	1	1	1	1	1	1	1	1	1	1	1	2	1	2	2	2	2	2	1	1	2	2	2	2	2	2	2	1	1	1	1	1	2	2	2	2
C3384P593	3	3	3	3	3	3	3	3	3	3	3	3	3	3	3	3	3	3	3	3	3	3	3	3	2	3	2	2	2	3	3	2	3	2	3	3	2	2	3	3	3	3	3	2	2	3	3	3	3
C2002P197	2	2	2	1	2	1	1	1	1	2	3	3	2	3	2	2	1	1	1	2	3	2	2	3	1	2	2	2	2	2	1	2	1	1	2	2	1	2	1	2	2	2	1	2	1	2	2	1	2
C1318P180	2	2	2	2	1	3	3	2	2	1	2	2	1	2	2	2	2	2	2	3	3	2	1	2	1	1	1	1	1	1	1	1	1	1	1	1	1	1	1	1	1	1	1	1	1	1	1	1	1
C453P238	2	1	1	1	2	2	2	2	2	2	1	2	1	2	2	2	2	2	2	2	1	1	2	2	1	1	1	1	1	1	1	1	1	1	1	1	1	1	1	1	1	1	1	1	1	1	1	1	2
C1654P1024	2	2	1	3	1	2	2	1	3	3	2	3	3	2	2	2	3	3	2	1	2	2	2	3	3	2	3	2	2	3	2	3	3	3	3	2	3	2	3	3	3	3	3	3	2	3	3	3	3
C2109P451	2	3	3	3	3	2	3	2	3	1	2	3	2	3	2	3	2	2	2	2	3	3	3	2	3	3	3	3	3	3	3	3	3	3	3	3	3	3	3	3	3	3	3	3	3	3	3	3	2
C1864P843	2	1	1	1	1	1	1	2	2	1	2	2	1	1	1	1	1	2	1	2	2	2	1	2	2	2	3	2	2	2	1	2	3	2	2	2	3	3	2	1	3	2	3	1	2	2	2	2	1
C3826P399	2	3	3	3	2	2	3	2	2	3	3	3	3	2	2	3	3	3	2	3	2	3	3	2	3	3	3	3	3	3	3	3	3	3	3	3	3	3	3	3	3	3	3	3	3	3	3	3	1
C4363P321	2	2	2	1	2	3	3	2	2	3	3	2	1	3	2	3	1	1	1	2	1	1	1	1	2	1	2	2	1	1	2	2	2	2	1	1	2	1	1	2	2	2	1	1	2	2	2	1	1
C1081P644	1	1	1	1	1	1	1	1	1	1	1	1	1	1	1	1	1	1	1	1	1	1	1	1	1	1	1	1	1	1	1	1	1	1	1	1	1	1	1	1	1	1	1	1	1	1	1	1	1
C3090P349	2	3	3	3	2	2	3	2	2	1	3	3	2	2	2	3	3	3	2	3	2	3	3	1	1	1	1	1	1	1	1	1	1	1	1	1	1	1	1	1	1	1	1	1	1	1	1	1	3
C1541P458	1	1	1	1	1	1	1	1	1	1	1	1	1	1	1	1	1	1	1	1	1	1	1	1	1	1	1	1	1	1	1	1	1	1	1	1	1	1	1	1	1	1	1	1	1	1	1	1	2
C1600P723	2	3	2	2	2	2	2	3	3	2	3	3	2	2	2	2	2	3	2	3	3	3	2	2	2	3	2	2	3	3	3	3	2	2	2	2	2	2	2	3	2	2	2	3	3	3	2	3	2
C6992P454	2	3	3	3	2	2	2	2	2	2	3	2	2	2	2	2	2	2	2	2	3	3	2	1	1	1	1	1	1	1	1	1	1	1	1	1	1	1	1	1	1	1	1	1	1	1	1	1	2
C5681P353	2	2	2	2	1	1	2	2	2	3	3	2	3	2	2	2	3	3	1	3	1	3	3	2	3	3	3	3	3	3	3	3	3	3	3	3	3	3	3	3	3	3	3	3	3	3	3	3	1
C3237P625	2	2	2	3	2	3	2	1	2	3	2	2	3	2	3	3	2	1	2	2	2	1	2	1	3	3	3	3	3	3	3	3	3	3	3	3	3	3	3	3	3	3	3	3	3	3	3	3	2
C1633P229	3	3	3	3	3	3	3	3	3	3	3	3	3	3	3	3	3	3	3	3	3	3	3	3	2	2	3	3	2	2	1	2	3	2	1	3	2	3	2	2	1	3	2	1	1	1	2	2	3
C3324P692	2	2	2	3	2	1	1	3	3	1	1	3	2	2	2	2	2	2	2	3	2	1	3	2	2	2	2	2	1	2	1	1	1	1	1	1	3	3	3	3	2	2	3	3	3	1	2	2	1
C3525P284	3	3	3	3	3	3	3	3	3	3	3	3	3	3	3	3	3	3	3	3	3	3	3	3	3	3	3	3	3	3	3	3	3	3	3	3	3	3	3	3	3	3	3	3	3	3	3	3	3
C2141P380	1	1	1	1	1	1	1	1	1	1	1	1	1	1	1	1	1	1	1	1	1	1	1	1	1	2	2	1	1	2	2	1	1	2	2	1	2	1	1	1	2	2	2	1	1	2	1	2	1
C491P811	3	3	3	3	3	3	3	3	3	3	3	3	3	3	3	3	3	3	3	3	3	3	3	3	2	2	2	1	3	2	1	1	2	1	2	2	3	2	1	2	2	2	2	2	2	3	3	1	1
C1382P326	1	1	1	1	1	1	1	1	1	1	1	1	1	1	1	1	1	1	1	1	1	1	1	1	1	2	2	1	1	2	2	1	2	2	2	2	2	1	1	1	1	1	2	1	1	2	2	1	1
C7320P334	3	3	3	3	3	3	3	3	3	3	3	3	3	3	3	3	3	3	3	3	3	3	3	3	2	1	1	2	2	1	2	2	1	2	2	1	2	2	1	2	2	1	1	2	2	2	2	1	3
C7146P595	1	2	1	2	2	2	1	2	2	3	2	2	2	1	2	2	2	2	2	1	1	1	1	1	3	3	3	3	3	3	3	3	3	3	3	3	3	3	3	3	3	3	3	3	3	3	3	3	3
C4663P1673	2	2	1	2	1	2	2	3	3	2	2	2	2	2	2	2	2	1	2	3	3	3	2	2	3	2	2	3	3	2	3	2	2	2	3	3	3	3	3	3	2	2	2	3	3	2	2	2	1
C2937P134	2	2	1	2	1	2	3	1	1	2	1	2	1	1	3	2	2	1	3	2	3	2	2	2	3	3	3	3	3	3	3	3	3	3	3	3	3	3	3	3	3	3	3	3	3	3	3	3	2
C1727P724	2	2	3	2	2	1	2	3	2	3	2	2	3	3	2	1	2	2	2	2	2	1	2	2	3	3	3	3	3	3	3	3	3	3	3	3	3	3	3	3	3	3	3	3	3	3	3	3	3
[truncated: 95 more columns]

## Sheet: F7-F12
family	F7	F7	F7	F7	F7	F7	F7	F7	F7	F7	F7	F7	F7	F7	F7	F7	F7	F7	F7	F7	F7	F7	F7	F7	F8	F8	F8	F8	F8	F8	F8	F8	F8	F8	F8	F8	F8	F8	F8	F8	F8	F8	F8	F8	F8	F8	F8	F8	F9
role_in_family	1	2	3	3	3	3	3	3	3	3	3	3	3	3	3	3	3	3	3	3	3	3	3	3	1	2	3	3	3	3	3	3	3	3	3	3	3	3	3	3	3	3	3	3	3	3	3	3	1
ind_number	145	149	146	147	148	150	151	152	153	154	155	156	157	158	159	160	161	162	163	164	165	166	167	168	169	173	170	171	172	174	175	176	177	178	179	180	181	182	183	184	185	186	187	188	189	190	191	192	193
sex	0	1	0	0	0	1	1	1	0	0	0	0	1	1	1	1	0	0	0	0	1	1	1	0	0	1	0	0	0	1	1	1	0	0	0	0	1	1	1	1	0	0	0	0	1	1	1	1	0
C5501P516	3	3	3	3	3	3	3	3	3	3	3	3	3	3	3	3	3	3	3	3	3	3	3	3	3	3	3	3	3	3	3	3	3	3	3	3	3	3	3	3	3	3	3	3	3	3	3	3	3
G10P404	3	3	3	3	3	3	3	3	3	3	3	3	3	3	3	3	3	3	3	3	3	3	3	3	3	2	1	1	3	2	2	2	1	3	3	3	3	2	3	2	1	3	3	3	2	3	2	2	2
C5066P218	2	2	2	2	2	2	2	3	1	3	1	2	3	3	2	3	1	2	2	2	2	2	1	3	2	2	1	1	2	2	3	2	3	2	2	2	2	1	3	2	3	3	2	2	1	2	1	2	3
C681P201	1	1	1	1	1	1	1	1	1	1	1	1	1	1	1	1	1	1	1	1	1	1	1	1	2	2	2	2	3	2	1	2	3	2	2	2	1	2	3	2	3	2	3	2	2	2	2	2	3
C960P287	2	2	2	1	2	2	2	1	1	3	2	1	1	1	2	2	1	2	2	2	3	2	3	3	2	2	2	2	2	2	3	2	2	3	2	3	3	2	2	2	1	2	1	2	2	2	1	3	2
G6P127	3	2	2	3	3	2	2	2	3	3	2	2	3	2	2	2	2	2	3	3	2	3	2	2	2	2	2	3	2	2	2	1	2	1	1	1	2	2	2	3	1	1	1	2	2	2	1	1	2
C2480P978	1	1	1	0	1	1	1	1	1	1	0	1	1	0	0	1	1	0	0	1	1	1	1	1	1	1	1	1	1	1	1	1	1	1	1	1	1	1	1	1	1	1	1	1	1	1	1	1	1
C2598P375	2	2	2	3	2	2	3	1	2	3	3	1	3	3	2	2	2	2	1	2	2	3	2	2	3	3	3	3	3	3	3	3	3	3	3	3	3	3	3	3	3	3	3	3	3	3	3	3	2
C4266P307	2	2	1	2	3	2	1	1	2	3	3	2	2	2	3	1	2	2	1	1	1	1	3	1	2	2	1	2	3	2	2	1	2	3	2	3	2	3	1	2	3	1	3	2	3	3	2	1	3
C2669P435	3	2	2	3	2	2	2	2	3	3	2	3	2	2	3	2	2	2	3	2	3	2	2	2	2	2	2	2	1	3	2	1	2	3	1	3	3	2	2	1	3	2	1	2	2	2	1	2	2
C3282P289	3	3	3	3	3	3	3	3	3	3	3	3	3	3	3	3	3	3	3	3	3	3	3	3	2	2	2	3	3	3	2	1	2	1	3	2	3	2	1	2	2	2	2	2	2	2	2	2	2
C6246P682	3	3	3	3	3	3	3	3	3	3	3	3	3	3	3	3	3	3	3	3	3	3	3	3	3	3	3	3	3	3	3	3	3	3	3	3	3	3	3	3	3	3	3	3	3	3	3	3	3
C6976P456	2	2	1	1	2	1	3	2	1	1	1	2	3	2	1	2	1	2	2	2	2	2	1	1	3	3	3	3	3	3	3	3	3	3	3	3	3	3	3	3	3	3	3	3	3	3	3	3	3
C6322P350	3	1	2	2	2	2	2	2	2	2	2	2	2	2	2	2	2	2	2	2	2	2	2	2	2	2	1	2	2	2	1	2	1	1	3	2	2	3	1	1	3	2	1	1	2	2	3	3	3
C1393P256	2	2	2	2	3	2	3	2	2	3	3	2	3	2	2	2	2	2	2	1	3	2	2	1	3	3	3	3	3	3	3	3	3	3	3	3	3	3	3	3	3	3	3	3	3	3	3	3	2
C4436P218	3	3	3	3	3	3	3	3	3	3	3	3	3	3	3	3	3	3	3	3	3	3	3	3	3	3	3	3	3	3	3	3	0	3	3	3	3	3	3	0	3	3	0	0	3	3	3	3	3
C5875P602	3	3	3	3	3	3	3	3	3	3	3	3	3	3	3	3	3	3	3	3	3	3	3	3	3	3	3	3	3	3	3	3	3	3	3	3	3	3	3	3	3	3	3	3	3	3	3	3	2
G7P315	2	2	1	1	2	3	3	2	2	2	2	2	2	2	3	2	3	2	2	2	3	1	2	2	2	2	1	3	1	2	3	3	2	2	1	2	2	3	2	2	2	2	3	2	2	2	1	2	3
C5259P671	1	1	1	1	1	1	1	1	1	1	1	1	1	1	1	1	1	1	1	1	1	1	1	1	1	1	1	1	1	1	1	1	1	1	1	1	1	1	1	1	1	1	1	1	1	1	1	1	1
C3244P861	2	3	2	2	3	3	3	2	2	2	3	2	2	3	3	2	3	3	2	2	2	2	2	3	3	3	3	3	3	3	3	3	3	3	3	3	3	3	3	3	3	3	3	3	3	3	3	3	3
C5586P392	3	3	3	3	3	3	3	3	3	3	3	3	3	3	3	3	3	3	3	3	3	3	3	3	3	3	3	3	3	3	3	3	3	3	3	3	3	3	3	3	3	3	3	3	3	3	3	3	2
C2588P517	3	2	2	3	3	2	2	2	3	3	2	2	3	2	3	2	2	2	3	3	2	3	2	2	2	2	2	1	2	2	2	3	2	3	3	2	2	2	2	1	3	3	3	1	2	1	3	3	3
G21P231	3	2	3	2	3	2	2	3	2	3	2	3	3	3	2	3	0	3	2	3	2	2	2	3	3	3	3	3	3	3	3	3	3	3	3	3	3	3	3	3	3	3	3	3	3	3	3	3	3
C3958P146	2	2	3	2	1	3	1	2	2	1	3	2	1	3	3	3	2	1	1	2	1	2	2	2	3	3	3	3	3	3	3	3	3	3	3	3	3	3	3	3	3	3	3	3	3	3	3	3	3
C6778P338	2	1	2	2	1	1	1	2	2	2	1	2	2	1	1	2	1	1	2	2	2	2	2	1	3	3	3	3	3	3	3	3	3	3	3	3	3	3	3	3	3	3	3	3	3	3	3	3	3
C7605P296	3	3	3	3	3	3	3	3	3	3	3	3	3	3	3	3	3	3	3	3	3	3	3	3	3	2	2	2	3	2	2	2	3	3	2	2	3	2	3	3	0	3	2	2	3	2	2	2	2
C6245P97	3	2	2	2	3	2	3	2	2	3	3	2	3	3	3	3	2	3	2	2	2	3	3	0	1	2	2	2	2	2	2	2	2	1	1	1	2	2	1	2	2	2	2	1	1	2	2	1	2
C2337P828	3	3	3	3	3	3	3	3	3	3	3	3	3	3	3	3	3	3	3	3	3	3	3	3	2	2	2	2	1	3	1	2	3	3	2	2	2	2	1	3	3	2	1	1	3	2	3	2	2
C7736P814	3	2	2	3	3	3	2	2	3	3	3	2	2	2	3	2	2	2	2	3	2	2	3	2	1	1	1	1	1	1	1	1	1	1	1	1	1	1	1	1	1	1	1	1	1	1	1	1	2
C4108P507	2	1	2	1	2	1	1	1	2	1	2	2	1	1	1	1	2	2	1	2	1	1	2	1	2	2	2	1	1	2	3	3	3	2	2	2	3	1	3	2	3	3	3	3	2	2	1	3	1
C1576P882	3	2	2	2	3	2	3	2	2	3	2	2	3	2	2	2	2	3	3	3	3	2	3	3	2	2	2	2	2	3	2	2	2	2	2	2	2	1	2	2	2	2	1	3	2	2	3	1	2
C7148P593	1	1	1	1	1	1	1	1	1	1	1	1	1	1	1	1	1	1	1	1	1	1	1	1	1	1	1	1	1	1	1	1	1	1	1	1	1	1	1	1	1	1	1	1	1	1	1	1	1
C6961P563	3	3	3	3	3	3	3	3	3	3	3	3	3	3	3	3	3	3	3	3	3	3	3	3	3	3	3	3	3	3	3	3	3	3	3	3	3	3	3	3	3	3	3	3	3	3	3	3	3
C3505P1918	2	1	1	2	3	1	2	1	2	2	2	3	3	3	3	1	1	1	1	2	1	1	2	1	1	1	1	1	1	1	1	1	0	0	1	1	0	1	1	1	1	1	1	1	1	1	1	1	2
G20P773	2	2	2	3	2	2	1	3	2	2	2	2	2	3	3	2	2	3	3	1	1	2	2	1	2	3	3	2	3	3	3	3	2	2	2	2	2	2	2	3	3	3	2	2	2	3	3	2	2
C2311P171	1	3	2	2	2	2	2	2	2	2	2	2	2	2	2	2	2	2	2	2	2	2	2	2	1	1	1	1	1	1	1	1	1	1	1	1	1	1	1	1	1	1	1	1	1	1	1	1	2
C4154P1060	3	2	3	2	2	3	3	3	2	3	3	2	3	2	3	3	3	2	2	3	2	3	2	3	3	3	3	0	0	3	0	3	3	3	3	3	3	3	0	3	3	3	0	0	3	3	3	3	2
C5034P456	3	3	3	3	3	3	3	3	3	3	3	3	3	3	3	3	3	3	3	3	3	3	3	3	3	3	0	3	3	3	3	3	3	3	3	3	3	3	3	3	3	3	3	3	3	3	3	3	3
C7433P337	3	3	3	3	3	3	3	3	3	3	3	3	3	3	3	3	3	3	3	3	3	3	3	3	3	3	3	3	3	3	3	3	3	3	3	3	3	3	3	3	3	3	3	3	3	3	3	3	3
C259P90	2	1	2	1	2	1	1	1	2	1	2	2	1	1	1	1	2	2	1	2	1	1	2	1	2	2	3	3	2	3	1	2	1	2	2	2	2	3	1	2	1	1	2	2	3	2	3	2	2
C6378P534	3	3	3	3	3	3	3	3	3	3	3	3	3	3	3	3	3	3	3	3	3	3	3	3	3	3	3	3	3	3	3	3	3	3	3	3	3	3	3	3	3	3	3	3	3	3	3	3	3
C6470P474	2	2	2	1	3	2	2	2	3	3	3	2	2	3	3	3	1	3	3	2	1	3	2	1	1	2	2	2	2	2	2	2	2	1	1	1	2	2	1	2	2	2	2	1	2	2	2	1	3
C5011P541	1	1	1	1	1	1	1	1	1	1	1	1	1	1	1	1	1	1	1	1	1	1	1	1	3	3	3	3	3	3	3	3	3	3	3	3	3	3	3	3	3	3	3	3	3	3	3	3	3
C5067P558	3	3	3	3	3	3	3	3	3	3	3	3	3	3	3	3	3	3	3	3	3	3	3	3	1	1	1	1	1	1	1	1	1	1	1	1	1	1	1	1	1	1	1	1	1	1	1	1	2
C7963P240	2	3	3	2	3	3	3	2	2	3	2	3	3	3	3	3	3	3	3	3	3	2	3	2	2	3	3	2	2	3	2	2	3	3	2	3	3	2	3	2	3	3	2	2	2	2	2	3	3
G20P118	1	1	1	0	1	1	1	0	1	1	1	1	1	0	0	1	1	0	0	1	1	1	1	1	3	3	3	3	3	3	3	3	3	3	3	3	3	3	3	3	3	3	3	3	3	3	3	3	2
C5010P530	2	3	2	3	2	2	2	3	3	2	3	2	2	2	2	2	2	2	2	2	2	3	2	3	2	2	2	3	3	1	3	3	2	2	3	1	2	3	2	2	1	2	3	2	2	3	2	2	1
C2403P977	3	3	3	3	3	3	3	3	3	3	3	3	3	3	3	3	3	3	3	3	3	3	3	3	3	3	3	3	3	3	3	3	3	3	3	3	3	3	3	3	3	3	3	3	3	3	3	3	2
C4269P217	1	1	1	1	1	1	1	1	1	1	1	1	1	1	1	1	1	1	1	1	1	1	1	1	2	1	2	1	1	2	1	1	2	2	1	2	2	1	2	1	2	2	1	1	1	1	1	2	2
G25P134	3	3	3	3	3	3	3	3	3	3	3	3	3	3	3	3	3	3	3	3	3	3	3	3	3	3	3	3	3	3	3	3	3	3	3	3	3	3	3	3	3	3	3	3	3	3	3	3	3
C4014P649	1	1	1	1	1	1	1	1	1	1	1	1	1	1	1	1	1	1	1	1	1	1	1	1	1	1	1	1	1	1	1	1	1	1	1	1	1	1	1	1	1	1	1	1	1	1	1	1	1
C493P465	2	2	2	2	1	2	3	3	2	1	1	2	2	2	1	3	2	2	3	3	3	3	1	3	2	3	3	3	1	3	2	3	2	1	2	1	2	1	3	2	1	3	1	2	1	1	3	3	0
G3P433	3	3	3	3	3	3	3	3	3	3	3	3	3	3	3	3	3	3	3	3	3	3	3	3	3	3	3	3	3	3	3	3	3	3	3	3	3	3	3	3	3	3	3	3	3	3	3	3	2
C5215P416	1	1	1	1	1	1	1	1	1	1	1	1	1	1	1	1	1	1	1	1	1	1	1	1	1	1	1	1	1	1	1	1	1	1	1	1	1	1	1	1	1	1	1	1	1	1	1	1	1
C1071P1009	3	3	3	3	3	3	3	3	3	3	3	3	3	3	3	3	3	3	3	3	3	3	3	3	3	3	3	3	3	3	3	3	3	3	3	3	3	3	3	3	3	3	3	3	3	3	3	3	3
C6383P317	2	2	2	2	3	1	1	2	3	2	2	2	2	3	1	2	2	1	2	1	2	2	2	2	3	3	3	3	3	3	3	3	3	3	3	3	3	3	3	3	3	3	3	3	3	3	3	3	1
C697P580	3	3	3	3	3	3	3	3	3	3	3	3	3	3	3	3	3	3	3	3	3	3	3	3	3	3	3	3	3	3	3	3	3	3	3	3	3	3	3	3	3	3	3	3	3	3	3	3	3
C2483P1107	1	1	1	1	1	1	1	1	1	1	1	1	1	1	1	1	1	1	1	1	1	1	1	1	1	1	1	1	1	1	1	1	1	1	1	1	1	1	1	1	1	1	1	1	1	1	1	1	2
C3560P974	3	3	3	3	3	3	3	3	3	3	3	3	3	3	3	3	3	3	3	3	3	3	3	3	3	3	3	3	3	3	3	3	3	3	3	3	3	3	3	3	3	3	3	3	3	3	3	3	3
G19P749	3	3	3	0	3	3	3	0	3	3	3	3	3	0	0	3	3	0	0	3	3	3	3	3	2	2	1	2	1	1	1	1	2	3	3	3	3	3	3	1	1	2	3	2	3	1	2	2	2
C8108P318	3	2	3	3	2	3	2	3	3	2	3	3	2	2	2	2	3	2	3	3	2	3	3	2	2	2	3	2	2	2	2	2	2	2	3	2	2	1	3	2	2	2	2	2	2	2	2	1	3
C6044P553	3	3	3	3	3	3	3	3	3	3	3	3	3	3	3	3	3	3	3	3	3	3	3	3	3	3	3	3	3	3	3	3	3	3	3	3	3	3	3	3	3	3	3	3	3	3	3	3	3
C5106P480	3	3	3	3	3	3	3	3	3	3	3	3	3	3	3	3	3	3	3	3	3	3	3	3	2	2	1	2	2	2	1	1	2	3	3	3	2	2	3	2	1	2	3	3	2	1	1	1	2
C4302P1067	2	2	1	2	2	2	1	3	2	1	3	1	2	2	1	2	2	2	1	2	1	3	2	3	2	1	1	2	2	1	2	2	1	1	2	1	1	2	1	2	1	1	2	2	2	2	2	1	1
C995P671	1	1	1	1	1	1	1	1	1	1	1	1	1	1	1	1	1	1	1	1	1	1	1	1	1	1	1	1	1	1	1	1	1	1	1	1	1	1	1	1	1	1	1	1	1	1	1	1	1
C3359P304	3	3	3	3	3	3	3	3	3	3	3	3	3	3	3	3	3	3	3	3	3	3	3	3	2	3	3	2	2	3	2	3	2	3	3	3	3	3	2	2	3	3	3	2	3	3	2	3	3
C1214P461	2	1	2	1	1	2	1	1	1	1	2	1	1	2	2	2	1	1	1	2	1	1	2	2	2	2	2	2	2	3	2	2	2	2	2	2	2	1	2	2	2	2	1	3	2	2	3	2	2
C6466P276	2	2	2	2	3	1	2	1	3	1	2	2	2	2	2	1	1	2	1	1	1	2	1	2	2	3	3	3	3	2	2	3	2	2	2	3	2	2	2	3	3	2	2	2	3	2	2	2	2
C4927P108	2	2	2	2	2	2	2	3	1	3	1	2	3	3	2	3	1	2	2	2	2	2	1	3	3	3	3	3	3	3	3	3	3	3	3	3	3	3	3	3	3	3	3	3	3	3	3	3	3
C1975P770	2	2	2	2	1	2	3	3	2	1	1	2	2	2	1	3	2	2	3	3	3	3	1	3	2	2	3	2	1	2	2	3	2	1	2	1	2	1	3	2	1	3	1	2	1	1	3	3	2
C4315P371	3	3	0	0	3	3	3	3	3	0	3	3	0	0	0	3	3	3	3	3	0	0	0	3	1	1	1	1	1	1	1	1	1	1	1	1	1	1	1	1	1	1	1	1	1	1	1	1	2
C4460P231	1	1	1	1	1	1	1	1	1	1	1	1	1	1	1	1	1	1	1	1	1	1	1	1	1	1	1	1	1	1	1	1	1	1	1	1	1	1	1	1	1	1	1	1	1	1	1	1	1
C2605P380	2	2	1	2	3	2	1	1	2	3	3	2	2	2	3	1	2	2	1	1	1	1	3	1	1	2	1	2	2	2	1	1	1	2	1	2	1	2	1	1	2	1	2	1	2	2	2	1	3
C2691P265	2	1	1	2	2	1	2	2	2	2	2	2	2	2	1	2	1	2	1	2	2	2	1	1	2	2	1	2	3	2	1	1	2	3	3	3	2	3	3	2	1	2	3	3	2	2	1	1	2
C4824P1045	1	2	2	2	1	1	1	1	1	1	1	2	2	2	1	1	2	1	2	1	1	1	2	1	2	1	2	2	2	1	2	2	1	1	1	1	2	1	2	1	1	1	2	2	1	2	1	1	2
G22P88	1	1	1	1	1	1	1	1	1	1	1	1	1	1	1	1	1	1	1	1	1	1	1	1	1	1	1	1	1	1	1	1	1	1	1	1	1	1	1	1	1	1	1	1	1	1	1	1	1
C1425P629	2	3	2	3	3	2	2	2	2	2	2	3	2	3	2	2	2	3	2	3	2	2	3	3	1	2	2	2	1	1	2	2	2	2	3	1	1	3	3	1	3	3	3	1	3	1	3	3	2
C8135P293	2	2	2	2	2	2	2	2	2	2	2	2	2	2	2	2	2	2	2	2	2	2	2	2	2	2	2	2	2	2	2	2	2	2	2	2	2	2	2	2	2	2	2	2	2	2	2	2	2
C3046P1618	3	3	3	3	3	3	3	3	3	3	3	3	3	3	3	3	3	3	3	3	3	3	3	3	1	1	1	1	1	1	1	1	1	1	1	1	1	1	1	1	1	1	1	1	1	1	1	1	1
C5516P391	1	1	1	1	1	1	1	1	1	1	1	1	1	1	1	1	1	1	1	1	1	1	1	1	1	1	1	1	1	1	1	1	1	1	1	1	1	1	1	1	1	1	1	1	1	1	1	1	2
C7031P1283	3	3	3	3	3	3	3	3	3	3	3	3	3	3	3	3	3	3	3	3	3	3	3	3	3	3	3	3	3	3	3	3	3	3	3	3	3	3	3	3	3	3	3	3	3	3	3	3	3
C2832P641	2	3	2	2	3	2	2	3	2	2	2	3	2	2	2	2	2	2	3	3	2	2	2	2	3	3	3	3	3	3	3	3	3	3	3	3	3	3	3	3	3	3	3	3	3	3	3	3	3
C1920P110	3	3	3	3	3	3	3	3	3	3	3	3	3	3	3	3	3	3	3	3	3	3	3	3	3	3	3	3	3	3	3	3	3	3	3	3	3	3	3	3	3	3	3	3	3	3	3	3	3
C8118P736	2	1	1	1	1	2	2	2	2	1	1	2	2	2	1	2	2	1	2	1	2	1	2	1	1	1	1	1	1	1	1	1	1	1	1	1	1	1	1	1	1	1	1	1	1	1	1	1	1
C6152P344	2	3	2	3	3	2	3	3	3	3	2	3	3	2	2	2	3	3	3	2	3	3	2	2	2	2	1	2	2	1	2	2	2	2	2	2	2	3	1	2	2	2	3	1	2	2	1	3	2
C3895P862	1	2	1	3	2	1	3	3	2	2	2	1	1	2	1	2	1	2	2	1	1	2	3	1	1	2	2	3	3	1	3	1	1	2	1	1	3	1	1	3	0	3	3	1	2	2	2	1	3
C2850P210	3	3	3	3	3	3	3	3	3	3	3	3	3	3	3	3	3	3	3	3	3	3	3	3	3	3	3	3	3	3	3	3	3	3	3	3	3	3	3	3	3	3	3	3	3	3	3	3	2
C1528P893	1	2	2	2	2	1	1	2	2	1	2	2	1	1	2	1	2	2	2	1	2	2	1	1	1	2	2	2	2	1	1	1	1	1	2	1	2	2	1	1	1	1	1	2	1	1	2	2	1
C7446P232	1	2	2	1	2	2	1	2	1	2	1	1	1	1	2	2	2	1	1	1	2	1	2	1	2	2	2	3	3	2	2	2	2	1	1	1	2	1	2	2	1	1	1	2	2	2	1	0	1
C6023P1088	2	1	1	1	2	2	2	1	2	1	1	1	1	2	2	2	2	2	2	2	2	1	2	1	1	1	1	1	1	1	1	1	1	1	1	1	1	1	1	1	1	1	1	1	1	1	1	1	1
C3734P358	1	1	1	1	1	1	1	1	1	1	1	1	1	1	1	1	1	1	1	1	1	1	1	1	2	1	2	2	2	2	2	2	2	2	1	2	2	1	1	1	1	1	1	1	1	2	1	1	2
C7263P405	3	2	3	3	2	2	3	3	3	3	2	2	2	3	2	2	2	2	3	3	2	2	2	3	2	3	2	3	2	2	3	3	3	3	3	2	3	2	2	2	0	2	2	2	3	2	3	3	3
C2056P834	3	3	3	3	3	3	3	3	3	3	3	3	3	3	3	3	3	3	3	3	3	3	3	3	3	3	3	3	3	3	3	3	3	3	3	3	3	3	3	3	3	3	3	3	3	3	3	3	3
G16P168	3	2	3	3	2	3	3	3	3	3	2	2	2	3	2	1	1	1	3	3	1	1	2	3	2	2	2	2	2	2	2	1	1	2	1	2	1	3	3	3	3	2	2	2	1	3	2	2	3
C6583P465	2	2	2	2	1	2	3	3	3	1	1	2	2	2	1	3	2	2	3	3	3	3	1	3	2	2	2	2	1	2	2	3	2	1	2	1	2	1	2	2	1	3	1	2	1	1	3	3	2
C2817P666	1	1	1	1	1	1	1	1	1	1	1	1	1	1	1	1	1	1	1	1	1	1	1	1	3	1	1	1	1	2	2	2	1	1	1	1	2	2	2	2	1	1	1	1	2	2	2	2	1
G24P74	3	3	3	3	3	3	3	3	3	3	3	3	3	3	3	3	3	3	3	3	3	3	3	3	3	3	3	3	3	3	3	3	3	3	3	3	3	3	3	3	3	3	3	3	3	3	3	3	3
C4576P3784	1	1	1	1	1	1	1	1	1	1	1	1	1	1	1	1	1	1	1	1	1	1	1	1	1	1	1	1	1	1	1	1	1	1	1	1	1	1	1	1	1	1	1	1	1	1	1	1	1
C684P573	3	3	3	3	3	3	3	3	3	3	3	3	3	3	3	3	3	3	3	3	3	3	3	3	2	2	1	2	3	2	1	2	2	3	3	3	2	3	3	2	1	2	3	3	3	2	1	1	3
C1137P1529	1	1	1	1	1	1	1	1	1	1	1	1	1	1	1	1	1	1	1	1	1	1	1	1	1	1	1	1	1	1	1	1	1	1	1	1	1	1	1	1	1	1	1	1	1	1	1	1	1
C790P473	1	2	1	2	1	2	2	1	2	1	2	1	1	1	2	1	1	1	2	2	2	2	2	1	1	1	1	1	1	1	1	1	1	1	1	1	1	1	1	1	1	1	1	1	1	1	1	1	1
C1486P605	1	1	1	1	1	1	1	1	1	1	1	1	1	1	1	1	1	1	1	1	1	1	1	1	1	2	1	2	2	1	2	1	2	1	1	1	2	1	1	1	2	1	2	2	1	2	2	1	2
C1073P159	1	1	1	1	1	1	1	1	1	1	1	1	1	1	1	1	1	1	1	1	1	1	1	1	2	2	2	2	3	1	3	2	1	1	2	2	2	2	3	1	1	2	3	3	1	2	1	2	2
C7709P188	1	1	1	1	1	1	1	1	1	1	1	1	1	1	1	1	1	1	1	1	1	1	1	1	1	1	1	1	1	1	1	1	1	1	1	1	1	1	1	1	1	1	1	1	1	1	1	1	2
C142P252	3	3	3	3	3	3	3	3	3	3	3	3	3	3	3	3	3	3	3	3	3	3	3	3	3	3	3	3	3	3	3	3	3	3	3	3	3	3	3	3	3	3	3	3	3	3	3	3	2
C5680P109	3	3	3	3	3	3	3	3	3	3	3	3	3	3	3	3	3	3	3	3	3	3	3	3	1	1	1	1	1	1	1	1	1	1	1	1	1	1	1	1	1	1	1	1	1	1	1	1	2
C1043P559	2	2	3	2	1	2	2	2	2	2	3	2	3	2	2	2	3	1	3	2	2	2	1	2	2	2	1	1	2	2	1	1	1	1	2	1	1	3	3	3	3	2	2	3	3	2	3	2	2
C3909P380	1	1	1	1	1	1	1	1	1	1	1	1	1	1	1	1	1	1	1	1	1	1	1	1	1	1	1	1	1	1	1	1	1	1	1	1	1	1	1	1	1	1	1	1	1	1	1	1	1
C2769P512	1	1	1	1	1	1	1	1	1	1	1	1	1	1	1	1	1	1	1	1	1	1	1	1	1	2	2	2	1	2	1	1	1	2	2	2	2	2	1	2	1	1	2	1	1	2	2	1	1
C1915P1162	1	1	1	1	1	1	1	1	1	1	1	1	1	1	1	1	1	1	1	1	1	1	1	1	2	2	2	2	2	2	1	2	2	1	2	1	1	2	2	2	3	2	3	2	2	2	3	2	2
C6755P790	1	1	1	1	1	1	1	1	1	1	1	1	1	1	1	1	1	1	1	1	1	1	1	1	1	1	1	1	1	1	1	1	1	1	1	1	1	1	1	1	1	1	1	1	1	1	1	1	1
G21P360	2	3	2	3	2	3	3	3	2	3	2	2	3	3	3	3	2	2	3	2	3	3	2	3	3	3	3	3	3	3	3	3	3	3	3	3	3	3	3	3	3	3	3	3	3	3	3	3	2
C2102P607	1	1	1	1	1	1	1	1	1	1	1	1	1	1	1	1	1	1	1	1	1	1	1	1	1	1	1	1	1	1	1	1	1	1	1	1	1	1	1	1	1	1	1	1	1	1	1	1	1
C3482P668	2	2	3	2	1	2	2	2	2	2	2	1	1	2	1	3	2	2	3	2	2	3	2	3	2	1	2	1	2	2	1	1	1	1	1	2	1	2	2	2	2	2	2	2	1	2	1	1	1
C2583P371	1	1	1	1	1	1	1	1	1	1	1	1	1	1	1	1	1	1	1	1	1	1	1	1	1	1	1	1	1	1	1	1	1	1	1	1	1	1	1	1	1	1	1	1	1	1	1	1	1
C5636P122	2	3	2	2	3	3	3	2	2	2	3	2	2	3	3	2	3	3	2	2	2	2	2	3	3	3	3	3	3	3	3	3	3	3	3	3	3	3	3	3	3	3	3	3	3	3	3	3	3
C4110P249	2	2	2	2	2	2	2	2	2	2	2	2	2	2	2	2	2	2	2	2	2	2	2	2	2	2	2	3	2	3	2	2	3	2	3	2	2	2	2	2	2	2	2	3	2	2	3	2	2
C1180P427	2	2	2	2	2	1	2	2	3	3	2	3	2	2	1	1	2	2	2	2	2	1	2	1	2	2	1	2	2	2	2	2	3	1	1	1	1	2	2	3	1	2	1	2	1	2	2	2	2
C98P235	3	3	3	3	3	3	3	3	3	3	3	3	3	3	3	3	3	3	3	3	3	3	3	3	2	3	3	2	2	3	2	3	2	3	3	3	3	3	2	2	3	3	3	2	3	3	2	3	3
C8125P384	2	2	2	1	1	3	2	2	3	2	1	2	2	2	1	2	2	2	3	2	2	2	2	2	2	2	1	2	2	2	1	2	3	2	2	2	3	2	3	3	1	3	2	2	2	3	2	3	2
G17P137	3	3	3	3	3	3	3	3	3	3	3	3	3	3	3	3	3	3	3	3	3	3	3	3	3	3	3	3	3	3	3	3	3	3	3	3	3	3	3	3	3	3	3	3	3	3	3	3	3
C5812P593	2	2	3	2	1	3	1	2	2	1	3	2	1	3	3	3	2	1	1	2	1	2	2	2	2	2	3	2	2	3	2	2	2	2	2	2	2	1	3	2	2	2	1	3	2	2	3	1	3
C3763P929	1	1	1	1	1	1	1	1	1	1	1	1	1	1	1	1	1	1	1	1	1	1	1	1	1	1	1	1	1	1	1	1	1	1	1	1	1	1	1	1	1	1	1	1	1	1	1	1	1
C7430P1262	1	3	2	2	2	2	2	2	2	2	2	2	2	2	2	2	2	2	2	2	2	2	2	2	2	2	2	1	1	1	1	2	2	3	2	3	1	2	2	1	2	1	1	3	2	2	2	3	1
C1513P563	1	2	2	2	2	1	2	2	1	1	1	2	1	2	2	2	2	1	2	1	2	1	1	2	2	3	2	2	3	3	2	2	3	3	3	3	3	3	3	2	2	2	3	3	3	2	2	2	1
C435P628	3	3	3	3	3	3	3	3	3	3	3	3	3	3	3	3	3	3	3	3	3	3	3	3	2	3	3	3	2	3	2	3	2	2	2	2	2	2	3	2	2	3	2	2	2	2	3	3	2
C8120P393	3	3	3	0	3	3	3	3	3	3	3	3	0	3	3	0	3	3	3	3	3	0	3	3	3	3	3	3	0	3	3	3	0	0	3	3	0	3	3	3	0	3	3	0	3	3	3	3	3
C6024P311	3	3	3	3	3	3	3	3	3	3	3	3	3	3	3	3	3	3	3	3	3	3	3	3	3	3	3	3	3	3	3	3	3	3	3	3	3	3	3	3	3	3	3	3	3	3	3	3	3
G16P850	2	1	2	1	1	2	1	2	1	1	1	1	1	1	1	2	2	2	2	1	2	2	1	2	1	1	1	1	1	1	1	1	1	1	1	1	1	1	1	1	1	1	1	1	1	1	1	1	1
C7937P506	2	2	2	3	1	3	1	3	2	2	2	2	3	3	3	2	2	3	3	1	1	2	1	1	1	2	1	1	2	1	1	1	1	1	2	1	2	2	1	1	2	2	1	2	2	1	2	1	2
C5578P867	1	2	1	2	2	1	1	1	2	2	2	1	2	1	1	2	1	1	1	2	1	2	2	2	2	2	1	3	3	1	2	2	2	2	2	1	2	1	1	2	2	2	2	3	1	3	2	2	2
C3876P1845	1	1	1	1	1	1	1	1	1	1	1	1	1	1	1	1	1	1	1	1	1	1	1	1	1	1	1	1	1	1	1	1	1	1	1	1	1	1	1	1	1	1	1	1	1	1	1	1	1
C27P1776	3	2	2	3	3	2	2	2	3	3	2	2	3	2	2	2	2	2	3	3	2	3	2	2	1	1	1	1	1	1	1	1	1	1	1	1	1	1	1	1	1	1	1	1	1	1	1	1	3
C7771P894	2	2	2	2	2	2	2	1	3	1	3	2	1	1	2	1	3	2	2	2	2	2	3	1	1	1	1	1	1	1	1	1	1	1	1	1	1	1	1	1	1	1	1	1	1	1	1	1	1
C857P821	3	3	3	3	3	3	3	3	3	3	3	3	3	3	3	3	3	3	3	3	3	3	3	3	3	3	3	3	3	3	3	3	3	3	3	3	3	3	3	3	3	3	3	3	3	3	3	3	3
C2488P696	1	2	1	1	2	2	1	2	1	1	2	1	2	2	1	2	2	2	1	2	1	2	2	2	3	2	3	2	3	2	2	3	3	2	3	2	3	3	3	2	2	3	3	2	2	2	3	3	2
C2586P204	2	2	2	3	1	2	1	3	2	2	2	2	2	3	3	2	2	3	3	1	1	2	1	1	2	2	1	2	1	1	1	1	2	3	3	3	3	3	3	1	1	2	3	2	3	1	2	2	2
C440P376	2	2	2	2	2	2	2	3	3	2	3	2	2	1	3	3	3	2	2	2	1	2	1	2	1	2	1	1	2	1	2	1	1	1	1	2	1	1	2	1	1	2	2	2	1	1	1	2	1
C1955P491	2	2	3	3	2	1	1	2	2	2	2	2	2	2	1	2	1	2	2	2	1	3	2	2	3	3	3	3	3	3	3	3	3	3	3	3	3	3	3	3	3	3	3	3	3	3	3	3	2
C6492P151	3	3	3	3	3	3	3	3	3	3	3	3	3	3	3	3	3	3	3	3	3	3	3	3	2	2	2	2	3	1	2	3	1	2	2	1	3	3	2	2	3	3	2	2	1	3	2	2	1
C7561P266	3	2	2	3	3	2	2	3	3	2	2	2	2	3	2	3	2	3	2	2	3	3	3	3	2	2	2	2	3	2	3	2	2	2	2	2	2	2	3	3	2	2	2	3	2	2	2	2	3
C7431P153	1	1	1	1	1	1	1	1	1	1	1	1	1	1	1	1	1	1	1	1	1	1	1	1	2	2	2	2	2	2	1	2	2	2	2	1	1	2	2	2	3	2	3	2	2	2	3	2	3
C6652P175	3	3	3	3	3	3	3	3	3	3	3	3	3	3	3	3	3	3	3	3	3	3	3	3	3	3	3	3	3	3	3	3	3	3	3	3	3	3	3	3	3	3	3	3	3	3	3	3	3
C2621P565	3	3	3	3	3	3	3	3	3	3	3	3	3	3	0	3	3	3	3	3	0	0	0	0	3	3	3	3	3	3	3	3	3	3	3	3	3	3	3	3	3	3	3	3	3	3	3	3	2
C1526P774	2	2	3	2	1	3	1	2	2	1	3	2	1	2	2	2	2	1	2	3	1	2	3	2	2	2	3	2	2	2	2	2	2	2	3	2	2	1	3	2	2	2	2	2	2	2	2	1	3
C3532P392	3	2	2	2	3	3	3	3	3	3	3	3	2	2	2	3	3	3	2	2	2	2	2	3	1	1	1	1	1	1	1	1	1	1	1	1	1	1	1	1	1	1	1	1	1	1	1	1	1
C758P972	2	2	1	2	3	3	3	2	3	2	2	2	2	2	3	2	2	2	3	3	3	1	3	2	2	2	2	3	1	2	3	3	2	1	1	3	2	2	1	2	2	2	3	3	2	2	1	2	2
C2278P790	2	2	1	2	2	2	1	3	2	1	3	1	2	2	1	2	2	2	1	2	1	3	2	2	2	2	2	3	3	1	2	3	2	2	3	1	2	3	2	2	1	2	3	2	2	3	3	2	2
C5193P405	1	1	1	1	1	1	1	1	1	1	1	1	1	1	1	1	1	1	1	1	1	1	1	1	2	1	1	1	1	2	1	1	2	1	2	1	1	1	1	2	2	1	2	1	2	2	2	2	1
C7217P720	1	1	1	1	1	1	1	1	1	1	1	1	1	1	1	1	1	1	1	1	1	1	1	1	1	2	2	1	1	2	1	2	1	2	2	2	1	2	2	2	1	2	1	1	2	1	1	2	2
C5413P468	3	2	3	3	3	3	3	2	2	3	2	2	3	3	2	2	2	3	3	3	3	2	3	3	2	2	2	3	1	3	2	2	3	2	3	2	2	1	2	2	2	2	1	3	1	2	3	2	2
C1061P507	1	1	1	1	1	1	1	1	1	1	1	1	1	1	1	1	1	1	1	1	1	1	1	1	1	1	1	1	1	1	1	1	1	1	1	1	1	1	1	1	1	1	1	1	1	1	1	1	1
C5369P603	3	0	3	0	0	3	3	0	3	3	3	3	0	0	0	0	3	3	3	3	3	0	0	0	3	3	3	0	0	3	3	3	3	3	3	3	3	3	3	3	3	3	3	3	3	3	3	3	1
C1751P356	2	2	2	3	2	2	2	2	1	3	2	2	2	2	2	2	1	3	1	2	1	2	2	2	3	3	3	3	3	3	3	3	3	3	3	3	3	3	3	3	3	3	3	3	3	3	3	3	1
C1622P256	2	1	2	1	2	2	2	1	1	2	1	2	2	2	2	2	2	2	2	2	2	1	2	1	2	2	2	1	1	3	2	1	2	2	1	3	2	1	2	2	3	2	1	2	2	1	1	2	2
C3202P694	2	2	3	2	1	2	1	2	2	1	3	2	1	3	3	3	2	1	1	2	1	2	2	2	3	3	3	3	3	3	3	3	3	3	3	3	3	3	3	3	3	3	3	3	3	3	3	3	3
C5629P638	3	3	3	3	3	3	3	3	3	3	3	3	3	3	3	3	3	3	3	3	3	3	3	3	3	2	2	1	1	3	3	3	3	3	2	3	2	3	3	3	3	2	3	1	3	1	3	2	3
C2227P432	3	3	3	3	3	3	3	3	3	3	3	3	3	3	3	3	3	3	3	3	3	3	3	3	2	2	2	2	2	1	2	2	2	2	2	2	2	3	2	2	2	2	3	1	2	2	1	3	2
C5856P240	1	1	1	1	1	1	1	1	1	1	1	1	1	1	1	1	1	1	1	1	1	1	1	1	2	1	1	2	1	2	1	1	1	2	1	1	1	2	2	2	1	1	1	2	1	2	1	1	1
C5493P190	2	2	1	2	2	2	1	3	2	1	3	1	2	2	1	2	2	2	1	2	1	3	2	2	3	2	3	2	3	2	2	3	3	2	3	2	3	3	3	2	2	3	3	2	2	3	3	3	3
C1421P510	3	3	3	3	3	3	3	3	3	3	3	3	3	3	3	3	3	3	3	3	3	3	3	3	3	3	3	3	3	3	3	3	3	3	3	3	3	3	3	3	3	3	3	3	3	3	3	3	3
C4284P405	3	3	3	3	3	3	3	3	3	3	3	3	3	3	3	3	3	3	3	3	3	3	3	3	3	3	3	3	3	3	3	3	3	3	3	3	3	3	3	3	3	3	3	3	3	3	3	3	3
C898P533	2	1	1	2	1	2	2	2	1	1	1	1	1	1	2	2	1	2	1	2	2	2	2	2	3	2	3	3	2	3	2	3	3	2	2	2	2	2	2	2	3	3	3	2	3	3	3	3	3
C2696P1802	1	1	1	1	1	1	1	1	1	1	1	1	1	1	1	1	1	1	1	1	1	1	1	1	1	1	1	1	1	1	1	1	1	1	1	1	1	1	1	1	1	1	1	1	1	1	1	1	1
C1497P555	1	1	1	1	1	1	1	1	1	1	1	1	1	1	1	1	1	1	1	1	1	1	1	1	1	1	1	1	1	1	1	1	1	1	1	1	1	1	1	1	1	1	1	1	1	1	1	1	1
C5847P279	1	1	1	1	1	1	1	1	1	1	1	1	1	1	1	1	1	1	1	1	1	1	1	1	1	2	2	2	2	1	1	1	1	1	2	1	2	2	1	1	1	1	1	2	1	1	2	2	2
C4410P610	3	3	3	3	3	3	3	3	3	3	3	3	3	3	3	3	3	3	3	3	3	3	3	3	3	3	3	3	3	3	3	3	3	3	3	3	3	3	3	3	3	3	3	3	3	3	3	3	2
C6848P565	3	3	3	3	3	3	3	3	3	3	3	3	3	3	3	3	3	3	3	3	3	3	3	3	3	3	3	3	3	3	3	3	3	3	3	3	3	3	3	3	3	3	3	3	3	3	3	3	3
C2180P437	2	2	3	3	2	1	1	2	2	3	2	3	3	2	2	2	2	2	2	2	2	2	2	1	1	1	1	1	1	1	1	1	1	1	1	1	1	1	1	1	1	1	1	1	1	1	1	1	2
C3075P208	2	2	2	2	2	2	2	3	3	1	2	3	3	3	1	2	3	2	2	2	1	2	1	1	2	2	2	2	2	2	1	2	2	2	2	1	1	2	2	2	3	2	3	2	2	2	3	2	2
C6114P648	3	2	3	2	3	3	3	2	3	2	3	2	3	2	2	3	3	2	2	2	3	3	2	2	2	2	1	2	2	2	1	2	1	1	3	2	2	3	1	1	3	1	1	1	2	2	3	3	3
C6041P172	3	3	3	3	3	3	3	3	3	3	3	3	3	3	3	3	3	3	3	3	3	3	3	3	2	2	2	3	3	3	1	1	2	1	2	2	3	2	1	2	2	2	2	2	3	3	3	2	3
C1309P200	1	1	1	1	1	1	1	1	1	1	1	1	1	1	1	1	1	1	1	1	1	1	1	1	1	1	1	1	1	1	1	1	1	1	1	1	1	1	1	1	1	1	1	1	1	1	1	1	1
C4606P737	1	1	1	1	1	1	1	1	1	1	1	1	1	1	1	1	1	1	1	1	1	1	1	1	1	2	2	2	2	2	2	1	1	2	1	2	1	2	2	1	1	1	2	2	2	1	1	1	2
C5653P801	3	3	3	3	3	3	3	3	3	3	3	3	3	3	3	3	3	3	3	3	3	3	3	3	1	1	1	1	1	1	1	1	1	1	1	1	1	1	1	1	1	1	1	1	1	1	1	1	2
C2317P439	2	2	3	2	2	2	1	2	1	3	2	2	1	2	2	2	1	3	2	2	1	2	2	2	2	1	1	2	1	2	2	1	2	1	1	2	1	1	2	2	1	1	1	1	2	1	1	2	2
C2683P159	3	3	3	3	3	3	3	3	3	3	3	3	3	3	3	3	3	3	3	3	3	3	3	3	1	1	1	1	1	1	1	1	1	1	1	1	1	1	1	1	1	1	1	1	1	1	1	1	2
C7565P477	1	1	1	1	1	1	1	1	1	1	1	1	1	1	1	1	1	1	1	1	1	1	1	1	1	1	1	1	1	1	1	1	1	1	1	1	1	1	1	1	1	1	1	1	1	1	1	1	1
C6370P434	1	1	1	1	1	1	1	1	1	1	1	1	1	1	1	1	1	1	1	1	1	1	1	1	1	1	1	1	1	1	1	1	1	1	1	1	1	1	1	1	1	1	1	1	1	1	1	1	1
C6467P94	1	2	1	2	2	2	2	1	2	1	2	1	2	1	2	1	2	1	1	1	2	2	1	1	1	1	1	1	1	1	1	1	1	1	1	1	1	1	1	1	1	1	1	1	1	1	1	1	2
C570P276	2	2	2	3	2	1	2	3	2	2	2	1	1	2	1	2	3	2	2	1	3	1	3	3	3	3	3	3	3	3	3	3	3	3	3	3	3	3	3	3	3	3	3	3	3	3	3	3	3
C4754P408	1	1	1	1	1	1	1	1	1	1	1	1	1	1	1	1	1	1	1	1	1	1	1	1	2	2	3	2	3	3	2	2	1	2	2	3	3	2	2	1	2	2	1	1	2	2	2	3	1
C4049P503	1	1	1	1	1	1	1	1	1	1	1	1	1	1	1	1	1	1	1	1	1	1	1	1	1	1	1	1	1	1	1	1	1	1	1	1	1	1	1	1	1	1	1	1	1	1	1	1	1
C8121P594	1	2	2	2	1	1	1	1	1	1	1	2	2	2	1	1	2	2	2	1	1	1	2	1	2	2	3	3	2	2	1	1	1	2	2	2	1	3	1	2	1	1	2	2	3	2	3	2	2
C6063P396	2	3	3	2	3	3	2	2	3	3	3	3	3	3	3	3	2	3	3	3	2	3	2	2	1	2	2	2	2	2	2	2	2	1	1	1	2	2	1	2	2	2	2	1	1	2	2	1	3
C6137P1923	1	1	1	1	1	1	1	1	1	1	1	1	1	1	1	1	1	1	1	1	1	1	1	1	1	1	1	1	1	1	1	1	1	1	1	1	1	1	1	1	1	1	1	1	1	1	1	1	1
C1963P1170	2	2	2	2	1	3	2	2	1	2	2	1	2	1	3	3	2	3	2	2	2	2	2	2	3	2	3	3	3	2	2	2	3	3	3	3	3	2	2	2	3	3	3	3	3	2	3	3	2
C4595P163	2	1	2	1	2	2	2	1	1	2	1	1	1	2	1	1	1	1	1	2	2	2	2	2	2	2	2	2	1	3	1	2	3	3	3	2	2	2	1	3	3	2	1	1	3	2	3	2	3
C7235P456	1	1	1	1	1	1	1	1	1	1	1	1	1	1	1	1	1	1	1	1	1	1	1	1	1	1	1	1	1	1	1	1	1	1	1	1	1	1	1	1	1	1	1	1	1	1	1	1	2
G19P216	3	3	3	3	3	3	3	3	3	3	3	3	3	3	3	3	3	3	3	3	3	3	3	3	3	3	3	3	3	3	3	3	3	3	3	3	3	3	3	3	3	3	3	3	3	3	3	3	3
C5182P66	3	2	2	2	3	3	3	3	3	3	3	2	2	2	3	3	2	2	2	3	3	3	2	3	3	3	3	3	3	3	3	3	3	3	3	3	3	3	3	3	3	3	3	3	3	3	3	3	2
C1140P567	3	2	3	2	3	2	3	2	3	2	3	2	3	2	2	3	3	2	2	2	3	3	2	2	3	3	3	3	3	3	3	3	3	3	3	3	3	3	3	3	3	3	3	3	3	3	3	3	3
C5342P697	2	3	2	2	3	2	2	3	2	2	2	3	2	2	2	2	2	2	3	3	2	2	2	2	3	3	3	3	3	3	3	3	3	3	3	3	3	3	3	3	3	3	3	3	3	3	3	3	3
C5322P733	2	3	3	3	3	2	2	2	2	3	3	2	2	2	3	2	2	3	2	3	2	3	2	3	2	2	2	2	3	1	2	3	2	2	2	1	3	3	2	1	2	2	2	2	1	3	2	2	2
C5931P2284	2	2	1	1	2	3	1	2	2	3	2	1	2	2	1	2	1	1	2	3	1	2	2	2	2	2	2	3	3	1	2	1	2	1	2	1	2	1	1	2	2	2	2	3	1	3	2	2	2
C4163P771	3	3	3	3	3	3	3	3	3	3	3	3	3	3	3	3	3	3	3	3	3	3	3	3	3	3	3	3	3	3	3	3	3	3	3	3	3	3	3	3	3	3	3	3	3	3	3	3	3
C346P140	1	1	1	1	1	1	1	1	1	1	1	1	1	1	1	1	1	1	1	1	1	1	1	1	1	2	2	2	2	2	2	1	1	2	1	2	1	2	2	1	1	1	2	2	2	1	1	1	2
C2959P902	1	1	1	1	1	1	1	1	1	1	1	1	1	1	1	1	1	1	1	1	1	1	1	1	2	2	2	1	1	1	1	2	1	3	2	3	1	2	2	1	2	1	1	3	3	2	2	3	1
C5104P874	3	3	3	3	3	3	3	3	3	3	3	3	3	3	3	3	3	3	3	3	3	3	3	3	3	3	3	3	3	3	3	3	3	3	3	3	3	3	3	3	3	3	3	3	3	3	3	3	2
C3605P437	3	2	2	3	3	2	2	3	3	2	2	2	2	3	2	3	2	3	2	2	3	3	3	3	1	2	1	1	2	2	2	1	1	2	2	2	2	2	2	2	1	1	1	2	1	1	1	1	2
C6991P1109	3	3	3	3	3	3	3	3	3	3	3	3	3	3	3	3	3	3	3	3	3	3	3	3	3	2	3	3	3	2	2	2	2	2	3	3	2	3	2	2	0	2	3	3	3	3	3	2	2
C5197P347	1	2	1	3	3	2	2	2	1	1	1	1	2	2	2	2	3	1	1	3	2	2	2	3	1	2	1	1	3	1	1	1	1	3	3	3	2	1	2	1	1	3	1	3	1	2	1	1	1
C4206P930	2	2	1	1	3	2	2	3	2	1	2	3	1	1	1	2	2	2	2	2	1	1	1	2	1	1	1	1	1	1	1	1	1	1	1	1	1	1	1	1	1	1	1	1	1	1	1	1	1
C3454P421	2	2	2	3	2	1	1	3	2	3	2	2	2	2	1	3	1	2	2	2	3	3	2	2	2	2	1	2	3	2	3	2	3	3	3	1	3	2	1	2	3	2	2	3	2	2	1	2	2
C6459P246	1	1	1	1	1	1	1	1	1	1	1	1	1	1	1	1	1	1	1	1	1	1	1	1	1	1	1	1	1	1	1	1	1	1	1	1	1	1	1	1	1	1	1	1	1	1	1	1	1
C3149P241	3	2	3	3	2	3	2	3	3	3	2	3	3	2	3	2	3	3	3	2	2	2	2	2	3	3	3	3	3	3	3	3	3	3	3	3	3	3	3	3	3	3	3	3	3	3	3	3	2
C2748P544	1	1	1	1	1	1	1	1	1	1	1	1	1	1	1	1	1	1	1	1	1	1	1	1	1	2	2	2	2	2	2	1	1	2	1	2	1	2	2	1	1	1	2	2	2	1	1	1	2
C5101P631	3	3	3	3	3	3	3	3	3	3	3	3	3	3	3	3	3	3	3	3	3	3	3	3	3	3	3	3	3	3	3	3	3	3	3	3	3	3	3	3	3	3	3	3	3	3	3	3	3
C1388P245	3	3	3	3	3	3	3	3	3	3	3	3	3	3	3	3	3	3	3	3	3	3	3	3	3	3	3	3	3	3	3	3	3	3	3	3	3	3	3	3	3	3	3	3	3	3	3	3	3
C2235P677	3	3	3	3	3	3	3	3	3	3	3	3	3	3	3	3	3	3	3	3	3	3	3	3	2	2	2	2	1	3	2	1	2	3	3	2	3	3	2	2	1	2	3	2	1	3	2	2	2
C3464P251	2	3	2	2	3	3	2	3	3	3	2	2	2	2	2	2	2	2	3	3	2	3	2	2	3	3	3	3	3	3	3	3	3	3	3	3	3	3	3	3	3	3	3	3	3	3	3	3	2
C6223P116	2	2	3	3	2	1	1	2	2	2	2	3	3	2	1	2	2	1	2	2	2	2	2	1	2	2	3	2	1	2	2	3	1	1	2	3	1	2	3	3	1	2	3	1	2	2	3	2	1
C3604P483	3	2	3	2	2	3	2	3	2	3	2	3	2	3	2	3	2	3	3	2	2	2	3	2	2	2	2	2	1	3	2	1	3	2	2	3	1	1	2	2	1	1	2	2	3	1	2	2	2
C4926P110	1	2	1	1	1	2	1	2	2	1	1	2	1	2	2	2	1	2	2	1	2	1	1	2	2	2	3	3	2	2	3	2	3	3	2	2	2	2	3	3	1	2	3	2	2	3	1	1	1
C5880P719	3	2	3	2	2	2	2	3	2	3	2	3	2	3	2	3	2	3	3	3	3	2	3	3	2	2	2	2	2	1	2	3	2	2	2	1	2	3	2	1	3	2	2	3	1	3	2	2	3
C6206P334	2	1	2	2	1	1	2	1	1	2	1	2	1	2	2	2	2	2	1	2	2	1	2	2	3	3	3	3	3	3	3	3	3	3	3	3	3	3	3	3	3	3	3	3	3	3	3	3	2
C4700P526	3	3	3	3	3	3	3	3	3	3	3	3	3	3	3	3	3	3	3	3	3	3	3	3	3	3	3	3	3	3	3	3	3	3	3	3	3	3	3	3	3	3	3	3	3	3	3	3	3
C2115P329	3	3	3	3	3	3	3	3	3	3	3	3	3	3	3	3	3	3	3	3	3	3	3	3	3	3	3	3	3	3	3	3	3	3	3	3	3	3	3	3	3	3	3	3	3	3	3	3	3
C1211P408	1	2	1	3	3	2	2	2	1	1	1	1	2	2	2	2	3	1	1	3	2	2	2	3	3	2	1	1	3	2	2	2	1	3	1	3	3	2	3	2	1	3	1	3	2	3	2	2	1
C6456P265	3	2	2	2	3	2	2	2	3	3	3	2	2	2	2	3	2	3	2	3	2	3	3	2	2	2	3	2	1	2	3	3	2	1	1	1	2	1	1	2	3	2	1	1	2	2	3	3	3
C4124P412	1	1	1	1	1	1	1	1	1	1	1	1	1	1	1	1	1	1	1	1	1	1	1	1	2	1	1	2	1	2	2	2	2	1	1	2	2	2	1	2	1	1	2	2	2	2	1	2	2
G14P49	2	1	2	1	1	2	1	2	1	1	1	1	1	1	1	2	2	2	2	1	2	2	1	2	1	1	1	1	1	1	1	1	1	1	1	1	1	1	1	1	1	1	1	1	1	1	1	1	1
C6406P297	2	2	1	2	2	3	3	2	3	1	2	2	3	2	2	2	3	1	2	1	3	2	2	1	2	2	2	2	1	3	2	1	2	2	2	3	2	1	2	3	1	2	2	1	3	1	2	2	2
C2152P698	2	2	2	1	2	2	1	1	2	2	2	1	1	1	2	2	2	2	2	2	1	2	3	2	1	1	1	1	1	1	1	1	1	1	1	1	1	1	1	1	1	1	1	1	1	1	1	1	2
C3580P598	2	2	2	3	2	1	2	3	2	2	2	1	1	2	1	2	3	2	2	1	3	1	3	3	2	3	2	3	3	3	3	2	3	2	3	2	3	2	3	3	2	3	3	2	2	2	2	2	3
G15P275	1	1	1	1	1	1	1	1	1	1	1	1	1	1	1	1	1	1	1	1	1	1	1	1	3	3	3	3	3	3	3	3	3	3	3	3	3	3	3	3	3	3	3	3	3	3	3	3	2
C1176P225	3	2	2	3	1	3	3	2	3	2	2	2	3	1	1	1	2	2	3	3	1	3	3	1	2	2	1	3	3	2	1	2	2	1	3	1	1	3	2	2	2	1	2	3	3	2	2	3	2
C2081P479	2	2	2	3	1	3	1	3	2	2	2	2	3	2	3	2	2	3	3	1	1	1	1	1	2	2	3	2	3	3	3	3	2	2	1	2	1	1	2	3	2	2	2	1	1	3	2	2	2
C3012P804	1	1	1	1	1	1	1	1	1	1	1	1	1	1	1	1	1	1	1	1	1	1	1	1	1	1	1	1	1	1	1	1	1	1	1	1	1	1	1	1	1	1	1	1	1	1	1	1	3
C7387P1672	2	3	2	3	3	2	2	2	2	2	2	3	2	3	2	2	2	3	2	3	2	2	3	3	3	3	3	3	3	3	3	3	3	3	3	3	3	3	3	3	3	3	3	3	3	3	3	3	1
C3769P735	3	2	3	3	3	2	2	2	3	3	3	3	2	3	3	2	3	3	3	2	2	3	3	2	3	3	3	3	3	3	3	3	3	3	3	3	3	3	3	3	3	3	3	3	3	3	3	3	1
C4138P571	3	2	2	2	3	3	3	3	3	3	3	2	2	3	3	3	2	3	3	2	3	3	3	3	1	2	2	2	1	1	1	2	2	2	2	2	1	2	1	2	2	1	1	1	1	2	2	1	2
C6157P765	3	3	3	3	3	3	3	3	3	3	3	3	3	3	3	3	3	3	3	3	3	3	3	3	3	3	3	3	3	3	3	3	3	3	3	3	3	3	3	3	3	3	3	3	3	3	3	3	2
C624P380	3	3	3	3	3	3	3	3	3	3	3	3	3	3	3	3	3	3	3	3	3	3	3	3	3	3	3	3	3	3	3	3	3	3	3	3	3	3	3	3	3	3	3	3	3	3	3	3	3
C645P837	1	1	1	1	1	1	1	1	1	1	1	1	1	1	1	1	1	1	1	1	1	1	1	1	1	1	1	1	1	1	1	1	1	1	1	1	1	1	1	1	1	1	1	1	1	1	1	1	1
C5315P102	3	3	3	3	3	3	3	3	3	3	3	3	3	3	3	3	3	3	3	3	3	3	3	3	2	2	3	2	1	2	2	2	1	1	2	3	1	2	3	2	1	2	3	1	2	2	3	2	3
C1124P470	3	3	3	3	3	3	3	3	3	3	3	3	3	3	3	3	3	3	3	3	3	3	3	3	3	3	3	3	3	3	3	3	3	3	3	3	3	3	3	3	3	3	3	3	3	3	3	3	3
C940P207	3	2	2	3	3	3	2	2	3	3	2	2	3	2	3	2	2	3	3	2	3	3	2	2	2	2	2	1	2	3	2	3	2	3	2	2	2	2	3	1	3	3	3	1	2	1	3	3	3
C1452P133	2	1	1	2	1	1	1	2	2	1	2	1	1	1	1	1	1	1	1	1	1	2	1	2	2	1	2	1	1	2	1	1	2	2	1	2	2	1	2	1	2	2	1	1	1	1	1	2	2
C966P443	1	1	1	1	1	1	1	1	1	1	1	1	1	1	1	1	1	1	1	1	1	1	1	1	2	2	3	2	2	2	3	2	3	3	2	2	2	2	3	3	1	2	3	3	2	3	1	1	1
C1590P91	1	1	1	1	1	1	1	1	1	1	1	1	1	1	1	1	1	1	1	1	1	1	1	1	1	1	1	1	1	1	1	1	1	1	1	1	1	1	1	1	1	1	1	1	1	1	1	1	1
C6295P1252	2	1	2	1	1	2	2	2	2	2	2	1	2	1	2	2	2	1	2	1	2	2	1	1	2	2	3	3	2	2	2	3	3	3	2	3	3	1	1	1	1	1	2	1	1	2	1	2	1
C6344P286	2	1	1	2	2	1	2	1	2	2	2	2	2	2	2	1	1	1	1	2	1	1	2	1	2	3	2	3	2	2	3	3	3	3	3	2	3	2	2	2	2	2	2	2	3	2	3	3	2
C1785P815	3	3	3	3	3	3	3	3	3	3	3	3	3	3	3	3	3	3	3	3	3	3	3	3	3	3	3	3	3	3	3	3	3	3	3	3	3	3	3	3	3	3	3	3	3	3	3	3	3
C7961P457	1	1	1	1	1	1	1	1	1	1	1	1	1	1	1	1	1	1	1	1	1	1	1	1	2	1	3	1	1	1	1	2	1	3	1	2	1	2	1	1	3	1	1	3	3	3	2	2	1
C2486P297	1	1	1	1	1	1	1	1	1	1	1	1	1	1	1	1	1	1	1	1	1	1	1	1	1	1	1	1	1	1	1	1	1	1	1	1	1	1	1	1	1	1	1	1	1	1	1	1	1
C4019P613	1	1	1	1	1	1	1	1	1	1	1	1	1	1	1	1	1	1	1	1	1	1	1	1	2	2	1	2	3	2	2	2	3	3	2	1	3	2	1	2	3	2	1	3	2	2	1	2	1
C5171P540	1	1	1	1	1	1	1	1	1	1	1	1	1	1	1	1	1	1	1	1	1	1	1	1	2	2	2	2	2	3	2	1	2	2	1	3	2	1	2	3	1	2	2	1	3	1	2	2	1
G14P439	2	1	2	1	1	2	1	2	1	1	1	1	1	1	1	2	2	2	2	1	2	2	1	2	1	1	1	1	1	1	1	1	1	1	1	1	1	1	1	1	1	1	1	1	1	1	1	1	1
C2609P215	1	1	1	1	1	1	1	1	1	1	1	1	1	1	1	1	1	1	1	1	1	1	1	1	1	1	1	1	1	1	1	1	1	1	1	1	1	1	1	1	1	1	1	1	1	1	1	1	1
C3491P173	2	2	2	3	2	1	2	3	2	2	2	1	1	2	1	2	3	2	2	1	3	1	3	3	1	2	2	2	1	1	1	1	1	2	1	1	2	1	1	1	2	2	2	2	2	2	1	1	1
C673P134	2	1	3	1	1	2	2	2	3	3	3	1	3	1	2	2	3	1	3	1	2	2	1	1	2	2	2	2	3	3	2	2	2	2	1	2	2	2	2	2	2	2	1	2	2	3	2	1	3
C2529P553	3	3	3	3	3	3	3	3	3	3	3	3	3	3	3	3	3	3	3	3	3	3	3	3	3	3	3	3	3	3	3	3	3	3	3	3	3	3	3	3	3	3	3	3	3	3	3	3	3
C299P192	3	3	3	3	3	3	3	3	3	3	3	3	3	3	3	3	3	3	3	3	3	3	3	3	3	3	3	3	3	3	3	3	3	3	3	3	3	3	3	3	3	3	3	3	3	3	3	3	3
C1406P345	1	2	2	2	1	2	2	2	1	1	1	2	2	2	2	1	2	1	2	1	2	1	1	2	3	3	3	3	3	3	3	3	3	3	3	3	3	3	3	3	3	3	3	3	3	3	3	3	1
C3211P1348	1	1	1	1	1	1	1	1	1	1	1	1	1	1	1	1	1	1	1	1	1	1	1	1	1	1	1	1	1	1	1	1	1	1	1	1	1	1	1	1	1	1	1	1	1	1	1	1	1
C4090P366	2	1	2	2	1	1	2	1	1	2	1	2	1	2	2	2	2	2	1	2	2	1	2	2	3	3	3	3	3	3	3	3	3	3	3	3	3	3	3	3	3	3	3	3	3	3	3	3	2
C3447P640	2	2	1	2	3	3	3	2	2	2	2	2	2	2	3	2	2	2	3	3	3	1	2	2	3	2	3	3	2	2	3	3	2	2	2	3	2	2	2	2	3	3	3	3	2	2	2	2	3
C2877P313	1	2	1	2	1	2	2	1	2	1	1	1	1	1	2	1	1	2	2	2	2	2	1	1	2	2	3	3	3	2	1	1	1	2	2	2	1	3	1	2	1	1	2	2	3	2	3	1	1
C926P130	2	2	3	2	2	2	2	1	1	2	1	2	2	3	1	1	2	2	2	2	3	2	3	2	3	3	3	3	3	3	3	3	3	3	3	3	3	3	3	3	3	3	3	3	3	3	3	3	3
C1852P130	3	3	3	3	3	3	3	3	3	3	3	3	3	3	3	3	3	3	3	3	3	3	3	3	2	3	2	3	2	2	3	2	2	3	2	3	2	3	3	2	2	2	3	2	2	2	3	3	2
C326P594	2	2	2	1	2	2	1	1	2	2	2	1	2	1	2	2	2	2	2	2	1	2	3	2	1	1	1	1	1	1	1	1	1	1	1	1	1	1	1	1	1	1	1	1	1	1	1	1	1
C3462P759	1	2	2	2	1	2	1	2	2	1	2	2	1	2	2	2	2	1	1	1	1	2	1	1	1	1	1	1	1	1	1	1	1	1	1	1	1	1	1	1	1	1	1	1	1	1	1	1	2
C5491P339	3	3	3	3	3	3	3	3	3	3	3	3	3	3	3	3	3	3	3	3	3	3	3	3	3	3	3	3	3	3	3	3	3	3	3	3	3	3	3	3	3	3	3	3	3	3	3	3	3
C5726P659	3	3	3	3	3	3	3	3	3	3	3	3	3	3	3	3	3	3	3	3	3	3	3	3	3	3	3	3	3	3	3	3	3	3	3	3	3	3	3	3	3	3	3	3	3	3	3	3	3
C7110P1528	1	2	2	1	1	2	1	2	2	2	2	2	1	1	2	1	1	1	2	1	1	2	1	2	2	2	3	2	2	3	3	1	2	2	2	2	2	2	2	1	3	1	1	2	3	1	2	2	1
C4326P158	3	3	3	3	3	3	3	3	3	3	3	3	3	3	3	3	3	3	3	3	3	3	3	3	2	2	2	3	3	2	1	1	1	2	2	2	1	3	1	2	1	1	1	2	2	2	3	1	3
C4925P249	2	3	3	2	3	2	2	2	3	2	3	3	2	2	2	2	3	3	2	3	2	2	3	2	3	3	3	3	3	3	3	3	3	3	3	3	3	3	3	3	3	3	3	3	3	3	3	3	3
C182P470	2	3	2	2	3	3	2	3	3	2	3	2	3	2	2	2	2	2	3	2	2	3	2	2	1	1	1	1	1	1	1	1	1	1	1	1	1	1	1	1	1	1	1	1	1	1	1	1	3
C5955P626	2	2	2	2	1	3	2	2	1	1	2	1	2	2	3	3	2	2	2	2	2	3	2	3	2	1	1	2	2	1	2	1	2	1	1	1	1	1	2	2	1	1	1	2	1	1	2	1	1
C3846P887	1	1	1	1	1	1	1	1	1	1	1	1	1	1	1	1	1	1	1	1	1	1	1	1	2	2	2	2	2	2	1	2	2	1	2	1	1	2	2	2	3	2	3	2	2	2	3	2	2
C2600P690	3	3	3	3	3	3	3	3	3	3	3	3	3	3	3	3	3	3	3	3	3	3	3	3	2	2	2	2	1	3	2	1	2	3	3	2	3	3	2	2	1	2	3	2	1	3	2	2	2
C3011P342	3	2	3	2	3	2	3	2	3	2	3	2	3	2	2	3	3	2	2	2	3	3	2	2	2	2	1	2	2	2	1	2	1	1	3	2	2	3	1	1	3	2	1	1	2	2	3	3	3
C2330P483	2	3	2	3	3	3	3	3	2	3	3	3	3	3	3	2	2	3	3	2	3	2	3	2	1	1	0	1	1	1	0	1	0	0	1	1	1	1	0	0	1	1	0	0	1	1	1	1	2
C5460P1219	3	3	3	3	3	3	3	3	3	3	3	3	3	3	3	3	3	3	3	3	3	3	3	3	3	3	3	3	3	3	3	3	3	3	3	3	3	3	3	3	3	3	3	3	3	3	3	3	3
C7112P826	3	2	2	3	3	3	2	2	3	3	3	2	2	2	3	2	2	2	2	3	2	2	3	2	2	3	3	3	2	3	2	3	2	2	2	2	2	2	3	2	2	3	2	2	2	2	3	3	3
C1354P320	3	3	3	3	3	3	3	3	3	3	3	3	3	3	3	3	3	3	3	3	3	3	3	3	3	3	3	0	0	3	3	3	3	3	3	3	3	0	3	3	3	3	3	3	3	3	0	3	3
C5806P60	3	3	3	3	3	3	3	3	3	3	3	3	3	3	3	3	3	3	3	3	3	3	3	3	3	3	3	3	3	3	3	3	3	3	3	3	3	3	3	3	3	3	3	3	3	3	3	3	3
C2815P387	2	2	1	2	3	2	2	2	2	3	3	1	2	2	2	2	1	2	1	1	2	1	3	2	2	2	2	2	3	2	1	3	2	2	2	1	2	1	1	3	2	3	1	3	3	2	2	1	2
C1934P740	2	2	2	1	3	3	2	2	1	2	2	2	3	3	2	3	3	2	2	2	2	2	3	1	3	2	3	3	3	2	3	3	3	3	3	2	3	3	3	2	2	3	3	2	2	3	2	3	3
C5292P259	3	3	3	3	3	3	3	3	3	3	3	3	3	3	3	3	3	3	3	3	3	3	3	3	3	3	3	3	3	3	3	3	3	3	3	3	3	3	3	3	3	3	3	3	3	3	3	3	3
C961P288	2	2	3	2	1	2	2	2	1	2	1	2	2	2	2	2	2	2	3	3	3	3	2	2	2	1	2	1	2	2	1	2	2	1	2	1	2	1	1	2	2	2	1	2	2	2	1	1	3
C1981P212	2	3	2	3	3	2	2	2	2	2	2	3	2	3	2	2	2	3	2	3	2	2	3	3	1	2	2	2	1	1	2	2	2	2	2	1	1	2	2	1	2	2	2	2	2	1	2	2	2
C5139P429	3	3	3	3	3	3	3	3	0	3	3	3	0	3	3	3	3	3	0	3	3	0	3	3	1	2	1	1	2	2	2	2	1	2	1	1	1	1	2	1	2	2	2	1	1	1	2	2	3
C5248P410	3	3	3	3	3	3	3	3	3	3	3	3	3	3	3	3	3	3	3	3	3	3	3	3	1	1	1	1	1	1	1	1	1	1	1	1	1	1	1	1	1	1	1	1	1	1	1	1	2
C2584P358	2	2	3	3	1	2	2	1	2	2	2	1	2	3	3	2	2	3	2	1	3	2	3	2	1	3	2	2	2	2	2	2	2	2	2	2	2	2	2	2	2	2	2	2	2	2	2	2	3
C1259P2184	2	1	2	1	2	1	2	1	2	2	1	2	1	1	1	1	2	1	1	2	2	2	2	2	2	1	1	2	1	1	1	1	2	2	2	2	2	2	2	1	1	1	2	2	2	1	1	2	2
C5425P663	3	3	3	3	3	3	3	3	3	3	3	3	3	3	3	3	3	3	3	3	3	3	3	3	3	3	3	3	3	3	3	3	3	3	3	3	3	3	3	3	3	3	3	3	3	3	3	3	3
C5879P205	2	2	3	2	2	2	1	2	1	3	2	2	1	2	2	2	1	3	2	2	1	2	2	2	2	1	1	2	1	2	2	1	2	1	1	2	1	1	2	2	1	1	1	1	2	1	1	2	2
C4388P391	2	2	3	2	1	2	2	2	2	2	1	2	2	2	2	2	2	2	3	3	3	3	2	2	2	2	2	2	1	2	3	1	1	2	2	3	2	3	3	1	1	1	2	1	2	1	2	3	2
C8123P1427	3	3	3	3	3	3	3	3	3	3	3	3	3	3	3	3	3	3	3	3	3	3	3	3	3	3	3	3	3	3	3	3	3	3	3	3	3	3	3	3	3	3	3	3	3	3	3	3	3
C5048P133	3	3	3	3	3	3	3	3	3	3	3	3	3	3	3	3	3	3	3	3	3	3	3	3	3	3	3	3	3	3	3	3	3	3	3	3	3	3	3	3	3	3	3	3	3	3	3	3	3
C3316P495	2	2	2	3	1	2	1	3	2	2	2	2	2	3	3	2	2	3	3	1	1	2	1	1	1	2	1	1	1	1	1	1	1	2	2	2	2	2	2	1	1	2	2	1	2	1	2	1	2
C7463P851	2	3	2	3	3	2	2	2	2	2	2	3	2	3	2	2	2	3	2	3	2	2	3	3	3	3	3	3	3	3	3	3	3	3	3	3	3	3	3	3	3	3	3	3	3	3	3	3	2
C2803P689	2	3	2	2	3	3	2	3	3	3	2	2	2	2	2	2	2	2	3	3	2	3	2	2	3	3	3	3	3	3	3	3	3	3	3	3	3	3	3	3	3	3	3	3	3	3	3	3	2
C235P283	2	2	2	2	3	2	3	2	2	3	1	2	3	1	1	1	2	3	3	2	3	2	2	2	1	1	1	1	1	1	1	1	1	1	1	1	1	1	1	1	1	1	1	1	1	1	1	1	1
C4855P550	2	2	2	2	2	2	2	2	2	2	2	2	2	2	2	2	2	2	2	2	2	2	2	2	3	2	2	2	3	2	3	2	3	3	3	3	3	3	2	3	3	2	3	3	3	3	2	2	2
C2553P621	2	1	1	2	1	1	2	2	1	1	1	1	1	1	1	1	2	1	1	1	2	1	2	2	3	3	3	3	3	3	3	3	3	3	3	3	3	3	3	3	3	3	3	3	3	3	3	3	3
C2772P203	2	2	1	2	3	2	2	2	2	3	3	1	2	2	2	2	2	2	1	1	2	1	3	2	2	3	3	2	3	3	2	3	3	2	3	2	3	2	2	3	3	3	2	3	3	3	2	2	2
C942P388	2	2	2	3	2	2	2	2	1	3	2	2	2	2	2	2	1	3	1	2	1	2	2	2	2	2	2	2	1	3	2	1	3	1	2	3	1	1	2	2	1	1	2	2	3	1	2	2	1
C5312P210	1	1	1	1	1	1	1	1	1	1	1	1	1	1	1	1	1	1	1	1	1	1	1	1	1	1	1	1	1	0	0	0	1	1	1	0	1	1	1	0	1	1	1	0	0	0	1	0	1
C1453P117	3	3	3	3	3	3	3	3	3	3	3	3	3	3	3	3	3	3	3	3	3	3	3	3	3	3	3	3	3	3	3	3	3	3	3	3	3	3	3	3	3	3	3	3	3	3	3	3	2
C419P225	2	1	1	2	1	2	2	2	1	2	1	1	2	2	2	2	1	1	2	1	2	2	1	2	2	2	2	3	3	2	1	1	1	2	2	2	1	2	1	2	1	1	1	2	2	2	3	1	2
C1193P341	2	2	2	2	1	3	2	3	1	3	3	2	2	2	2	3	2	2	3	3	3	2	3	2	1	2	2	2	1	2	1	1	1	2	2	2	2	2	2	2	1	1	2	1	1	2	1	1	2
C460P293	2	2	2	1	2	3	3	2	2	2	2	2	1	2	3	1	2	3	2	2	2	1	2	2	3	3	3	3	3	3	3	3	3	3	3	3	3	3	3	3	3	3	3	3	3	3	3	3	2
C1695P80	2	1	1	2	1	1	1	2	2	1	2	1	1	1	1	1	1	1	1	1	1	2	1	2	1	1	1	1	1	1	1	1	1	1	1	1	1	1	1	1	1	1	1	1	1	1	1	1	1
C2861P95	3	3	3	3	3	3	3	3	3	3	3	3	3	3	3	3	3	3	3	3	3	3	3	3	3	3	3	3	3	3	3	3	3	3	3	3	3	3	3	3	3	3	3	3	3	3	3	3	2
C7958P547	1	1	1	1	1	1	1	1	1	1	1	1	1	1	1	1	1	1	1	1	1	1	1	1	2	1	2	1	1	2	1	1	2	2	1	2	2	1	2	1	2	2	1	1	1	1	1	2	2
C6229P771	3	3	3	0	1	3	1	3	3	1	3	3	1	3	3	3	3	1	1	3	1	3	3	3	3	1	3	3	1	3	3	1	3	1	3	1	1	1	3	3	1	3	1	3	1	3	3	1	1
C3900P464	1	1	1	1	1	1	1	1	1	1	1	1	1	1	1	1	1	1	1	1	1	1	1	1	2	3	3	3	3	2	2	3	2	2	2	3	2	2	2	3	3	2	2	2	3	2	2	2	2
C22P657	3	3	3	3	3	3	3	3	3	3	3	3	3	3	3	3	3	3	3	3	3	3	3	3	2	2	1	2	3	2	2	2	3	3	2	1	3	2	1	2	3	2	1	3	2	2	1	2	3
C1447P327	3	3	3	3	3	3	0	3	3	3	3	3	3	3	3	3	3	3	3	3	3	3	3	3	2	2	1	2	2	2	2	1	0	2	2	2	2	3	3	3	3	3	2	3	3	2	3	2	3
C2716P354	3	2	3	3	2	2	3	3	2	3	2	3	2	2	3	2	2	3	3	3	3	2	2	3	3	1	2	2	2	2	2	2	2	2	2	2	2	2	2	2	2	2	2	2	2	2	2	2	2
C3944P361	3	3	3	3	3	3	3	3	3	3	3	3	3	3	3	3	3	3	3	3	3	3	3	3	3	3	3	3	3	3	3	3	3	3	3	3	3	3	3	3	3	3	3	3	3	3	3	3	3
C4293P414	1	1	1	1	1	1	1	1	1	1	1	1	1	1	1	1	1	1	1	1	1	1	1	1	1	1	1	1	1	1	1	1	1	1	1	1	1	1	1	1	1	1	1	1	1	1	1	1	1
C1057P736	2	1	2	1	2	2	2	1	1	2	1	2	2	2	2	2	2	2	2	2	2	1	2	1	2	2	2	1	1	3	2	1	2	2	1	3	2	1	2	2	3	2	1	2	2	1	1	2	2
C1460P913	2	3	2	3	2	3	2	3	2	2	3	2	3	3	3	3	2	3	3	2	2	2	2	2	3	3	3	3	3	3	3	3	3	3	3	3	3	3	3	3	3	3	3	3	3	3	3	3	2
C5889P724	2	2	2	2	1	2	3	3	2	1	1	2	2	2	1	3	2	2	3	3	3	3	1	3	3	3	3	3	3	3	3	3	3	3	3	3	3	3	3	3	3	3	3	3	3	3	3	3	3
C6124P605	2	2	3	2	2	2	2	1	1	2	1	2	2	2	1	1	2	1	1	3	2	2	2	2	2	1	1	1	1	2	1	1	2	2	2	2	1	2	1	2	2	2	1	1	2	1	2	2	1
C7987P244	2	1	1	2	2	1	2	2	2	2	1	2	2	1	1	1	2	2	2	1	2	2	1	1	1	1	1	1	1	1	1	1	1	1	1	1	1	1	1	1	1	1	1	1	1	1	1	1	1
C1551P943	3	3	3	3	3	3	3	3	3	3	3	3	3	3	3	3	3	3	3	3	3	3	3	3	3	3	3	3	3	3	3	3	3	3	3	3	3	3	3	3	3	3	3	3	3	3	3	3	3
C3882P430	2	2	2	1	2	2	2	1	2	1	2	2	1	1	2	3	2	2	1	2	2	3	2	2	2	1	1	1	2	2	1	1	1	1	2	2	2	2	1	1	2	1	1	1	2	1	2	2	1
C7168P392	1	1	1	1	1	1	1	1	1	1	1	1	1	1	1	1	1	1	1	1	1	1	1	1	2	1	1	1	1	2	2	1	2	2	2	1	2	2	2	1	1	2	2	2	1	2	2	2	1
C4279P1962	2	3	3	2	2	3	2	2	2	2	2	2	2	2	3	2	3	2	3	2	2	2	3	3	3	2	2	3	2	3	2	2	2	3	2	3	2	2	3	3	2	3	3	3	2	2	2	2	1
C495P1032	1	1	1	1	1	1	1	1	1	1	1	1	1	1	1	1	1	1	1	1	1	1	1	1	1	1	1	1	1	1	1	1	1	1	1	1	1	1	1	1	1	1	1	1	1	1	1	1	1
C6316P224	1	1	1	1	1	1	1	1	1	1	1	1	1	1	1	1	1	1	1	1	1	1	1	1	2	2	2	2	1	3	2	1	2	2	2	3	1	1	2	3	1	2	2	2	3	1	2	2	1
C4372P90	3	3	3	3	3	3	3	3	3	3	3	3	3	3	3	3	3	3	3	3	3	3	3	3	2	2	1	2	1	1	2	2	3	2	2	1	1	2	2	3	2	2	3	3	2	2	2	1	3
C5015P146	2	2	1	2	3	1	3	2	2	3	1	2	3	1	1	1	2	3	3	2	3	2	2	2	2	2	1	2	2	1	2	2	2	2	2	2	2	3	1	2	2	2	3	1	2	2	1	3	1
C5989P534	3	3	3	3	3	3	3	3	3	3	3	3	3	3	3	3	3	3	3	3	3	3	3	3	3	3	3	3	3	3	3	3	3	3	3	3	3	3	3	3	3	3	3	3	3	3	3	3	3
C1000P448	1	1	1	1	1	1	1	1	1	1	1	1	1	1	1	1	1	1	1	1	1	1	1	1	1	1	1	1	1	1	1	1	1	1	1	1	1	1	1	1	1	1	1	1	1	1	1	1	1
C5904P630	3	3	3	3	3	3	3	3	3	3	3	3	3	3	3	3	3	3	3	3	3	3	3	3	3	3	3	3	3	3	3	3	3	3	3	3	3	3	3	3	3	3	3	3	3	3	3	3	3
C1601P308	1	1	1	1	1	1	1	1	1	1	1	1	1	1	1	1	1	1	1	1	1	1	1	1	1	2	2	1	2	1	2	2	2	1	2	1	2	2	1	1	2	1	2	1	2	2	2	2	2
C2062P1292	3	2	2	3	2	2	2	2	3	3	2	2	2	2	3	2	2	2	3	2	3	2	2	2	2	3	3	2	2	3	2	2	3	3	2	3	3	2	3	2	3	3	2	2	2	2	2	3	3
C4470P752	3	3	3	3	3	3	3	3	3	3	3	3	3	3	3	3	3	3	3	3	3	3	3	3	2	2	3	2	2	2	2	2	2	3	3	3	3	2	2	1	3	2	3	2	3	2	2	2	3
C297P539	1	1	1	1	1	1	1	1	1	1	1	1	1	1	1	1	1	1	1	1	1	1	1	1	1	1	1	1	1	1	1	1	1	1	1	1	1	1	1	1	1	1	1	1	1	1	1	1	1
C7313P621	2	2	2	3	1	2	1	3	2	2	2	2	2	3	3	2	2	3	3	1	1	2	1	1	2	1	1	2	1	1	1	1	2	2	2	2	2	2	2	1	1	1	2	2	2	1	1	2	1
C5967P248	3	3	3	3	3	3	3	3	3	3	3	3	3	3	3	3	3	3	3	3	3	3	3	3	3	3	3	3	3	3	3	3	3	3	3	3	3	3	3	3	3	3	3	3	3	3	3	3	3
C4114P1160	2	2	2	1	1	2	1	2	3	1	1	2	1	2	2	3	2	2	2	2	2	2	1	3	2	2	3	3	2	2	3	2	3	3	2	2	2	2	3	3	1	2	3	2	2	3	1	1	2
C958P394	2	2	2	2	2	2	2	2	2	2	2	2	2	2	2	2	2	2	2	2	2	2	2	2	2	2	2	2	2	2	2	2	2	2	2	2	2	2	2	2	0	2	2	2	2	2	2	2	2
C8080P85	3	3	3	3	3	3	3	3	3	3	3	3	3	3	3	3	3	3	3	3	3	3	3	3	3	3	3	3	3	3	3	3	3	3	3	3	3	3	3	3	3	3	3	3	3	3	3	3	3
C1786P451	3	3	3	3	3	3	3	3	3	3	3	3	3	3	3	3	3	3	3	3	3	3	3	3	3	3	3	3	3	3	3	3	3	3	3	3	3	3	3	3	3	3	3	3	3	3	3	3	3
C6254P314	3	3	3	3	3	3	3	3	3	3	3	3	3	3	3	3	3	3	3	3	3	3	3	3	3	3	3	3	3	3	3	3	3	3	3	3	3	3	3	3	3	3	3	3	3	3	3	3	3
C2211P927	1	1	1	1	1	1	1	1	1	1	1	1	1	1	1	1	1	1	1	1	1	1	1	1	1	1	1	1	1	1	1	1	1	1	1	1	1	1	1	1	1	1	1	1	1	1	1	1	1
C5391P356	1	1	1	1	1	1	1	1	1	1	1	1	1	1	1	1	1	1	1	1	1	1	1	1	1	1	1	1	1	1	1	1	1	1	1	1	1	1	1	1	1	1	1	1	1	1	1	1	1
C13P288	3	3	3	3	3	3	3	3	3	3	3	3	3	3	3	3	3	3	3	3	3	3	3	3	3	3	3	3	3	3	3	3	3	3	3	3	3	3	3	3	3	3	3	3	3	3	3	3	2
C6125P318	3	3	3	3	3	3	3	3	3	3	3	3	3	3	3	3	3	3	3	3	3	3	3	3	3	3	3	3	3	3	3	3	3	3	3	3	3	3	3	3	3	3	3	3	3	3	3	3	3
C7094P244	1	1	1	1	1	1	1	1	1	1	1	1	1	1	1	1	1	1	1	1	1	1	1	1	2	2	1	2	2	2	2	2	3	1	1	1	1	2	2	3	1	2	1	2	1	2	2	2	2
C562P821	3	3	3	3	3	3	3	3	3	3	3	3	3	3	3	3	3	3	3	3	3	3	3	3	2	2	2	2	1	2	1	2	3	3	3	3	1	3	1	3	3	2	1	1	2	2	3	2	1
C4287P624	2	2	3	2	1	2	3	3	2	1	1	2	2	2	1	3	2	2	3	3	3	3	1	3	2	2	3	2	1	2	2	3	2	1	2	1	2	1	3	2	1	3	1	2	1	1	2	3	2
C2153P373	1	1	1	1	1	1	1	1	1	1	1	1	1	1	1	1	1	1	1	1	1	1	1	1	1	1	1	1	1	1	1	1	1	1	1	1	1	1	1	1	1	1	1	1	1	1	1	1	1
C6700P474	2	2	2	2	1	2	3	3	2	1	1	2	2	2	1	3	2	2	3	3	3	3	1	3	2	2	3	2	1	2	2	3	2	1	2	1	2	1	3	2	1	3	1	2	1	1	3	3	2
C1243P108	1	1	1	1	1	1	1	1	1	1	1	1	1	1	1	1	1	1	1	1	1	1	1	1	2	2	1	2	2	2	2	2	3	3	2	2	3	1	1	1	1	2	1	2	3	1	2	2	1
C4246P687	3	1	2	2	2	2	2	2	2	2	2	2	2	2	2	2	2	2	2	2	2	2	2	2	2	1	2	1	1	2	1	1	2	2	1	2	2	1	2	1	2	2	1	1	1	1	1	2	2
C2859P144	2	2	2	2	2	3	2	3	1	2	3	2	1	2	2	3	3	3	1	1	2	1	3	2	3	3	3	3	3	3	3	3	3	3	3	3	3	3	3	3	3	3	3	3	3	3	3	3	2
C3639P536	1	1	1	1	1	1	1	1	1	1	1	1	1	1	1	1	1	1	1	1	1	1	1	1	1	1	1	1	1	1	1	1	1	1	1	1	1	1	1	1	1	1	1	1	1	1	1	1	1
C6794P604	3	3	3	3	3	3	3	3	3	3	3	3	3	3	3	3	3	3	3	3	3	3	3	3	1	1	1	1	1	1	1	1	1	1	1	1	1	1	1	1	1	1	1	1	1	1	1	1	2
C5016P330	1	1	1	1	1	1	1	1	1	1	1	1	1	1	1	1	1	1	1	1	1	1	1	1	1	1	1	1	1	1	1	1	1	1	1	1	1	1	1	1	1	1	1	1	1	1	1	1	1
C4336P681	3	3	3	3	3	3	3	3	3	3	3	3	3	3	3	3	3	3	3	3	3	3	3	3	3	3	3	3	3	3	3	3	3	3	3	3	3	3	3	3	3	3	3	3	3	3	3	3	3
C5240P845	2	3	2	3	3	2	3	3	3	3	2	3	3	2	2	2	3	3	3	2	3	3	2	2	2	2	1	2	2	1	2	2	2	2	2	2	2	3	1	2	0	2	3	1	2	2	1	3	2
C1051P597	2	3	3	2	2	3	2	3	2	2	2	2	2	2	2	3	3	3	3	2	3	3	2	3	3	3	3	3	3	3	3	3	3	3	3	3	3	3	3	3	3	3	3	3	3	3	3	3	2
C2791P471	3	3	3	3	3	3	3	3	0	0	3	3	3	3	3	3	3	3	3	0	3	0	3	3	3	3	3	3	3	3	3	3	3	3	3	3	3	3	3	3	3	3	3	3	3	3	3	3	3
C6641P648	3	3	3	3	3	3	3	3	3	0	3	3	3	3	0	3	3	3	3	3	0	3	0	0	2	2	2	2	2	2	1	2	2	2	2	1	1	2	2	2	3	2	3	2	2	2	3	2	3
C3620P685	2	1	2	2	1	1	2	1	1	1	2	2	2	2	2	2	2	2	1	1	2	1	2	2	1	1	1	1	1	1	1	1	1	1	1	1	1	1	1	1	1	1	1	1	1	1	1	1	1
C8071P339	2	2	3	2	3	1	1	1	1	3	3	1	1	1	3	1	2	2	2	3	2	2	1	3	3	2	3	2	2	3	2	2	3	2	3	3	2	2	2	2	2	2	3	3	3	3	3	2	1
C1431P926	2	2	2	2	2	2	1	1	2	2	2	2	2	2	2	2	2	2	2	2	2	2	1	2	1	2	2	2	2	1	2	2	1	1	1	1	2	1	1	2	2	2	2	1	2	2	2	1	2
C3354P1993	1	1	1	1	1	1	1	1	1	1	1	1	1	1	1	1	1	1	1	1	1	1	1	1	3	3	3	3	3	3	3	3	3	3	3	3	3	3	3	3	3	3	3	3	3	3	3	3	1
C6805P737	1	1	1	1	1	1	1	1	1	1	1	1	1	1	1	1	1	1	1	1	1	1	1	1	1	1	1	1	1	1	1	1	1	1	1	1	1	1	1	1	1	1	1	1	1	1	1	1	2
C667P485	2	2	1	2	2	3	3	2	3	1	2	2	3	2	2	2	3	1	2	2	3	2	2	1	2	2	2	2	3	1	2	3	2	2	2	1	3	3	2	1	3	2	2	2	1	3	2	2	3
C2942P539	3	3	3	3	3	3	3	3	3	3	3	3	3	3	3	3	3	3	3	3	3	3	3	3	3	3	3	3	3	3	3	3	3	3	3	3	3	3	3	3	3	3	3	3	3	3	3	3	3
C2712P374	3	3	3	3	3	3	3	3	3	3	3	3	3	3	3	3	3	3	3	3	3	3	3	3	3	3	3	3	3	3	3	3	3	3	3	3	3	3	3	3	3	3	3	3	3	3	3	3	3
C2459P1156	1	2	1	1	1	2	2	1	1	1	1	2	2	1	2	1	1	2	1	2	1	2	1	1	1	1	1	1	1	1	1	1	1	1	1	1	1	1	1	1	1	1	1	1	1	1	1	1	1
C3635P372	2	2	2	1	2	2	2	1	2	1	2	2	2	1	2	3	2	2	1	2	2	3	2	2	2	2	1	2	2	3	1	2	2	1	3	2	2	3	2	1	3	1	1	1	2	2	2	3	2
C2300P781	2	2	2	1	1	2	2	2	1	1	3	1	2	2	2	1	2	1	2	2	2	2	2	3	3	3	3	3	3	3	3	3	3	3	3	3	3	3	3	3	3	3	3	3	3	3	3	3	3
C3714P2699	2	2	3	1	3	2	2	1	1	2	1	2	2	2	2	3	2	3	2	2	2	3	2	2	3	3	3	3	3	3	3	3	3	3	3	3	3	3	3	3	3	3	3	3	3	3	3	3	1
C2901P471	1	1	1	1	1	1	1	1	1	1	1	1	1	1	1	1	1	1	1	1	1	1	1	1	1	1	1	1	1	1	1	1	1	1	1	1	1	1	1	1	1	1	1	1	1	1	1	1	1
C424P1719	1	1	1	1	1	1	1	1	1	1	1	1	1	1	1	1	1	1	1	1	1	1	1	1	2	2	3	2	3	3	2	2	1	2	2	3	3	2	2	1	2	2	1	1	2	2	2	3	1
C43P413	2	2	2	3	3	2	2	3	3	1	2	3	3	3	2	3	3	2	2	2	1	2	1	1	3	3	3	3	3	3	3	3	3	3	3	3	3	3	3	3	3	3	3	3	3	3	3	3	2
C2582P1581	1	2	2	2	1	2	1	2	2	1	2	2	1	2	2	2	2	1	1	1	1	2	1	1	1	1	1	1	1	1	1	1	1	1	1	1	1	1	1	1	1	1	1	1	1	1	1	1	2
C1417P367	2	2	2	2	2	2	2	2	2	2	2	2	2	2	2	2	2	2	2	2	2	2	2	2	2	1	2	2	2	2	2	2	2	2	2	1	2	2	2	2	2	2	2	2	1	2	2	1	3
C205P309	1	1	1	1	1	1	1	1	1	1	1	1	1	1	1	1	1	1	1	1	1	1	1	1	1	1	1	1	1	1	1	1	1	1	1	1	1	1	1	1	1	1	1	1	1	1	1	1	1
C5951P411	3	3	1	3	3	3	3	3	3	3	3	1	3	1	3	3	3	3	3	3	1	3	3	1	2	2	2	1	1	2	2	3	2	3	3	3	2	2	2	1	3	3	3	2	2	2	3	3	3
C3501P506	3	3	3	3	3	3	3	3	3	3	3	3	3	3	3	3	3	3	3	3	3	3	3	3	3	3	3	3	3	3	3	3	3	3	3	3	3	3	3	3	3	3	3	3	3	3	3	3	3
C2496P64	2	2	2	2	1	3	2	2	2	2	2	2	3	2	1	1	2	2	3	3	1	2	2	1	1	1	1	1	1	1	1	1	1	1	1	1	1	1	1	1	1	1	1	1	1	1	1	1	1
C2602P515	3	2	2	2	3	2	3	2	2	3	2	2	3	2	2	2	2	3	3	3	3	2	3	3	3	3	3	3	3	3	3	3	3	3	3	3	3	3	3	3	3	3	3	3	3	3	3	3	2
C3936P321	1	1	1	1	1	1	1	1	1	1	1	1	1	1	1	1	1	1	1	1	1	1	1	1	1	1	1	1	1	1	1	1	1	1	1	1	1	1	1	1	1	1	1	1	1	1	1	1	1
C3365P583	3	3	3	3	3	3	3	3	3	3	3	3	3	3	3	3	3	3	3	3	3	3	3	3	2	2	2	2	2	2	1	3	2	2	2	1	2	1	1	2	2	3	1	3	3	2	2	2	2
C2658P343	3	2	3	3	3	3	3	2	2	3	2	2	3	3	2	2	2	3	3	3	3	2	3	3	3	3	3	3	3	3	3	3	3	3	3	3	3	3	3	3	3	3	3	3	3	3	3	3	3
C1947P134	3	1	2	2	2	2	2	2	2	2	2	2	2	2	2	2	2	2	2	2	2	2	2	2	2	2	1	1	3	2	2	2	3	1	2	2	3	3	3	3	2	2	2	1	2	2	1	3	2
C2566P384	1	1	1	1	1	1	1	1	1	1	1	1	1	1	1	1	1	1	1	1	1	1	1	1	1	1	1	1	1	1	1	1	1	1	1	1	1	1	1	1	1	1	1	1	1	1	1	1	1
C7827P781	3	3	3	3	3	3	3	3	3	3	3	3	3	3	3	3	3	3	3	3	3	3	3	3	3	3	3	3	3	3	3	3	3	3	3	3	3	3	3	3	3	3	3	3	3	3	3	3	3
C1395P273	2	1	2	1	1	2	2	2	2	2	2	1	2	1	2	2	2	1	2	1	2	2	1	1	1	1	1	1	1	1	1	1	1	1	1	1	1	1	1	1	1	1	1	1	1	1	1	1	2
C5628P417	3	3	3	3	3	3	3	3	3	3	3	3	3	3	3	3	3	3	3	3	3	3	3	3	2	2	2	2	2	3	2	2	2	2	2	2	2	1	2	2	2	2	1	3	2	2	3	1	3
C5713P784	2	2	3	2	1	2	2	2	2	1	1	3	2	2	2	2	3	2	3	3	2	3	1	2	1	1	1	1	1	1	1	1	1	1	1	1	1	1	1	1	1	1	1	1	1	1	1	1	1
C5886P1710	1	2	1	1	1	2	1	1	1	2	2	2	1	1	2	1	1	2	2	2	2	2	2	2	2	1	1	1	1	2	2	1	2	2	2	1	2	2	2	1	1	2	2	2	1	2	2	2	1
C3610P412	3	3	3	3	3	3	3	3	3	3	3	3	3	3	3	3	3	3	3	3	3	3	3	3	2	2	1	2	1	1	2	2	3	2	2	1	1	2	2	3	2	2	3	3	2	2	2	1	3
C533P250	1	1	1	1	1	1	1	1	1	1	1	1	1	1	1	1	1	1	1	1	1	1	1	1	2	2	2	2	2	2	3	2	2	2	2	3	3	2	2	2	1	2	1	2	2	2	1	2	2
C393P1212	3	3	3	3	3	3	3	3	3	3	3	3	3	3	3	3	3	3	3	3	3	3	3	3	2	2	1	2	1	1	2	2	3	2	2	1	1	2	2	3	2	2	3	3	2	2	2	1	3
C1832P509	2	2	2	2	3	1	2	1	2	1	2	2	2	2	2	1	1	2	1	1	1	2	1	2	1	1	1	1	1	1	1	1	1	1	1	1	1	1	1	1	1	1	1	1	1	1	1	1	2
C6257P640	2	3	2	3	2	3	3	3	2	3	2	2	3	3	3	3	2	2	3	2	3	3	2	3	3	3	3	3	3	3	3	3	3	3	3	3	3	3	3	3	3	3	3	3	3	3	3	3	2
C5871P606	1	1	1	1	1	1	1	1	1	1	1	1	1	1	1	1	1	1	1	1	1	1	1	1	1	1	1	1	1	1	1	1	1	1	1	1	1	1	1	1	1	1	1	1	1	1	1	1	1
C7487P213	3	3	3	3	3	3	3	3	3	3	3	3	3	3	3	3	3	3	3	3	3	3	3	3	2	2	1	2	2	2	1	2	1	1	2	2	2	2	1	1	3	2	1	2	2	1	3	3	3
C5143P575	2	2	3	3	2	1	1	2	2	2	2	2	2	2	1	2	1	2	2	2	1	3	2	2	2	2	3	1	3	2	1	1	2	2	3	2	2	1	2	2	2	2	1	2	2	2	3	2	1
C5308P474	1	1	1	1	1	1	1	1	1	1	1	1	1	1	1	1	1	1	1	1	1	1	1	1	1	1	1	1	1	1	1	1	1	1	1	1	1	1	1	1	1	1	1	1	1	1	1	1	2
C2847P426	2	2	1	3	1	2	2	3	3	2	3	2	2	2	2	1	2	1	2	2	2	1	2	2	1	1	1	1	1	1	1	1	1	1	1	1	1	1	1	1	1	1	1	1	1	1	1	1	1
C7932P447	1	1	1	1	1	1	1	1	1	1	1	1	1	1	1	1	1	1	1	1	1	1	1	1	1	1	1	1	1	1	1	1	1	1	1	1	1	1	1	1	1	1	1	1	1	1	1	1	1
C2370P476	2	3	2	2	3	3	2	3	3	3	2	2	2	2	2	2	2	2	3	3	2	3	2	2	3	3	3	3	3	3	3	3	3	3	3	3	3	3	3	3	3	3	3	3	3	3	3	3	2
C1472P141	1	1	1	1	1	1	1	1	1	1	1	1	1	1	1	1	1	1	1	1	1	1	1	1	1	1	1	1	1	1	1	1	1	1	1	1	1	1	1	1	1	1	1	1	1	1	1	1	2
C399P560	3	3	3	3	3	3	3	3	3	3	3	3	3	3	3	3	3	3	3	3	3	3	3	3	2	3	3	3	2	3	2	3	2	2	2	2	2	2	3	2	2	3	2	2	2	2	3	3	2
C7759P200	1	2	1	2	2	1	1	1	1	1	2	1	2	2	1	2	2	1	1	1	1	1	1	1	1	1	1	1	1	1	1	1	1	1	1	1	1	1	1	1	1	1	1	1	1	1	1	1	1
C2745P311	3	3	0	3	0	3	3	3	3	3	0	3	3	3	3	3	3	3	3	0	3	3	3	3	3	3	3	3	3	3	3	3	3	3	3	3	3	3	3	3	3	3	3	3	3	3	3	3	3
C242P217	1	1	1	1	1	1	1	1	1	1	1	1	1	1	1	1	1	1	1	1	1	1	1	1	1	1	1	1	1	1	1	1	1	1	1	1	1	1	1	1	1	1	1	1	1	1	1	1	1
C1743P582	2	2	2	2	1	3	2	3	1	3	2	2	2	2	2	3	3	2	3	3	3	2	3	2	2	2	2	2	1	3	2	1	2	3	3	2	3	3	3	2	1	2	3	2	1	3	2	2	2
C1364P324	1	1	1	1	1	1	1	1	1	1	1	1	1	1	1	1	1	1	1	1	1	1	1	1	1	1	1	1	1	1	1	1	1	1	1	1	1	1	1	1	1	1	1	1	1	1	1	1	1
C3218P744	1	2	1	2	2	2	2	1	2	1	1	1	2	1	2	1	2	1	1	1	1	2	1	1	1	1	1	1	1	1	1	1	1	1	1	1	1	1	1	1	1	1	1	1	1	1	1	1	1
C6547P639	3	3	3	3	3	3	3	3	3	3	3	3	3	3	3	3	3	3	3	3	3	3	3	3	3	2	3	2	2	3	2	2	2	2	3	2	2	3	2	3	3	3	3	3	3	3	3	2	2
C5729P894	1	3	2	2	2	2	2	2	2	2	2	2	2	2	2	2	2	2	2	2	2	2	2	2	2	1	1	2	2	1	2	2	1	1	2	1	1	2	1	2	1	1	2	2	2	2	2	1	1
C1223P583	3	2	3	2	2	3	3	3	3	3	2	3	2	2	3	2	2	3	3	3	3	3	3	3	3	3	3	3	3	3	3	3	3	3	3	3	3	3	3	3	3	3	3	3	3	3	3	3	3
C3499P670	2	2	2	2	2	3	2	2	1	1	2	1	2	2	3	3	2	2	2	2	2	3	2	3	2	2	3	2	2	2	2	2	1	3	3	3	3	2	2	1	3	2	3	2	3	2	2	2	2
C2387P430	2	2	2	2	3	1	2	2	3	3	2	3	2	2	1	1	2	2	2	2	2	1	2	1	2	2	1	2	2	2	2	2	2	1	1	1	1	2	2	3	1	2	1	2	1	2	2	2	1
C5123P257	1	2	2	2	1	1	1	1	1	1	1	2	2	2	1	1	2	1	2	2	1	1	2	1	1	1	1	1	1	1	1	1	1	1	1	1	1	1	1	1	1	1	1	1	1	1	1	1	2
C4382P862	2	2	2	2	3	2	2	1	2	2	1	2	1	3	1	1	1	2	2	2	3	2	3	2	3	3	3	3	3	3	3	3	3	3	3	3	3	3	3	3	3	3	3	3	3	3	3	3	2
C5503P582	1	1	1	1	1	1	1	1	1	1	1	1	1	1	1	1	1	1	1	1	1	1	1	1	1	1	1	1	1	1	1	1	1	1	1	1	1	1	1	1	1	1	1	1	1	1	1	1	1
C2784P174	1	1	1	1	1	1	1	1	1	1	1	1	1	1	1	1	1	1	1	1	1	1	1	1	1	1	1	1	1	1	1	1	1	1	1	1	1	1	1	1	1	1	1	1	1	1	1	1	1
C2277P301	2	2	2	2	1	2	1	2	2	1	3	2	1	3	3	3	2	1	1	2	1	2	2	2	3	3	3	3	3	3	3	3	3	3	3	3	3	3	3	3	3	3	3	3	3	3	3	3	3
C1959P117	3	3	3	3	3	3	3	3	3	3	3	3	3	3	3	3	3	3	3	3	3	3	3	3	3	3	3	3	3	3	3	3	3	3	3	3	3	3	3	3	3	3	3	3	3	3	3	3	2
C3599P364	1	1	1	1	1	1	1	1	1	1	1	1	1	1	1	1	1	1	1	1	1	1	1	1	1	2	1	1	2	1	2	2	1	2	2	2	1	1	1	1	0	2	2	1	1	1	2	2	1
C1558P502	3	3	3	3	3	3	3	3	3	3	3	3	3	3	3	3	3	3	3	3	3	3	3	3	3	3	3	3	3	3	3	3	3	3	3	3	3	3	3	3	3	3	3	3	3	3	3	3	3
C4454P492	1	1	1	1	1	1	1	1	1	1	1	1	1	1	1	1	1	1	1	1	1	1	1	1	1	1	1	1	1	1	1	1	1	1	1	1	1	1	1	1	1	1	1	1	1	1	1	1	1
C2767P472	0	1	0	0	0	1	0	1	0	1	1	1	0	0	1	0	0	1	1	1	1	1	1	1	1	1	1	1	1	1	1	1	1	1	1	1	1	1	1	1	1	1	1	1	1	1	1	1	1
C552P383	1	1	1	1	1	1	1	1	1	1	1	1	1	1	1	1	1	1	1	1	1	1	1	1	1	2	2	2	3	2	3	1	1	3	1	3	1	3	2	1	1	1	3	3	3	1	1	1	1
C1183P1288	2	2	2	3	2	2	2	3	2	3	2	2	2	3	2	1	2	2	3	2	2	1	3	2	2	3	3	3	2	2	3	3	3	3	2	2	2	2	3	3	2	3	3	3	2	3	2	2	2
C4701P1194	3	3	3	3	3	3	3	3	3	3	3	3	3	3	3	3	3	3	3	3	3	3	3	3	3	3	3	3	3	3	3	3	3	3	3	3	3	3	3	3	3	3	3	3	3	3	3	3	3
C6410P365	3	3	3	3	3	3	3	3	3	3	3	3	3	3	3	3	3	3	3	3	3	3	3	3	2	2	1	2	2	2	1	1	2	3	3	3	2	2	3	2	1	2	3	3	2	1	1	1	3
C4494P1587	2	3	2	3	3	2	2	2	2	2	2	3	2	3	2	2	2	3	2	3	2	2	3	3	3	3	3	3	3	3	3	3	3	3	3	3	3	3	3	3	3	3	3	3	3	3	3	3	2
C355P254	1	2	1	2	2	2	2	1	2	1	2	1	2	1	2	1	2	1	1	1	2	2	1	1	1	1	1	1	1	1	1	1	1	1	1	1	1	1	1	1	1	1	1	1	1	1	1	1	1
C779P213	1	1	1	1	1	1	1	1	1	1	1	1	1	1	1	1	1	1	1	1	1	1	1	1	3	3	3	3	3	3	3	3	3	3	3	3	3	3	3	3	3	3	3	3	3	3	3	3	0
C1992P544	3	2	3	2	3	3	3	2	3	2	3	2	3	2	2	3	3	2	2	2	3	3	2	2	2	2	1	2	2	2	1	2	1	1	3	2	2	3	1	1	3	1	1	1	2	2	3	3	3
C3257P375	1	1	1	1	1	1	1	1	1	1	1	1	1	1	1	1	1	1	1	1	1	1	1	1	1	1	1	1	1	1	1	1	1	1	1	1	1	1	1	1	1	1	1	1	1	1	1	1	1
C1012P682	3	3	3	3	3	3	3	3	3	3	3	3	3	3	3	3	3	3	3	3	3	3	3	3	2	2	1	2	3	2	2	2	3	3	2	1	3	2	1	1	3	2	1	3	2	2	1	2	3
C2725P240	1	1	1	1	1	1	1	1	1	1	1	1	1	1	1	1	1	1	1	1	1	1	1	1	1	1	1	1	1	1	1	1	1	1	1	1	1	1	1	1	1	1	1	1	1	1	1	1	2
C1422P414	1	1	1	1	1	1	1	1	1	1	1	1	1	1	1	1	1	1	1	1	1	1	1	1	1	1	1	1	1	1	1	1	1	1	1	1	1	1	1	1	1	1	1	1	1	1	1	1	1
C4992P598	2	2	2	2	1	1	3	1	3	1	1	2	3	2	1	1	1	1	3	3	2	3	1	2	3	2	3	3	3	3	2	2	3	2	2	2	3	3	3	3	0	2	2	2	3	2	2	2	2
C429P421	2	2	1	2	3	3	1	3	2	2	3	2	2	2	2	1	2	1	2	1	1	2	2	1	2	2	3	2	3	3	2	2	1	2	2	3	3	2	2	1	2	2	1	1	2	2	2	3	2
C1840P532	3	3	3	3	3	3	3	3	3	3	3	3	3	3	3	3	3	3	3	3	3	3	3	3	3	3	3	3	3	3	3	3	3	3	3	3	3	3	3	3	3	3	3	3	3	3	3	3	3
C5850P446	3	3	3	3	3	3	3	3	3	3	3	3	3	3	3	3	3	3	3	3	3	3	3	3	3	2	3	2	3	3	3	2	3	3	2	3	3	2	2	3	2	3	3	3	3	2	2	2	3
C5115P177	3	2	3	2	2	2	2	3	2	3	2	3	2	3	2	3	2	3	3	2	2	2	3	3	2	2	2	2	3	1	2	3	1	2	2	1	3	3	2	2	3	2	2	2	1	3	2	2	2
C2690P122	1	1	1	1	1	1	1	1	1	1	1	1	1	1	1	1	1	1	1	1	1	1	1	1	1	1	1	1	1	1	1	1	1	1	1	1	1	1	1	1	1	1	1	1	1	1	1	1	1
C5160P798	1	1	1	1	1	1	1	1	1	1	1	1	1	1	1	1	1	1	1	1	1	1	1	1	1	1	1	1	1	1	1	1	1	1	1	1	1	1	1	1	1	1	1	1	1	1	1	1	1
C3357P311	3	3	3	3	3	3	3	3	3	3	3	3	3	3	3	3	3	3	3	3	3	3	3	3	3	3	3	3	3	3	3	3	3	3	3	3	3	3	3	3	3	3	3	3	3	3	3	3	3
C7640P532	3	3	3	3	3	3	3	3	3	3	3	3	3	3	3	3	3	3	3	3	3	3	3	3	3	2	3	2	3	3	3	2	3	3	2	3	3	2	3	3	2	3	3	3	3	2	2	2	2
C2928P660	1	2	2	2	1	1	2	1	2	2	1	2	1	1	2	1	1	1	2	1	2	1	1	2	1	1	1	1	1	1	1	1	1	1	1	1	1	1	1	1	1	1	1	1	1	1	1	1	1
C1113P213	3	3	3	3	3	3	3	3	3	3	3	3	3	3	3	3	3	3	3	3	3	3	3	3	2	2	2	3	3	3	2	1	2	1	3	2	3	2	1	2	2	2	2	2	2	2	2	2	3
C6298P99	3	3	3	3	3	3	3	3	3	3	3	3	3	3	3	3	3	3	3	3	3	3	3	3	3	3	3	3	3	3	3	3	3	3	3	3	3	3	3	3	3	3	3	3	3	3	3	3	3
C2740P167	3	3	3	3	3	3	3	3	3	3	3	3	3	3	3	3	3	3	3	3	3	3	3	3	3	3	3	3	3	3	3	3	3	3	3	3	3	3	3	3	3	3	3	3	3	3	3	3	3
C334P684	3	2	3	2	3	3	3	3	3	3	3	2	2	2	3	3	3	2	2	3	2	3	2	3	3	2	3	3	2	3	2	3	3	3	3	2	3	2	2	3	3	2	2	2	3	3	3	2	3
C4945P421	3	3	3	3	3	3	3	3	3	3	3	3	3	3	3	3	3	3	3	3	3	3	3	3	3	3	3	3	3	3	3	3	3	3	3	3	3	3	3	3	3	3	3	3	3	3	3	3	3
C2150P257	3	2	2	3	2	2	2	2	3	3	2	3	2	2	3	2	2	2	3	2	3	2	2	2	2	2	2	2	1	3	2	1	2	3	1	3	3	2	2	1	3	2	1	2	2	2	1	2	2
C2519P1592	3	3	3	3	3	3	3	3	3	3	3	3	3	3	3	3	3	3	3	3	3	3	3	3	3	3	3	3	3	3	3	3	3	3	3	3	3	3	3	3	3	3	3	3	3	3	3	3	3
C1386P467	2	2	1	2	3	1	3	2	2	3	1	2	3	1	1	1	2	3	3	2	3	2	2	2	2	2	1	2	2	1	2	2	2	2	2	2	2	3	1	2	2	2	3	1	2	2	1	3	1
C768P488	3	3	3	3	3	3	3	3	3	3	3	3	3	3	3	3	3	3	3	3	3	3	3	3	3	3	3	3	3	3	3	3	3	3	3	3	3	3	3	3	3	3	3	3	3	3	3	3	3
C2130P875	2	2	1	1	3	2	2	3	2	1	2	3	1	1	1	2	2	2	2	2	1	1	1	2	1	1	1	1	1	1	1	1	1	1	1	1	1	1	1	1	1	1	1	1	1	1	1	1	1
C294P585	3	3	3	3	3	3	3	3	3	3	3	3	3	3	3	3	3	3	3	3	3	3	3	3	3	3	3	3	3	3	3	3	3	3	3	3	3	3	3	3	3	3	3	3	3	3	3	3	3
C3197P266	1	2	1	2	1	2	1	2	1	2	1	2	1	2	2	1	1	2	2	2	1	1	2	2	1	1	1	1	1	1	1	1	1	1	1	1	1	1	1	1	1	1	1	1	1	1	1	1	1
C5686P276	3	3	3	3	3	3	3	3	3	3	3	3	3	3	3	3	3	3	3	3	3	3	3	3	3	3	3	3	3	3	3	3	3	3	3	3	3	3	3	3	3	3	3	3	3	3	3	3	3
C7929P286	2	2	2	3	2	1	1	3	2	3	2	2	3	2	1	3	1	2	2	2	3	3	2	2	2	2	1	2	3	2	3	2	3	3	3	1	3	2	1	2	3	2	2	3	2	2	1	2	3
C6321P368	2	2	1	2	2	3	2	3	1	1	2	1	2	2	3	3	2	2	2	2	2	3	2	3	3	3	3	3	3	3	3	3	3	3	3	3	3	3	3	3	3	3	3	3	3	3	3	3	2
C2899P231	2	2	2	2	3	3	1	3	2	2	3	2	3	2	2	1	2	1	2	2	1	2	2	1	2	2	2	2	3	3	2	2	1	2	2	2	3	2	2	1	2	2	1	1	2	3	2	2	1
C5918P1870	2	2	2	1	2	2	1	1	2	2	2	1	2	1	2	2	2	2	2	2	1	2	3	2	2	2	3	2	2	2	3	3	2	1	1	1	2	2	1	2	3	2	1	1	2	3	3	3	1
C1631P1171	3	3	3	3	3	3	3	3	3	3	3	3	3	3	3	3	3	3	3	3	3	3	3	3	3	3	3	3	3	3	3	3	3	3	3	3	3	3	3	3	3	3	3	3	3	3	3	3	3
C597P1515	2	2	2	1	1	3	1	1	2	2	2	1	2	1	2	1	2	2	2	2	1	2	3	2	3	2	2	3	2	3	2	2	2	3	2	3	2	2	3	3	2	3	2	3	2	2	2	2	1
C1451P485	1	2	1	1	1	3	1	3	1	1	1	3	1	3	3	2	1	3	3	1	1	1	1	2	2	2	1	2	2	2	1	2	1	1	2	2	2	2	1	1	3	2	1	2	2	1	3	3	1
C3204P172	2	1	2	2	1	1	2	1	1	2	1	2	1	2	2	2	2	2	1	2	2	1	2	2	1	1	1	1	1	1	1	1	1	1	1	1	1	1	1	1	1	1	1	1	1	1	1	1	1
C5362P808	3	3	3	3	3	3	3	3	3	3	3	3	3	3	3	3	3	3	3	3	3	3	3	3	1	1	1	1	1	1	1	1	1	1	1	1	1	1	1	1	1	1	1	1	1	1	1	1	2
C6263P122	0	0	0	0	0	0	0	0	0	0	0	0	0	0	0	0	0	0	0	0	0	0	0	0	3	3	3	3	3	3	0	3	3	3	3	0	0	3	3	3	3	3	3	3	3	3	3	3	3
C3680P425	2	2	2	1	3	1	3	1	2	2	2	2	1	1	1	2	2	1	1	3	3	2	3	3	3	2	3	3	2	3	3	3	3	3	2	3	2	2	3	3	2	2	3	2	2	3	2	3	2
C4237P626	2	2	2	3	2	1	3	3	2	2	2	1	1	2	1	2	2	2	2	1	2	2	3	2	2	3	2	3	3	3	3	2	3	2	3	2	3	2	3	3	2	3	3	2	2	2	2	2	3
C7509P239	2	2	1	1	1	3	2	1	3	2	2	3	1	2	2	2	1	3	3	1	1	2	2	2	3	3	3	3	3	3	3	3	3	3	3	3	3	3	3	3	3	3	3	3	3	3	3	3	3
C7717P236	1	1	1	1	1	1	1	1	1	1	1	1	1	1	1	1	1	1	1	1	1	1	1	1	1	1	1	1	1	1	1	1	1	1	1	1	1	1	1	1	1	1	1	1	1	1	1	1	1
C3418P323	1	1	1	1	1	1	1	1	1	1	1	1	1	1	1	1	1	1	1	1	1	1	1	1	3	3	3	3	3	3	3	3	3	3	3	3	3	3	3	3	3	3	3	3	3	3	3	3	2
C4458P511	1	2	1	1	2	2	1	2	1	1	2	1	2	2	1	2	2	2	1	2	1	2	2	2	2	1	1	2	2	1	2	2	1	1	2	1	1	2	1	2	1	1	2	2	2	2	2	1	1
C2758P323	2	1	2	1	1	2	2	2	2	2	2	1	2	1	2	2	2	1	2	1	2	2	1	1	1	1	1	1	1	1	1	1	1	1	1	1	1	1	1	1	1	1	1	1	1	1	1	1	2
C6374P336	2	2	2	2	2	1	2	2	2	2	2	2	2	2	2	2	2	2	1	2	2	2	2	2	2	2	2	2	2	2	2	2	2	2	2	2	2	2	2	2	2	2	2	2	2	2	2	2	2
C3036P593	2	2	1	2	2	2	1	3	2	1	3	1	2	2	1	2	2	2	1	2	1	3	2	2	3	2	3	2	3	2	2	3	3	2	3	2	3	3	3	2	2	3	3	2	2	3	3	3	2
C1311P642	3	3	3	3	3	3	3	3	3	3	3	3	3	3	3	3	3	3	3	3	3	3	3	3	3	3	3	3	3	3	3	3	3	3	3	3	3	3	3	3	3	3	3	3	3	3	3	3	3
C2242P802	3	3	3	3	3	3	3	3	3	3	3	3	3	3	3	3	3	3	3	3	3	3	3	3	2	2	1	2	2	2	3	2	2	2	2	1	1	2	3	3	1	1	1	2	1	1	2	1	3
C2964P798	1	2	1	2	2	1	2	1	2	1	2	1	2	1	2	1	2	1	1	2	2	2	1	2	3	3	3	3	3	3	3	3	3	3	3	3	3	3	3	3	3	3	3	3	3	3	3	3	2
C1358P424	2	2	1	1	3	2	2	3	2	2	2	3	1	1	1	2	2	2	2	2	1	2	1	2	1	1	1	1	1	1	1	1	1	1	1	1	1	1	1	1	1	1	1	1	1	1	1	1	2
C2979P107	3	2	3	3	2	3	2	2	3	2	2	3	3	2	2	2	3	2	2	3	3	2	2	3	3	3	3	3	3	3	3	3	3	3	3	3	3	3	3	3	3	3	3	3	3	3	3	3	2
C3005P261	2	2	3	2	2	1	1	2	1	3	2	2	1	2	2	2	1	3	2	2	1	2	2	3	3	3	3	3	3	3	3	3	3	3	3	3	3	3	3	3	3	3	3	3	3	3	3	3	2
C3630P471	1	1	1	1	1	1	1	1	1	1	1	1	1	1	1	1	1	1	1	1	1	1	1	1	3	3	3	3	3	3	3	3	3	3	3	3	3	3	3	3	3	3	3	3	3	3	3	3	2
C4385P260	3	3	3	3	3	3	3	3	3	3	3	3	3	3	3	3	3	3	3	3	3	3	3	3	2	2	3	2	1	2	2	3	1	1	2	3	1	3	3	3	1	2	3	2	2	2	3	2	2
C3294P1249	2	3	2	2	3	3	2	3	3	3	2	2	2	2	2	2	2	2	3	3	2	3	2	2	3	3	3	3	3	3	3	3	3	3	3	3	3	3	3	3	3	3	3	3	3	3	3	3	2
C3351P718	1	1	1	1	1	1	1	1	1	1	1	1	1	1	1	1	1	1	1	1	1	1	1	1	2	1	1	2	1	2	2	1	2	1	1	2	1	1	2	2	1	1	1	1	2	1	1	2	1
C513P580	3	1	3	3	3	1	2	1	3	3	3	3	1	3	3	1	3	3	3	2	2	3	3	2	1	1	1	1	1	1	1	1	1	1	1	1	1	1	1	1	1	1	1	1	1	1	1	1	1
C7337P597	3	3	3	3	3	3	3	3	3	3	3	3	3	3	3	3	3	3	3	3	3	3	3	3	3	3	3	3	3	3	3	3	3	3	3	3	3	3	3	3	3	3	3	3	3	3	3	3	2
C5999P680	2	2	2	2	2	2	2	3	3	1	2	3	3	3	1	2	3	2	2	2	1	2	1	1	2	2	2	2	2	2	1	2	2	2	2	1	1	2	2	2	3	2	3	2	2	2	3	2	2
C1726P338	2	1	2	2	1	2	2	1	2	2	2	1	2	2	2	2	2	2	1	1	2	2	2	2	2	3	3	3	3	2	3	3	2	3	2	3	3	3	3	2	2	3	2	3	2	2	2	2	3
C5004P71	3	3	3	3	3	3	3	3	3	3	3	3	3	3	3	3	3	3	3	3	3	3	3	3	3	3	3	3	3	3	3	3	3	3	3	3	3	3	3	3	3	3	3	3	3	3	3	3	3
C3394P1632	2	2	2	3	2	2	2	3	2	3	2	2	2	3	3	1	1	3	3	2	2	1	3	2	2	3	3	3	2	2	3	3	3	3	2	2	2	2	3	3	2	3	3	3	2	3	2	2	1
C2430P256	1	1	1	1	1	1	1	1	1	1	1	1	1	1	1	1	1	1	1	1	1	1	1	1	1	2	2	2	1	1	2	2	1	1	2	1	1	2	2	2	2	1	2	1	1	2	2	2	1
C3472P645	1	2	1	1	1	1	1	2	2	1	2	2	1	1	2	2	2	1	1	1	1	2	1	1	2	2	2	1	3	1	2	2	1	2	1	2	2	3	2	2	2	2	3	1	3	2	1	2	3
C5486P2392	2	2	2	2	3	3	2	3	3	2	3	2	2	2	3	2	3	2	1	2	1	2	3	2	3	3	3	3	3	3	3	3	3	3	3	3	3	3	3	3	3	3	3	3	3	3	3	3	3
C2207P324	2	3	2	2	3	2	3	2	3	2	2	3	2	3	3	2	2	3	2	2	2	3	2	3	2	2	2	2	1	3	2	1	2	3	3	2	3	3	2	1	1	3	2	2	2	3	3	2	1
C1003P170	3	3	3	3	3	3	3	3	3	3	3	3	3	3	3	3	3	3	3	3	3	3	3	3	2	2	2	2	1	3	1	2	2	3	2	2	2	2	1	3	3	2	1	1	3	2	3	2	2
C1818P434	3	3	3	3	3	3	3	3	3	3	3	3	3	3	3	3	0	3	3	3	3	3	3	3	2	2	2	2	2	2	3	2	2	3	1	3	3	2	2	2	1	0	1	2	2	2	2	3	3
C1661P113	0	0	3	3	3	3	3	3	0	3	3	3	3	3	3	3	3	3	3	3	3	3	3	3	2	2	2	2	2	2	1	3	2	2	2	1	2	1	1	2	2	3	1	0	0	2	2	2	2
C3384P593	3	3	3	3	3	3	3	3	3	3	3	3	3	3	3	3	3	3	3	3	3	3	3	3	3	3	3	3	3	3	3	3	3	3	3	3	3	3	3	3	3	3	3	3	3	3	3	3	3
C2002P197	3	3	3	3	3	3	3	3	3	3	3	3	3	3	3	3	3	3	3	3	3	3	3	3	3	3	3	3	3	3	3	3	3	3	3	3	3	3	3	3	3	3	3	3	3	3	3	3	3
C1318P180	1	1	1	1	1	1	1	1	1	1	1	1	1	1	1	1	1	1	1	1	1	1	1	1	1	1	1	1	1	1	1	1	1	1	1	1	1	1	1	1	1	1	1	1	1	1	1	1	1
C453P238	2	2	2	3	2	2	2	2	1	2	2	2	2	2	2	2	1	3	1	2	1	2	2	2	2	1	2	1	2	1	1	2	1	2	2	1	2	2	1	1	2	2	2	2	1	2	2	1	1
C1654P1024	3	3	3	3	3	3	3	3	3	3	3	3	3	3	3	3	3	3	3	3	3	3	3	3	3	3	3	3	3	3	3	3	3	3	3	3	3	3	3	3	3	3	3	3	3	3	3	3	3
C2109P451	3	2	3	2	3	3	3	3	2	2	3	2	3	3	2	3	3	3	2	3	2	3	3	3	2	2	2	2	3	1	2	3	2	1	3	1	1	2	2	3	1	2	3	2	2	2	3	2	3
C1864P843	3	3	3	3	3	3	3	3	3	3	3	3	3	3	3	3	3	3	3	3	3	3	3	3	2	2	1	2	1	1	1	1	2	2	3	2	2	3	2	1	2	1	2	3	2	1	2	2	3
C3826P399	3	3	3	3	3	3	3	3	3	3	3	3	3	3	3	3	3	3	3	3	3	3	3	3	2	1	1	1	1	2	2	1	2	2	2	1	2	2	2	1	1	2	2	2	1	2	2	2	2
C4363P321	1	1	1	1	1	1	1	1	1	1	1	1	1	1	1	1	1	1	1	1	1	1	1	1	1	1	1	1	1	1	1	1	1	1	1	1	1	1	1	1	1	1	1	1	1	1	1	1	2
C1081P644	2	3	3	3	2	2	2	3	2	3	3	3	3	2	2	2	2	2	2	2	2	3	2	3	2	2	3	1	3	2	1	1	2	2	3	2	2	1	2	2	2	2	1	2	2	2	3	2	1
C3090P349	3	2	3	3	3	2	3	2	3	2	2	2	3	3	2	3	3	2	2	2	2	2	2	2	1	2	2	2	1	2	1	1	1	2	2	1	2	2	1	1	1	2	1	1	2	2	2	1	2
C1541P458	2	2	2	2	2	3	2	3	1	2	3	2	1	2	2	3	3	3	1	1	2	1	3	2	3	2	3	3	2	3	2	2	3	2	2	2	3	3	3	3	2	2	2	2	3	3	2	2	2
C1600P723	2	2	2	1	2	2	3	2	2	2	1	2	2	1	1	2	2	1	1	3	3	2	2	3	3	3	3	3	3	3	3	3	3	3	3	3	3	3	3	3	3	3	3	3	3	3	3	3	2
C6992P454	3	2	3	2	2	3	2	3	2	3	2	3	2	3	2	3	2	3	3	2	2	2	3	2	1	2	2	1	1	2	1	1	2	2	2	2	1	1	1	1	1	1	2	2	2	1	2	1	2
C5681P353	3	3	3	3	3	3	3	3	3	3	3	3	3	3	3	3	3	3	3	3	3	3	3	3	2	1	1	1	1	2	2	1	2	2	2	1	2	2	2	1	1	2	2	2	1	2	2	2	2
C3237P625	1	1	1	2	1	1	1	2	1	1	1	1	2	2	2	1	1	2	2	1	1	1	1	1	1	1	1	1	1	1	1	1	1	1	1	1	1	1	1	1	1	1	1	1	1	1	1	1	1
C1633P229	3	2	3	2	3	3	2	3	2	3	3	3	2	3	3	3	3	3	2	2	3	2	3	3	1	1	1	1	1	1	1	1	1	1	1	1	1	1	1	1	1	1	1	1	1	1	1	1	3
C3324P692	1	1	1	1	1	1	1	1	1	1	1	1	1	1	1	1	1	1	1	1	1	1	1	1	1	1	1	1	1	1	1	1	1	1	1	1	1	1	1	1	1	1	1	1	1	1	1	1	1
C3525P284	3	3	3	3	3	3	3	3	3	3	3	3	3	3	3	3	3	3	3	3	3	3	3	3	3	3	3	3	3	3	3	3	3	3	3	3	3	3	3	3	3	3	3	3	3	3	3	3	3
C2141P380	1	1	1	1	1	1	1	1	1	1	1	1	1	1	1	1	1	1	1	1	1	1	1	1	1	1	1	1	1	1	1	1	1	1	1	1	1	1	1	1	1	1	1	1	1	1	1	1	2
C491P811	2	1	1	2	2	1	2	1	2	2	2	2	2	2	2	1	1	1	1	2	1	1	2	1	2	2	3	2	2	2	2	2	1	1	2	2	1	3	3	3	3	2	3	2	1	3	2	2	2
C1382P326	2	1	2	2	1	1	1	2	2	2	1	2	2	1	1	2	1	1	2	2	2	2	2	1	2	2	3	2	1	2	2	3	1	1	2	3	1	2	3	3	1	2	3	1	2	2	3	2	1
C7320P334	3	3	3	3	3	3	3	3	3	3	3	3	3	3	3	3	3	3	3	3	3	3	3	3	3	3	3	3	3	3	3	3	3	3	3	3	3	3	3	3	3	3	3	3	3	3	3	3	3
C7146P595	3	2	2	2	2	3	3	3	3	3	2	2	2	2	2	3	2	3	3	3	3	3	3	3	3	3	3	3	3	3	3	3	3	3	3	3	3	3	3	3	3	3	3	3	3	3	3	3	3
C4663P1673	2	2	2	2	3	1	1	1	1	3	3	2	2	2	2	1	2	3	1	1	2	1	3	2	1	1	1	1	1	1	1	1	1	1	1	1	1	1	1	1	1	1	1	1	1	1	1	1	1
C2937P134	3	3	3	3	3	3	3	3	3	3	3	3	3	3	3	3	3	3	3	3	3	3	3	3	3	3	3	3	3	3	3	3	3	3	3	3	3	3	3	3	3	3	3	3	3	3	3	3	2
C1727P724	3	3	3	3	3	3	3	3	3	3	3	3	3	3	3	3	3	3	3	3	3	3	3	3	3	3	3	3	3	3	3	3	3	3	3	3	3	3	3	3	3	3	3	3	3	3	3	3	3
[truncated: 95 more columns]
